# Supplementary material
Source: PubMed Central journal article supplement (PMC3532044)
Supplement: NIHMS369994-supplement-Supporting_Information.pdf [file NIHMS369994-supplement-Supporting_Information.pdf]

Supporting Information

© Wiley-VCH 2011

69451 Weinheim, Germany

**Extensions of the Icosahedral Closoomer Structure by Using Azide–Alkyne Click Reactions\*\***

*Lalit N. Goswami, Shatadru Chakravarty, Mark W. Lee, Satish S. Jalisatgi, and M. Frederick Hawthorne\**

anie\_201101066\_sm\_miscellaneous\_information.pdf

## Supporting information

### Contents:

|                                                                                    |                     |
|------------------------------------------------------------------------------------|---------------------|
| Figure SI-1 and Figure SI-2                                                        | Pages <b>S2-S3</b>  |
| Experimental procedures and characterization                                       | Pages <b>S3-S7</b>  |
| $^1\text{H}$ , $^{13}\text{C}$ , $^{11}\text{B}$ NMR and mass spectra of compounds | Pages <b>S8-S44</b> |

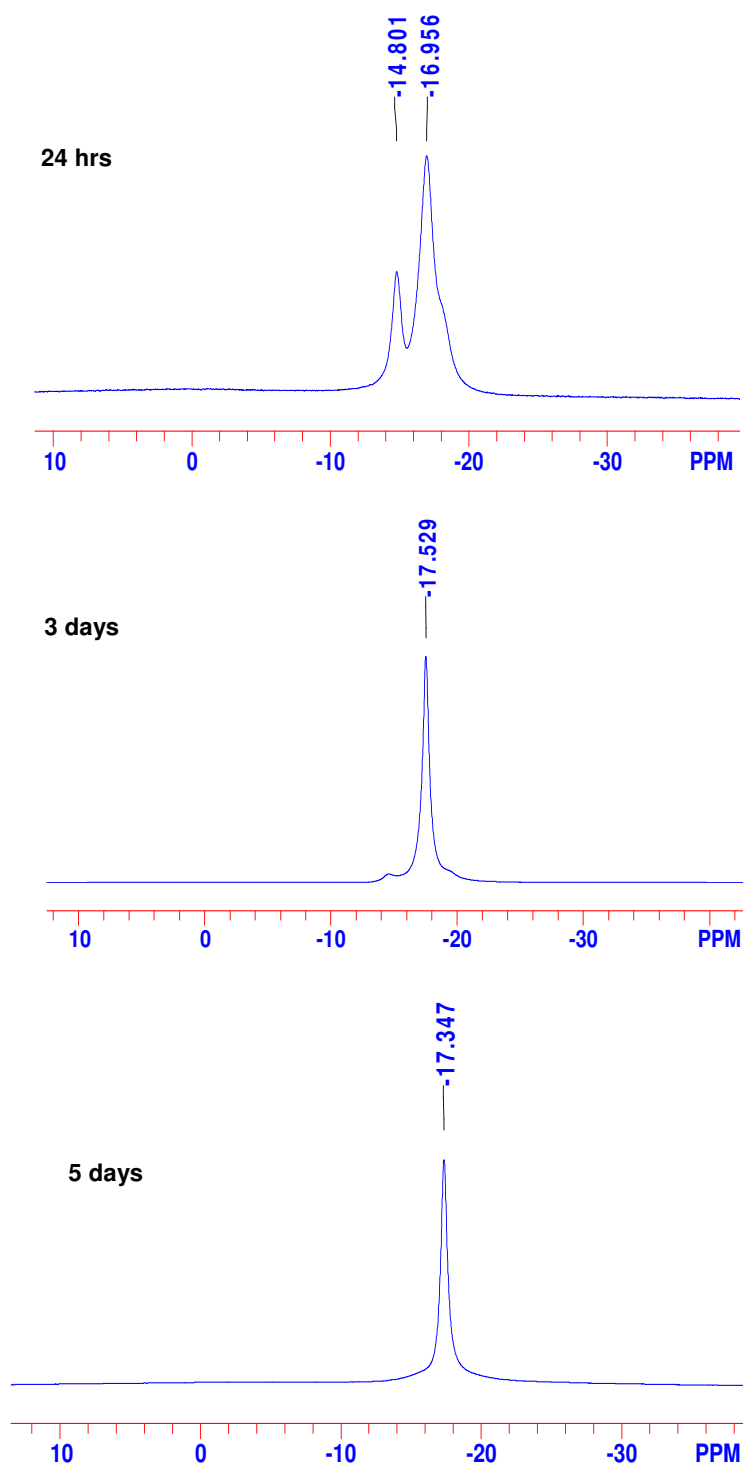

**Fig. SI-1:**  $^{11}\text{B}$  NMR spectra of reaction mixture showing progress of twelve fold esterification reaction using chloroacetic anhydride (Compound **2**).

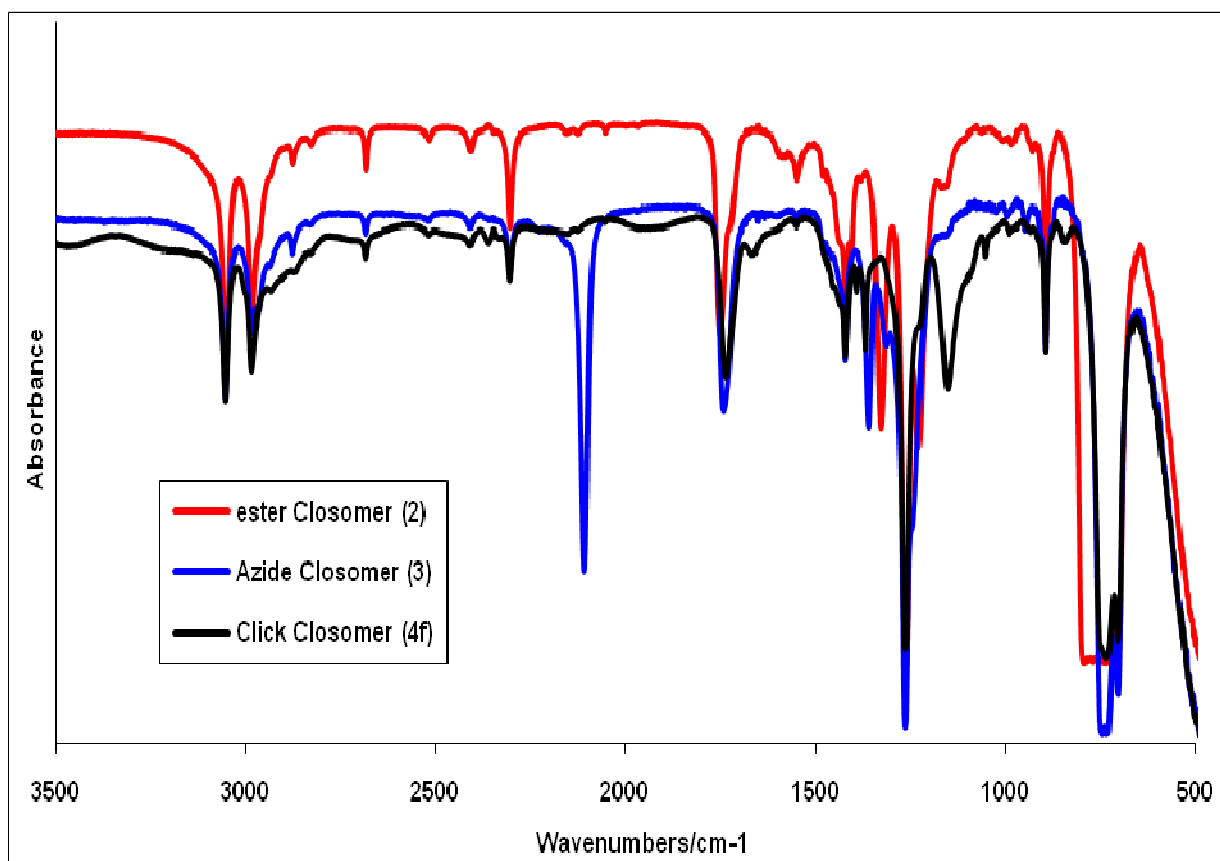

**Fig. SI-2:** IR spectras of compounds **2**, **3** and **4f** in dichloromethane.

## Experimental procedures and characterization

### General information:

All reactions were carried out in oven-dry glassware under an atmosphere of argon. Thin-layer chromatography (TLC) was carried out on precoated silica gel XHL TLC glass plates w/UV254 and aluminum oxide TLC glass plates w/UV254 (Sorbent Technologies). Column chromatography was performed over Silica Gel (40-63  $\mu\text{m}$  particles size) obtained from Sorbent Technologies or on neutral Alumina (Brockmann grade III, 200  $\mu\text{m}$ ), obtained from Acros Organics. Size exclusion chromatography was performed using Lipophilic Sephadex<sup>®</sup> LH-20 obtained from GE Healthcare. THF was distilled over sodium benzophenone ketyl and DCM was distilled over  $\text{P}_2\text{O}_5$ . Anhydrous DMF, anhydrous triethylamine, anhydrous pyridine and other solvents were obtained

from commercial suppliers (J.T. Baker<sup>®</sup>, EMD<sup>®</sup> and Aldrich<sup>®</sup>) and used without any further purification. NMR spectra were recorded on Bruker DRX 300, 400 and 500MHz spectrometers. All chemical shifts are reported in parts per million ( $\delta$ ). All NMR spectra were recorded at room temperature in CD<sub>3</sub>CN, CDCl<sub>3</sub> or CD<sub>3</sub>OD solutions. <sup>1</sup>H NMR spectra was referenced to residual CHCl<sub>3</sub> (7.26 ppm) and the <sup>13</sup>C spectra was referenced to CDCl<sub>3</sub> (77.2 ppm). The high-resolution mass spectrometry analyses were performed using Applied Biosystems Mariner ESI-TOF. IR spectra were recorded on Thermo Nicolet-AEM spectrophotometer using DCM as solvent.

#### Compound 4b:

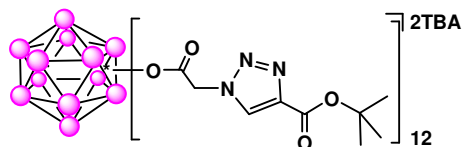

**4b** was synthesized from the azide functionalized closomer **3** (100 mg, 0.055 mmol), tert-butyl propiolate (416 mg, 3.30 mmol), copper (I) iodide (126 mg, 0.660 mmol) and diisopropylethylamine (853 mg, 6.60 mmol) using the general method for click reaction on closomers described in the article. Yield: 135 mg (74%). <sup>1</sup>H NMR (500 MHz, CD<sub>3</sub>CN):  $\delta$  8.30 (s, 12H), 4.98 (m, 24H), 3.11 (m, 16H), 1.60 (m, 16H), 1.50 (s, 108H), 1.27 (m, 16H), 0.99 (t, 24H,  $J = 7.5$  Hz). <sup>13</sup>C NMR (125 MHz, CD<sub>3</sub>CN):  $\delta$  164.90, 160.00, 81.50, 58.00, 51.92, 27.30, 23.19, 19.20 and 12.69. <sup>11</sup>B NMR (160 MHz, CD<sub>3</sub>CN):  $\delta$  -17.18. HRMS (m/z): Calcd. for C<sub>108</sub>H<sub>144</sub>B<sub>12</sub>N<sub>36</sub>O<sub>48</sub> (M<sup>2-</sup>) 1421.3627. Found: 1421.5554.

#### Compound 4c:

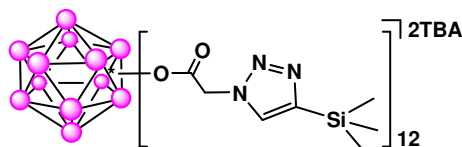

**4c** was synthesized from the azide functionalized closomer **3** (100 mg, 0.055 mmol), ethynyltrimethylsilane (324 mg, 3.30 mmol), copper (I) iodide (126 mg, 0.660 mmol) and

diisopropylethylamine (853 mg, 6.60 mmol) using the general method for click reaction on closomers described in the article. Yield: 115 mg (70%).  $^1\text{H}$  NMR (500 MHz,  $\text{CD}_3\text{CN}$ ):  $\delta$  7.56 (s, 12H), 4.89 (s, 24H), 3.11 (t, 16H,  $J = 8.5\text{Hz}$ ), 1.63 (m, 16H), 1.34 (m, 16H), 0.99 (t, 24H,  $J = 7.5\text{ Hz}$ ), 0.30 (s, 108H).  $^{11}\text{B}$  NMR (96 MHz,  $\text{CD}_3\text{CN}$ ):  $\delta$  -16.94. HRMS ( $m/z$ ): Calcd. for  $\text{C}_{84}\text{H}_{144}\text{B}_{12}\text{N}_{36}\text{O}_{24}\text{Si}_{12}$  ( $\text{M}^{2-}$ ) 1254.5135. Found: 1254.7012.

#### Compound 4d:

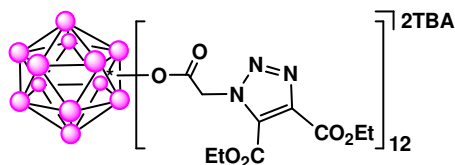

**4d** was synthesized from the azide functionalized closomer **3** (100 mg, 0.055 mmol), 5-diethyl acetylenedicarboxylate (561 mg, 3.30 mmol), copper (I) iodide (126 mg, 0.660 mmol) and diisopropylethylamine (853 mg, 6.60 mmol) using the general method for click reaction on closomers described in the article. Yield: 125 mg (59%).  $^1\text{H}$  NMR (400 MHz,  $\text{CD}_3\text{CN}$ ):  $\delta$  5.26 (m, 24H), 4.37 (m, 24H), 4.22 (m, 24H), 3.12 (t, 16H,  $J = 8.4\text{Hz}$ ), 1.62 (m, 16H), 1.34 (m, 52H), 1.22 (m, 36H), 0.97 (t, 24H,  $J = 7.2\text{ Hz}$ ).  $^{13}\text{C}$  NMR (100 MHz,  $\text{CD}_3\text{CN}$ ):  $\delta$  163.55, 160.16, 157.53, 139.49, 130.49, 62.51, 61.27, 58.06, 51.88, 23.03, 19.03, 13.17, 13.03, and 12.53.  $^{11}\text{B}$  NMR (128 MHz,  $\text{CD}_3\text{CN}$ ):  $\delta$  -17.62. HRMS ( $m/z$ ): Calcd. for  $\text{C}_{120}\text{H}_{180}\text{B}_{12}\text{N}_{48}\text{O}_{48}$  ( $\text{M}^{2-}$ ) 1685.9968. Found: 1685.9170 (11-fold and 10-fold substitution were also seen in mass spectrum).

#### Compound 4e:

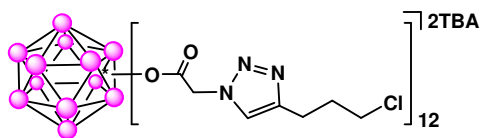

**4e** was synthesized from the azide functionalized closomer **3** (100 mg, 0.055 mmol), 5-chloro-1-pentyne (337 mg, 3.30 mmol), copper (I) iodide (126 mg, 0.660 mmol) and diisopropylethylamine (853 mg, 6.60 mmol) using the general method for click reaction

on closomer described in the article. Yield: 130 mg (78%).  $^1\text{H}$  NMR (400 MHz,  $\text{CD}_3\text{CN}$ ):  $\delta$  7.44 (s, 12H), 4.90 (s, 24H), 3.64 (t, 24H,  $J = 6.8\text{Hz}$ ), 3.11 (t, 16H,  $J = 8.4\text{Hz}$ ), 2.83 (t, 24H,  $J = 7.2\text{Hz}$ ), 2.10 (m, 24H), 1.62 (m, 16H), 1.36 (m, 16H), 0.98 (t, 24H,  $J = 7.2\text{ Hz}$ ).  $^{13}\text{C}$  NMR (100 MHz,  $\text{CD}_3\text{CN}$ ):  $\delta$  165.43, 145.74, 122.53, 57.83, 51.31, 44.03, 31.60, 22.79, 22.04, 18.82 and 12.30.  $^{11}\text{B}$  NMR (128 MHz,  $\text{CD}_3\text{CN}$ ):  $\delta$  -17.48. HRMS (m/z): Calcd. for  $\text{C}_{84}\text{H}_{108}\text{B}_{12}\text{C}_{112}\text{N}_{36}\text{O}_{24}$  ( $\text{M}^{2-}$ ) 1278.2858. Found: 1278.3260.

#### Compound 4f:

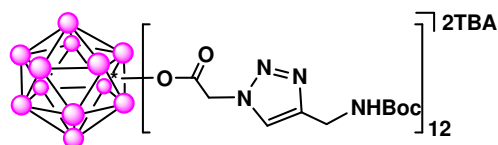

**4f** was synthesized from the azide functionalized closomer **3** (100 mg, 0.055 mmol), 5-N-Boc-propargylamine (512 mg, 3.30 mmol), copper (I) iodide (126 mg, 0.660 mmol) and Diisopropylethylamine (853 mg, 6.60 mmol) using the general method for click reaction on closomers described in the article. Yield: 160 mg (79%).  $^1\text{H}$  NMR (500 MHz,  $\text{CDCl}_3$ ):  $\delta$  7.55 (s, 12H), 6.36 (broad s, 12H), 4.93 (s, 24H), 4.37 (d, 24H,  $J = 6\text{Hz}$ ), 3.19 (t, 16H,  $J = 8.5\text{Hz}$ ), 1.63 (m, 16H), 1.39 (s, 108H), 1.26 (m, 16H), 0.98 (t, 24H,  $J = 7.2\text{ Hz}$ ).  $^{13}\text{C}$  NMR (125 MHz,  $\text{CD}_3\text{CN}$ ):  $\delta$  165.61, 155.81, 145.90, 123.72, 78.49, 58.23, 51.80, 35.7, 27.58, 23.21, 19.24 and 12.73.  $^{11}\text{B}$  NMR (96 MHz,  $\text{CD}_3\text{CN}$ ):  $\delta$  -16.34. HRMS (m/z): Calcd. for  $\text{C}_{120}\text{H}_{144}\text{B}_{12}\text{N}_{36}\text{O}_{72}$  ( $\text{M}^{2-}$ ) 1596.2171. Found: 1596.1645.

#### Compound 4g:

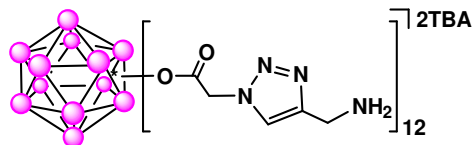

Closomer **4f** (80 mg, 0.020 mmol) was taken in an 100 mL round bottom flask and 20% trifluoroacetic acid/dichloromethane (10 mL) was added to it. The reaction mixture was stirred at  $0^\circ\text{C}$  for 1.5 hrs under an ensuing argon atmosphere. The reaction mixture so obtained was concentrated under high vacuum using a liquid  $\text{N}_2$  trap. The crude product

thus obtained was triturated with ether and used directly in the next step without any further purification. Crude yield: 80 mg.  $^1\text{H}$  NMR (500 MHz,  $\text{CD}_3\text{OD}$ ):  $\delta$  7.93 (s, 12H), 5.1 (s, 24H), 4.42 (s, 24H), (undesired peaks at 5.19, 3.3 and 1.58 ppm are attributed to methanol and water; undesired peaks at 3.74, 3.23 and 1.37 ppm are attributed to diisopropylamine).  $^{13}\text{C}$  NMR (400 MHz,  $\text{CD}_3\text{OD}$ ):  $\delta$  166.02, 126.72, 87.50, 54.30, 51.71, 42.50, 34.07, 26.18, 17.17, 15.73 and 11.57(undesired additional peaks are attributed to methanol, water and diisopropylamine).  $^{11}\text{B}$  NMR (96 MHz,  $\text{CD}_3\text{OD}$ ):  $\delta$  -17.21. HRMS (m/z): Calcd. for  $\text{C}_{60}\text{H}_{84}\text{B}_{12}\text{N}_{48}\text{O}_{24}$  ( $\text{M}+4\text{H}$ ) $^{+2}$  997.4165. Found: 997.4799 and 664.60056 ( $\text{M}+5\text{H}$ ) $^{+3}$ .

#### Compound 4h:

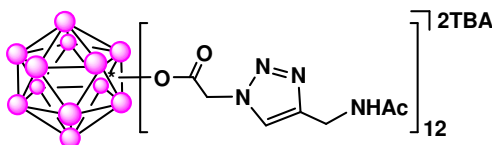

Crude N-Boc-protected closomer **4g** (crude from previous step, ~0.020 mmol) was taken in a dry 50 mL round bottom flask and 10 mL dry pyridine was added to it. To this mixture, acetic anhydride (266 mg, 2.60 mmol) was added at 0°C and the reaction mixture was slowly allowed to warm up to room temperature under continuous stirring. After stirring for 2 days under an ensuing argon atmosphere, the reaction mixture was concentrated to dryness and the crude mixture so obtained was purified on a size-exclusion column (Lipophilic Sephadex<sup>®</sup> LH-20) using acetonitrile as the eluent. Yield: 40 mg (62% over two steps).  $^1\text{H}$  NMR (500 MHz,  $\text{CD}_3\text{OD}$ ):  $\delta$  7.76 (s, 12H), 5.06 (s, 24H), 4.50 (s, 24H) and 1.94 (s, 36H).  $^{11}\text{B}$  NMR (96 MHz,  $\text{CD}_3\text{OD}$ ):  $\delta$  -17.11. HRMS (m/z): Calcd. for  $\text{C}_{84}\text{H}_{108}\text{B}_{12}\text{N}_{48}\text{O}_{36}$  ( $\text{M}$ ) $^{-2}$  1247.89415. Found: 1247.7986.



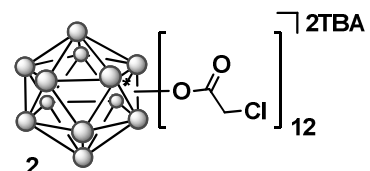

$^{11}\text{B}$  NMR (160 MHz,  $\text{CDCl}_3$ )

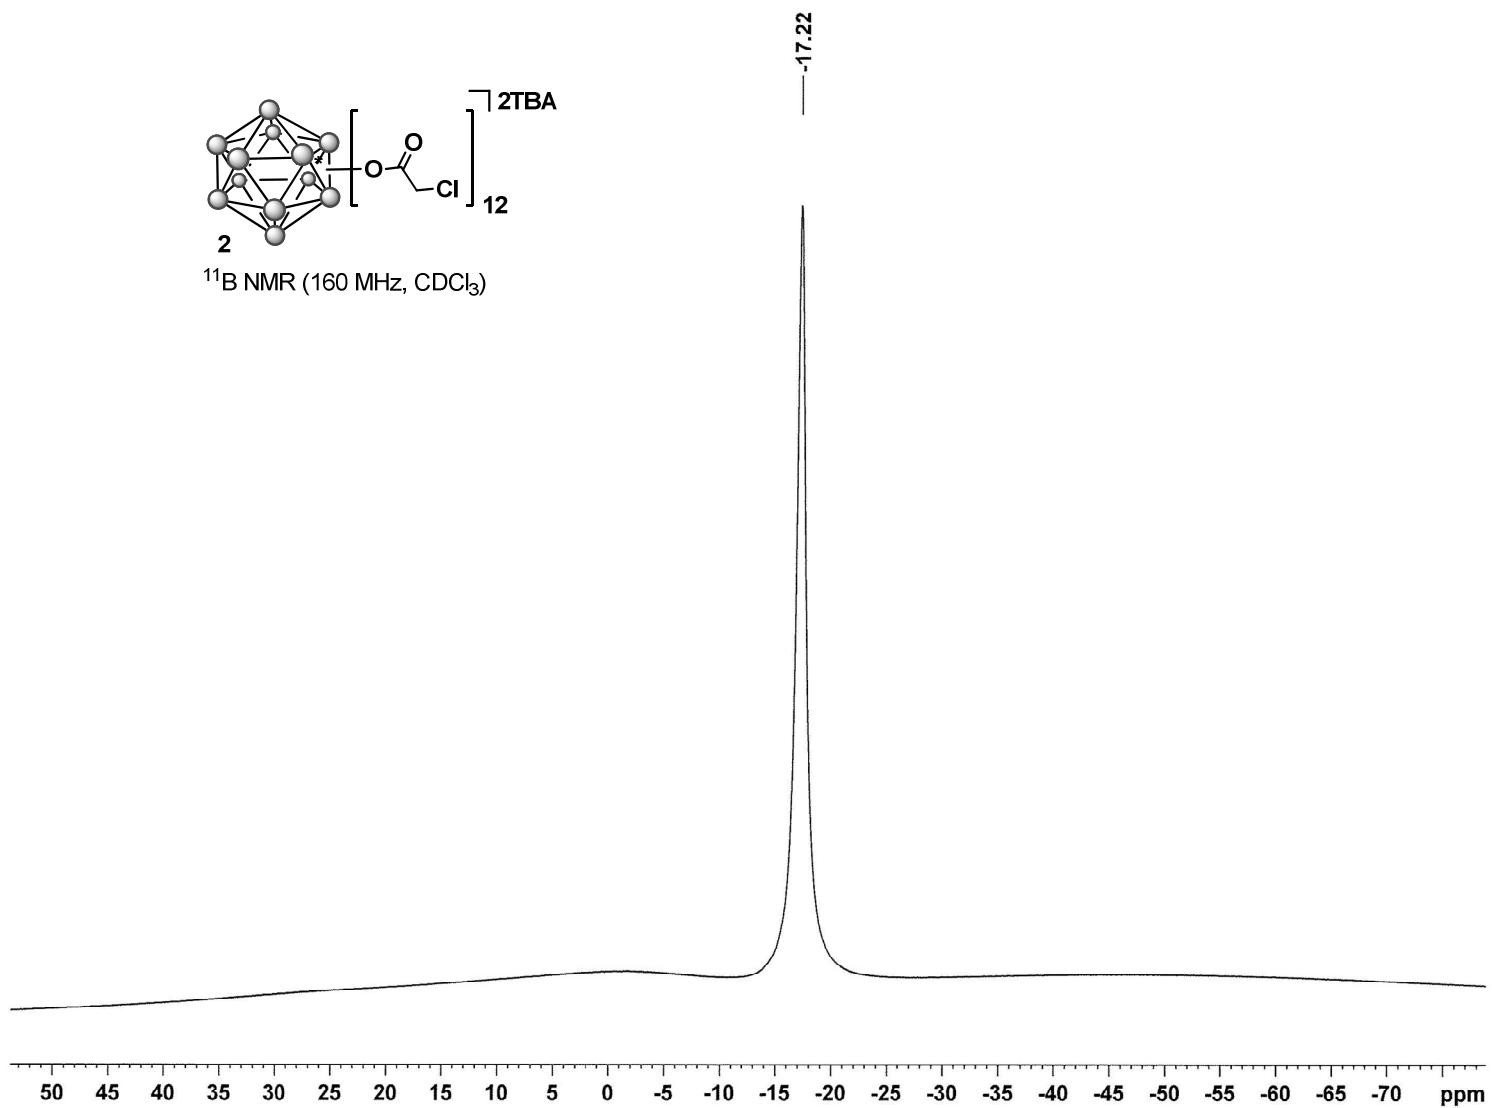

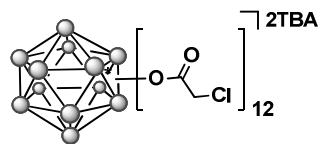

2  
<sup>1</sup>H NMR (500 MHz, CDCl<sub>3</sub>)

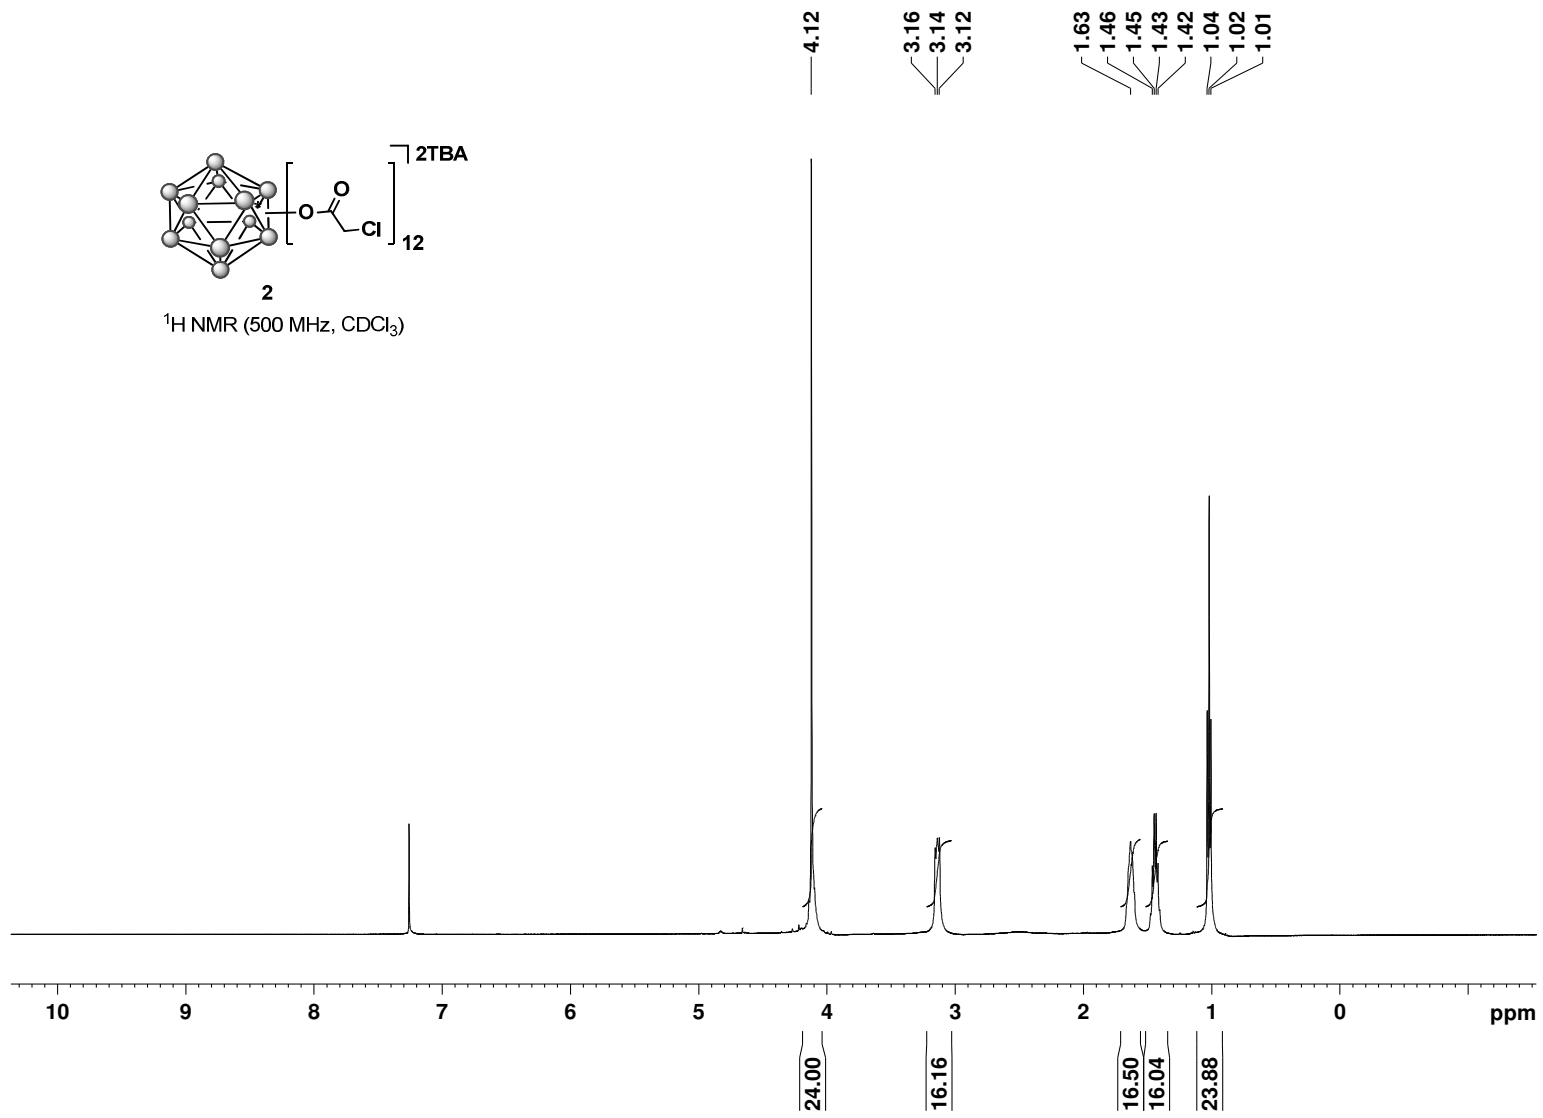

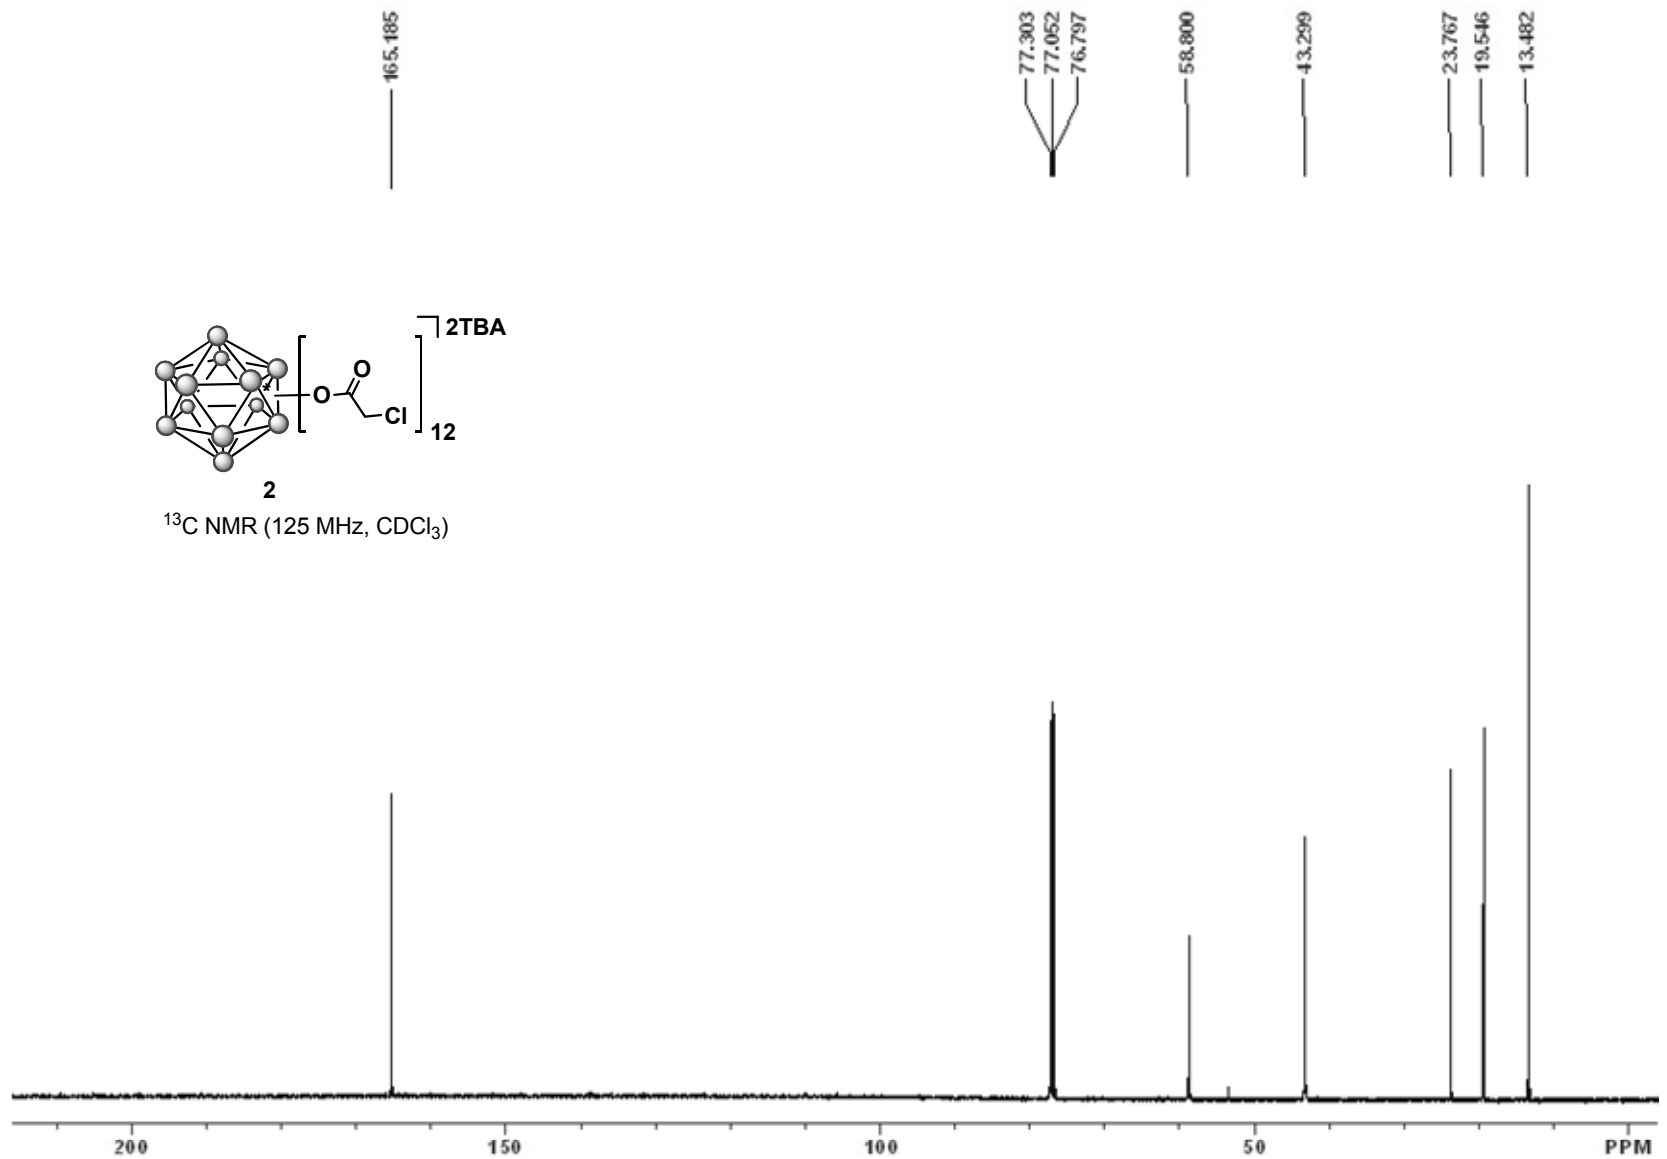

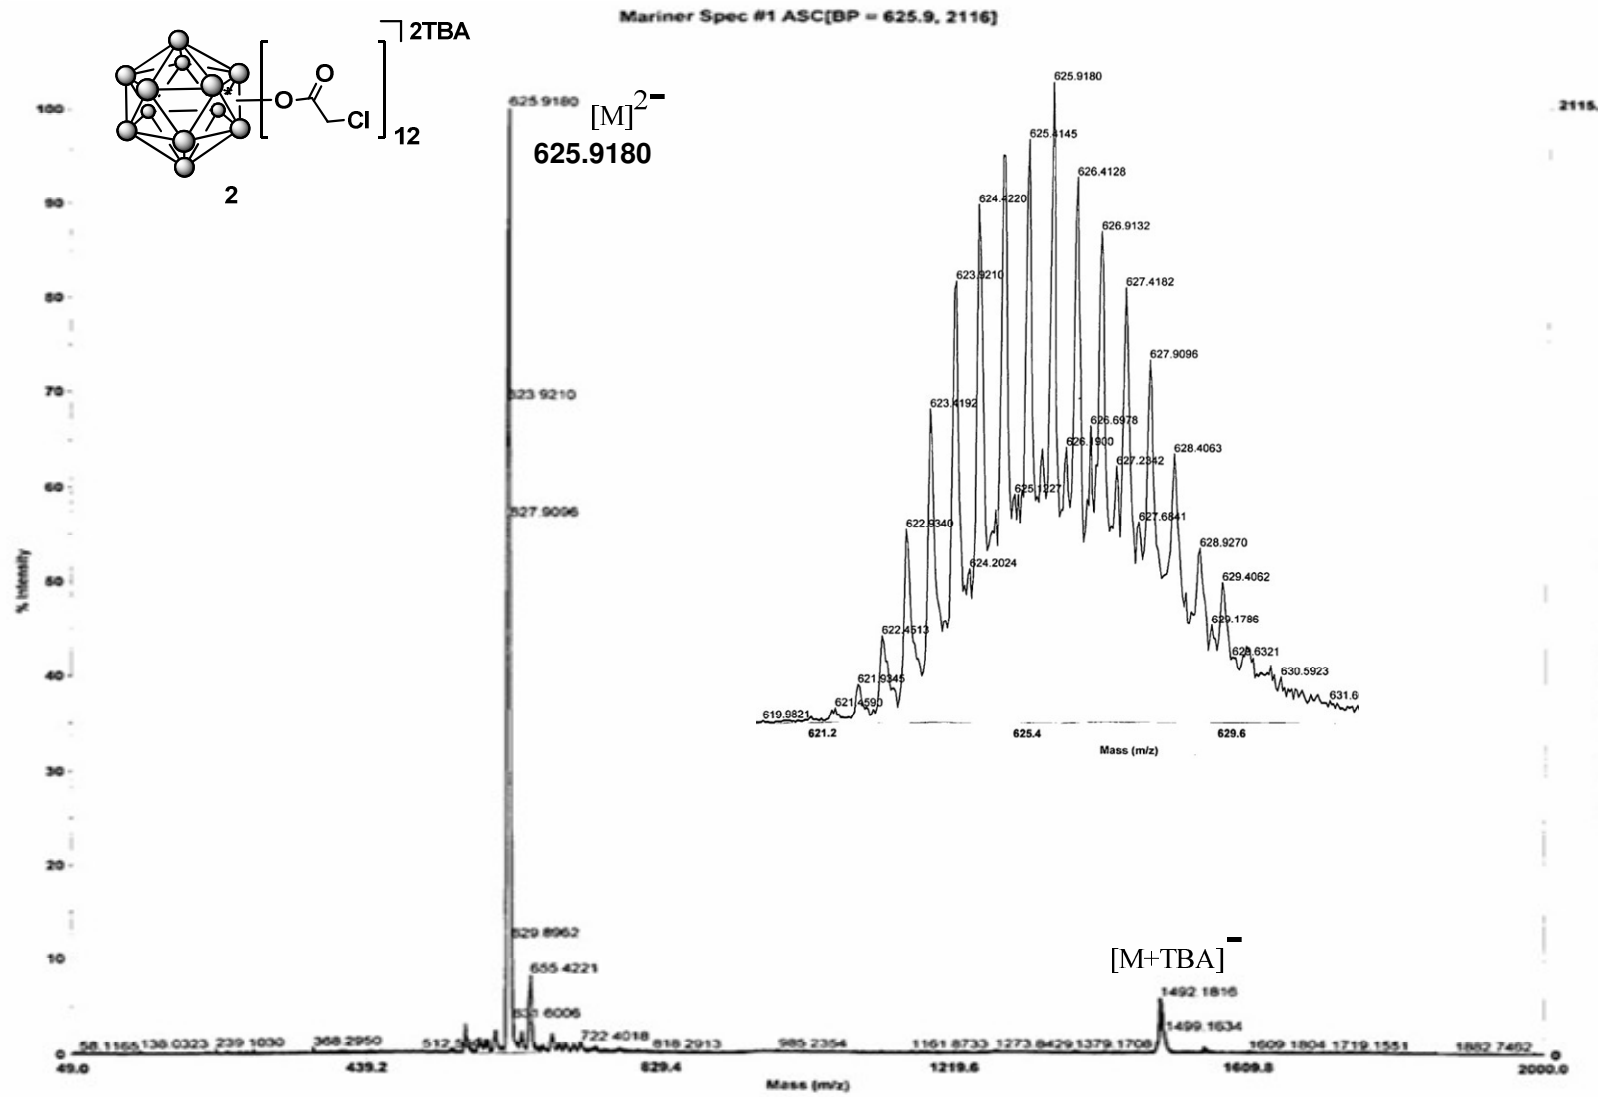

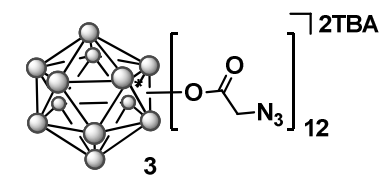

$^{11}\text{B}$  NMR (160 MHz,  $\text{CD}_3\text{CN}$ )

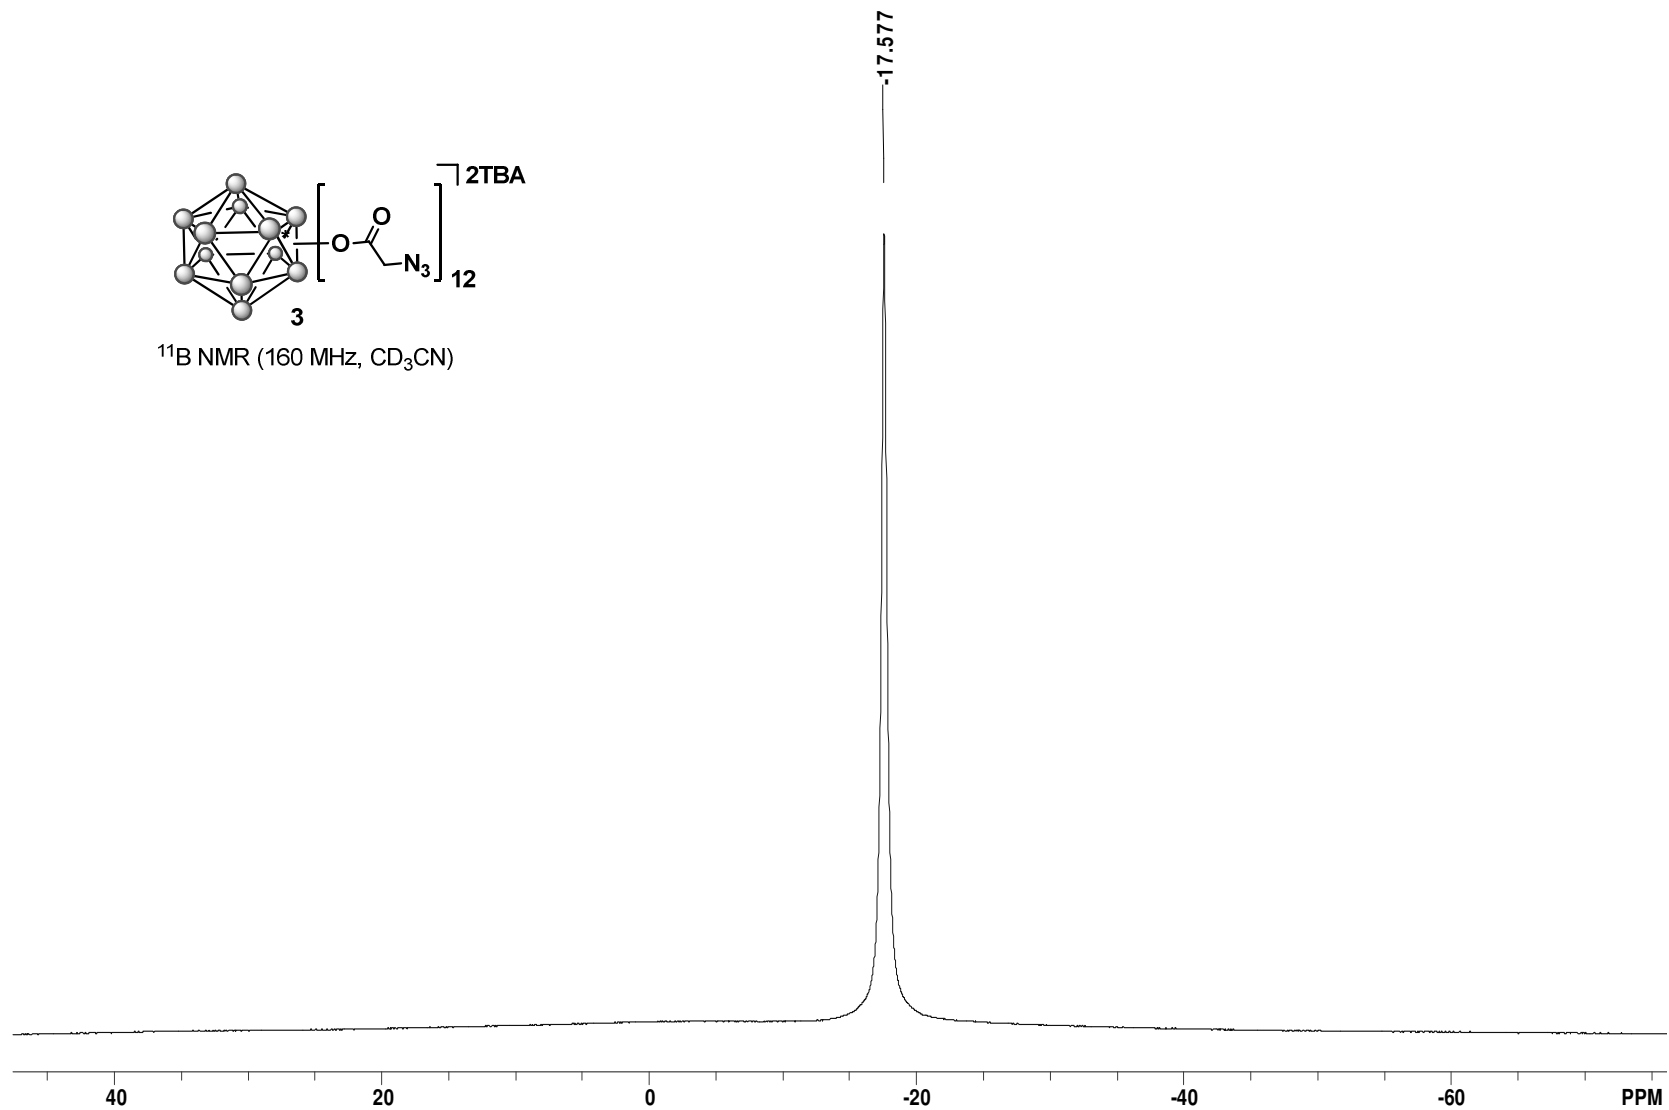

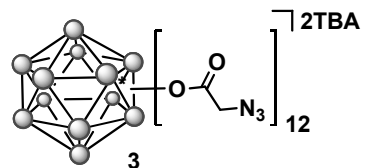

$^1\text{H NMR}$  (500 MHz,  $\text{CD}_3\text{CN}$ )

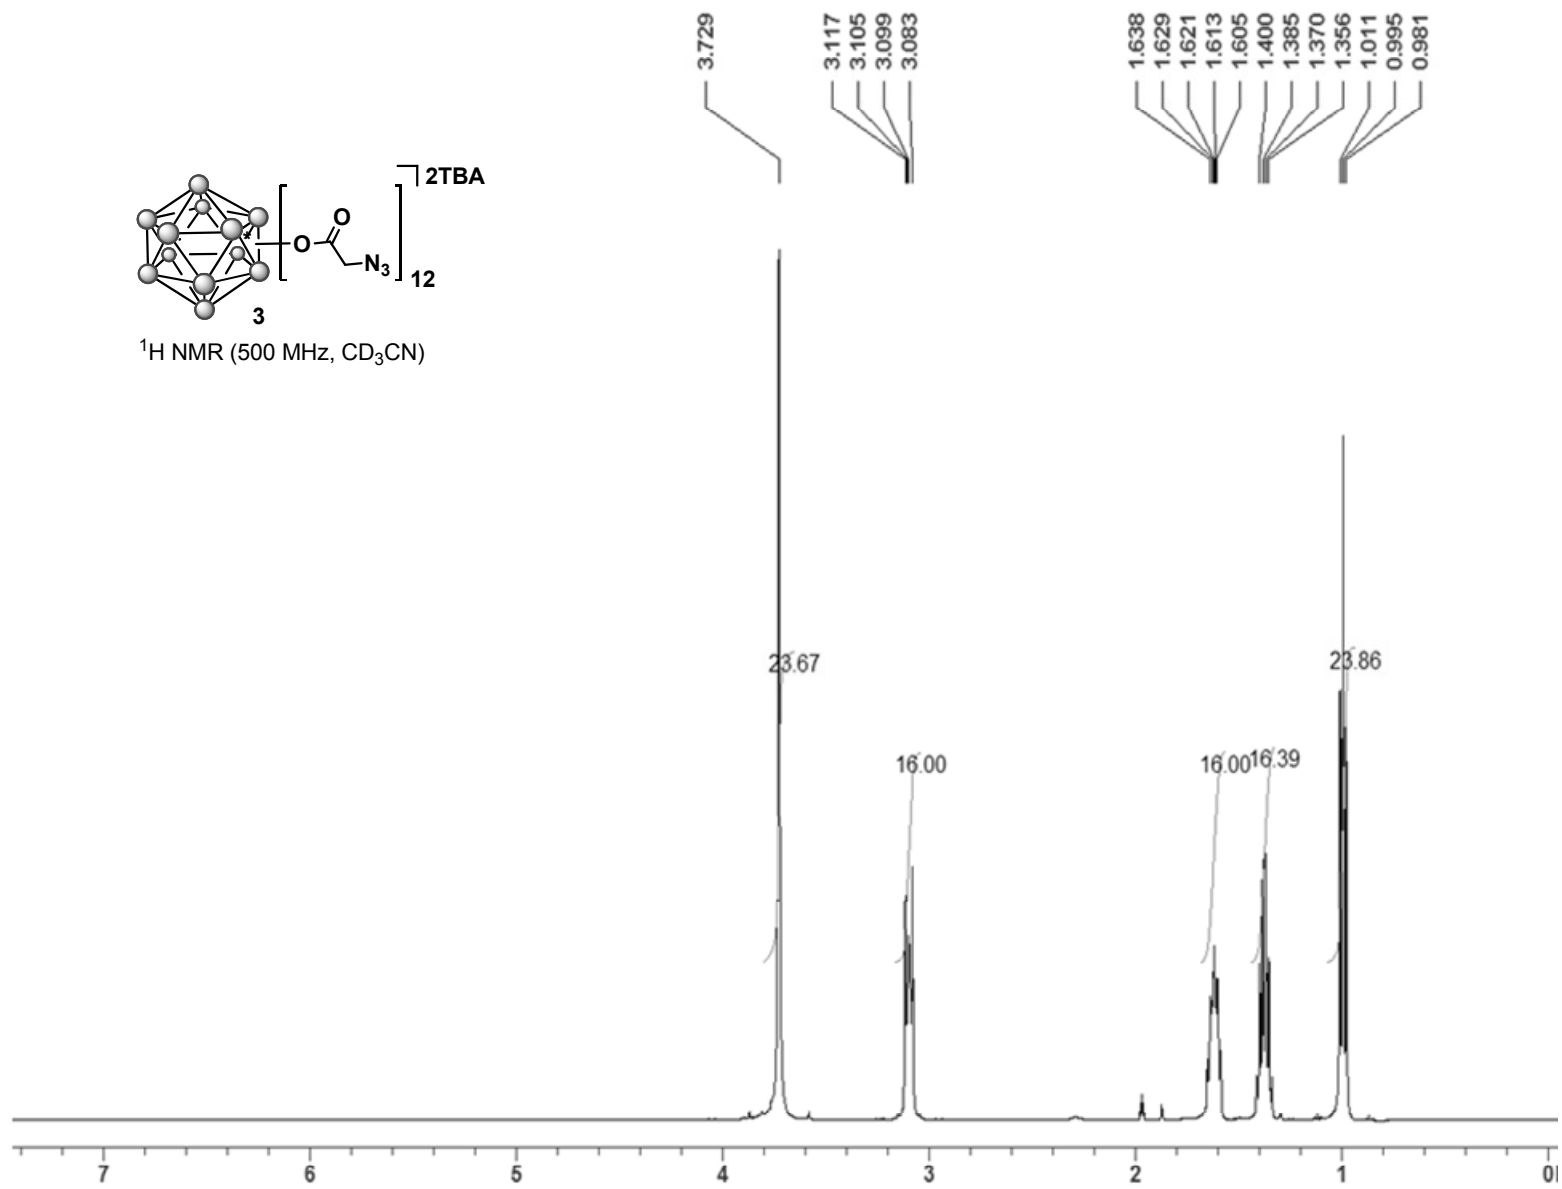

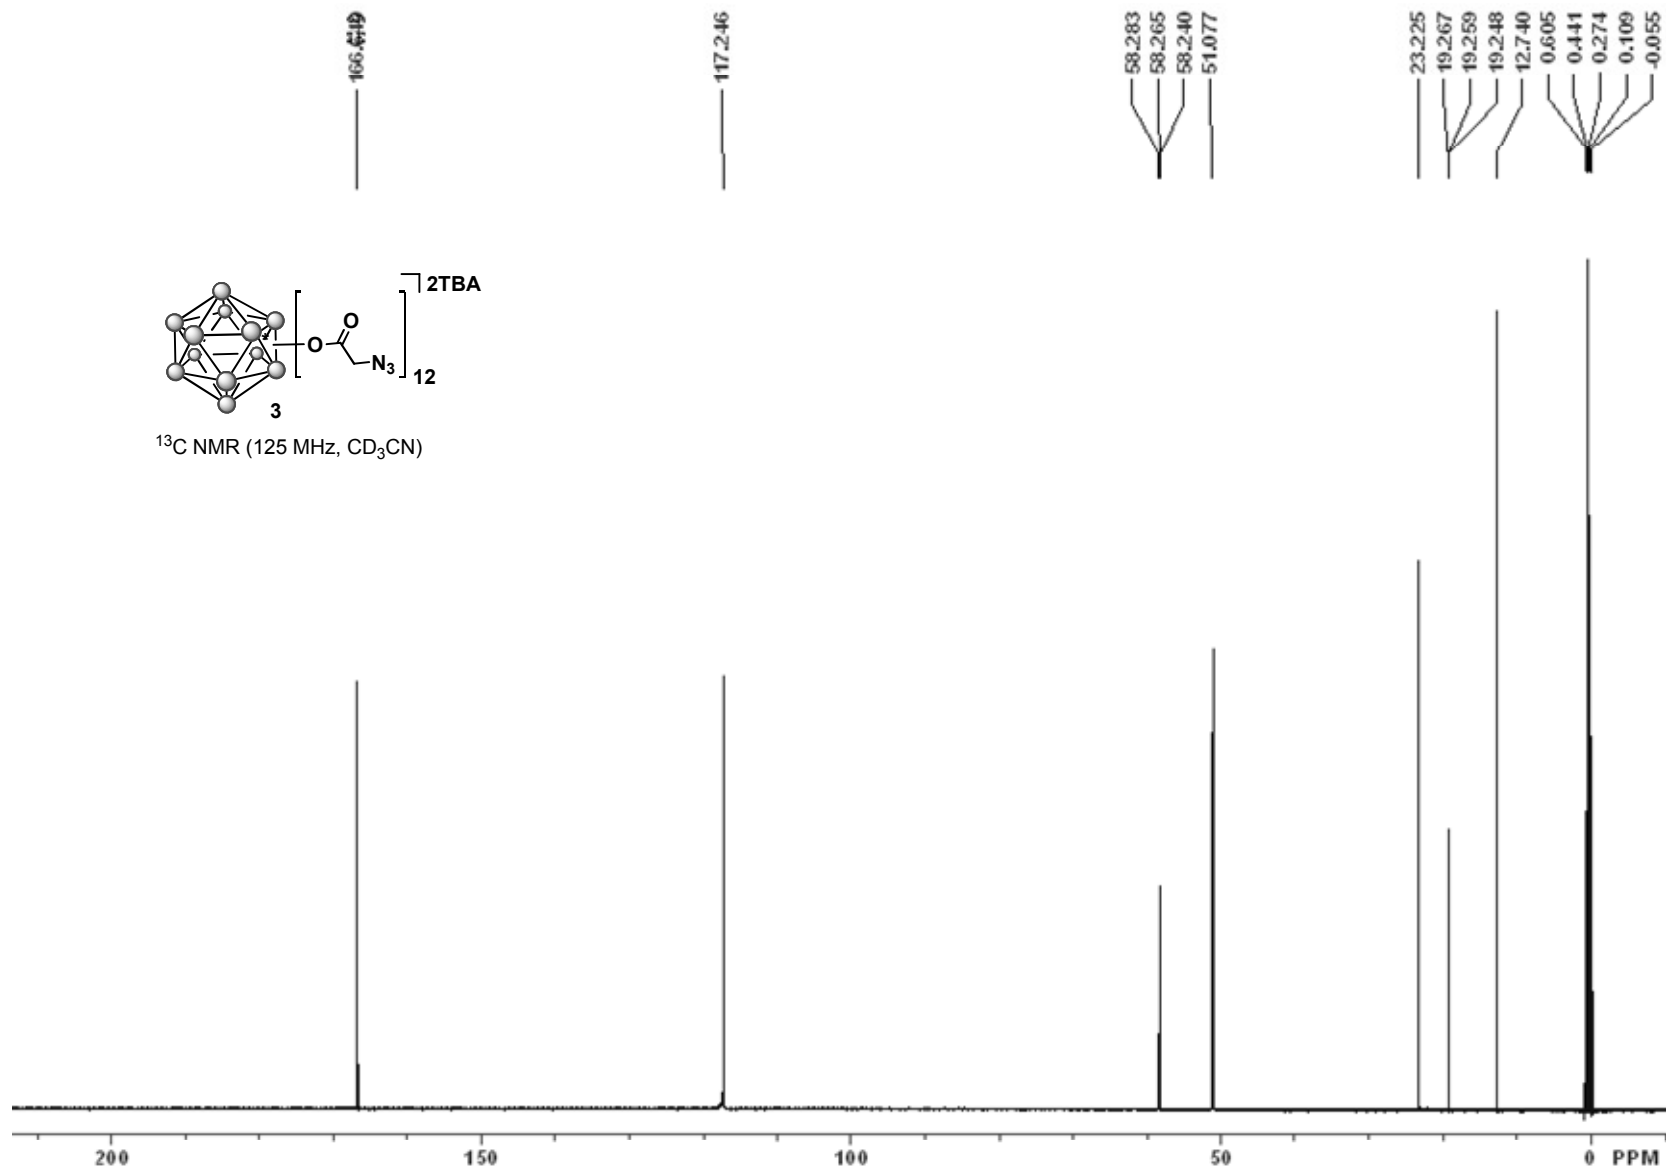

Mariner Spec /1:31 ASC[BP = 665.0, 1599]

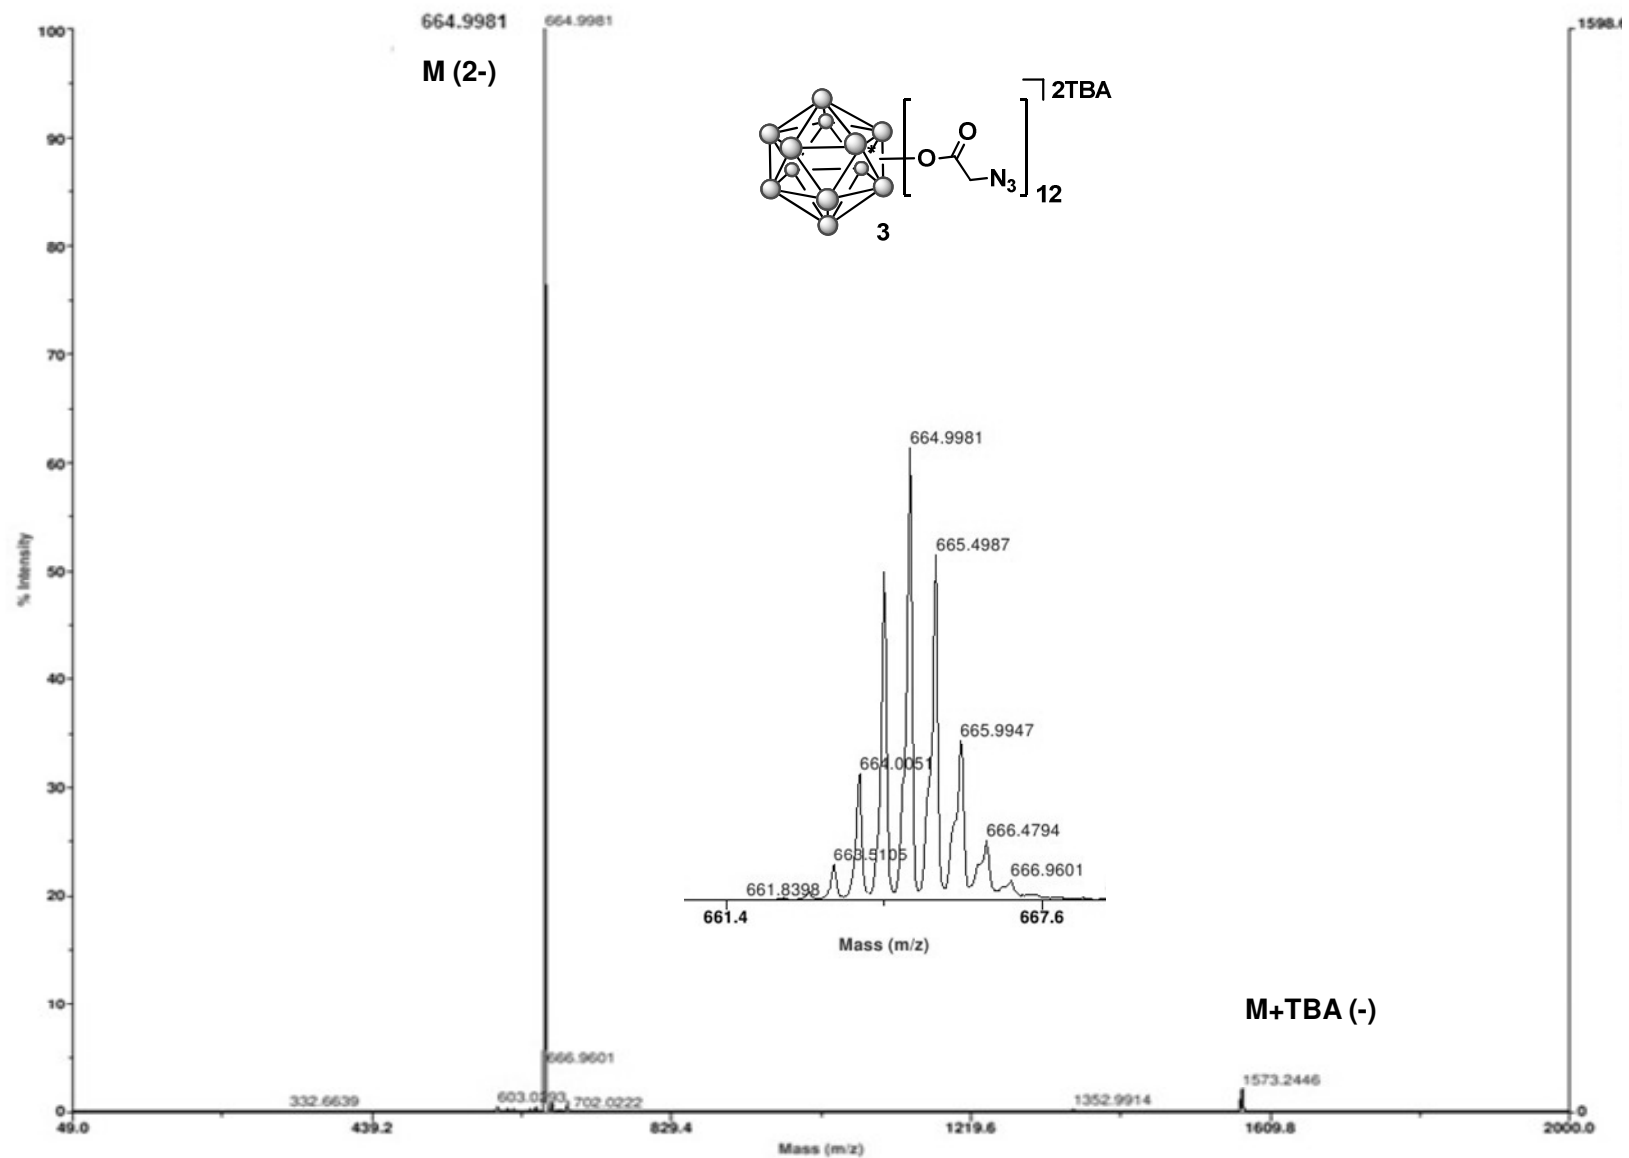

S15



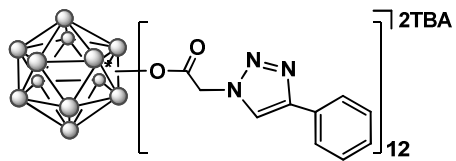

4a  $^{11}\text{B}$  NMR (96 MHz,  $\text{CD}_3\text{CN}$ )

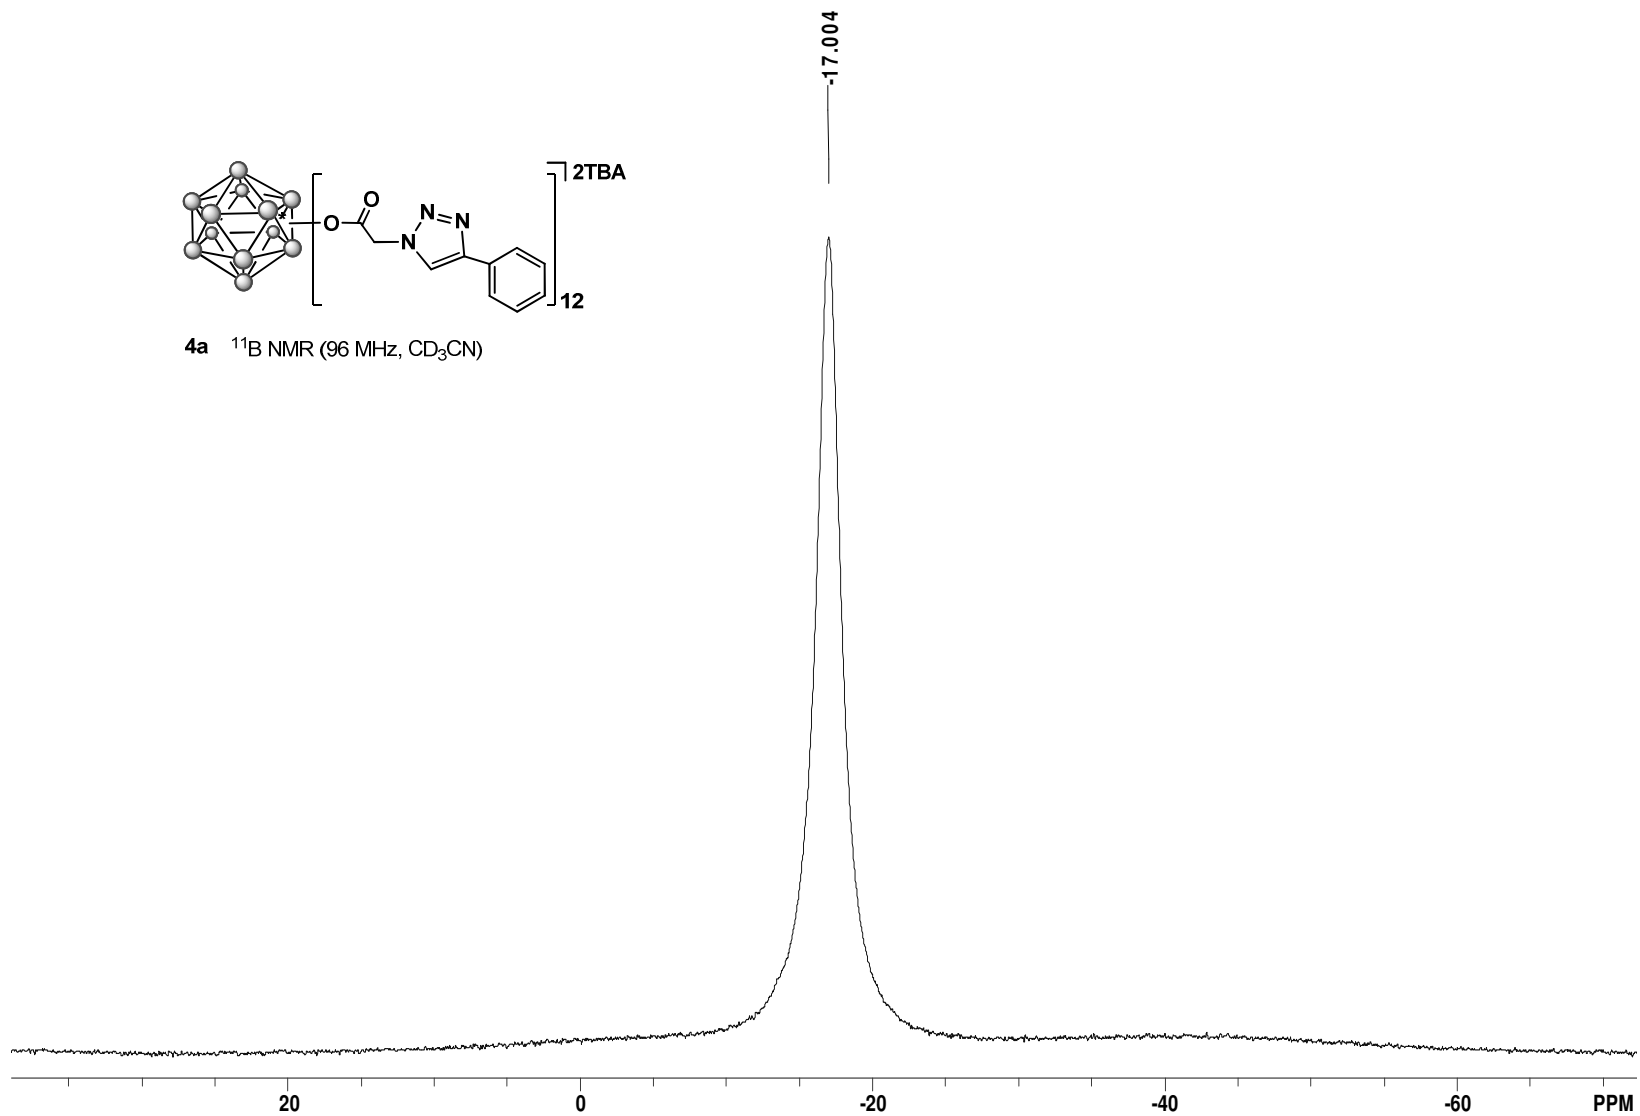

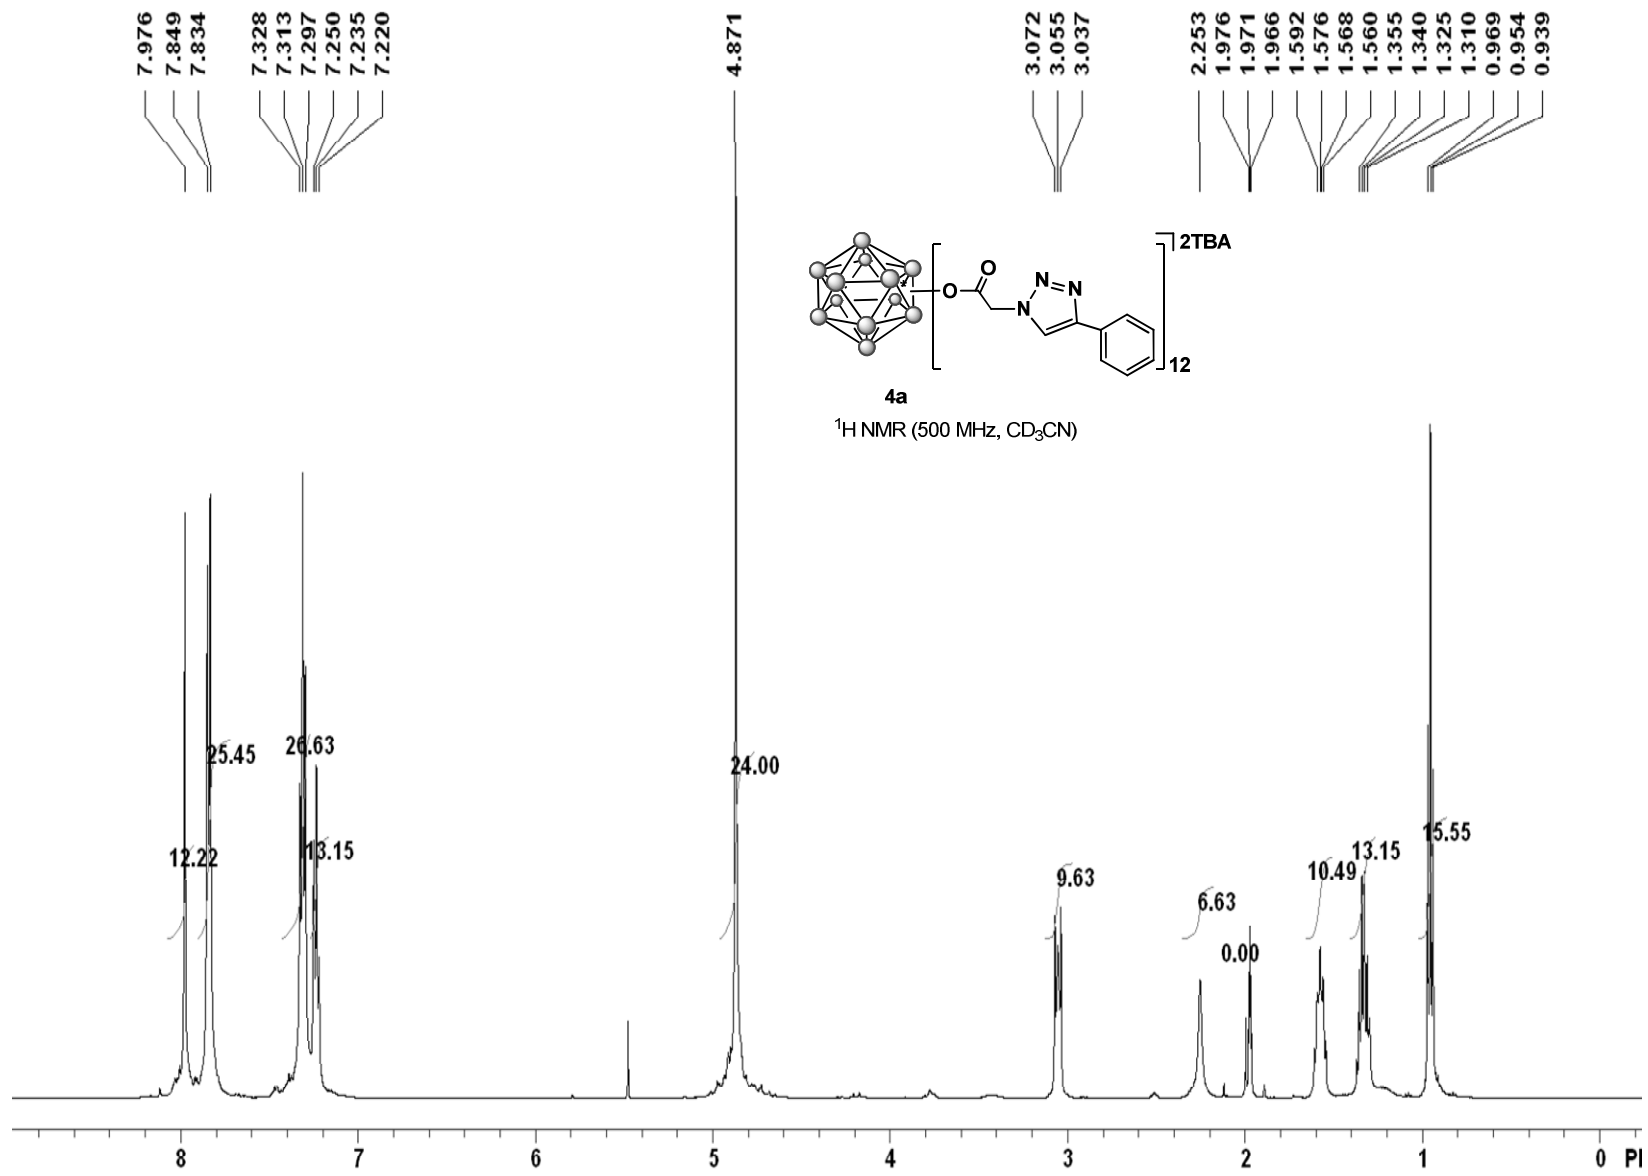

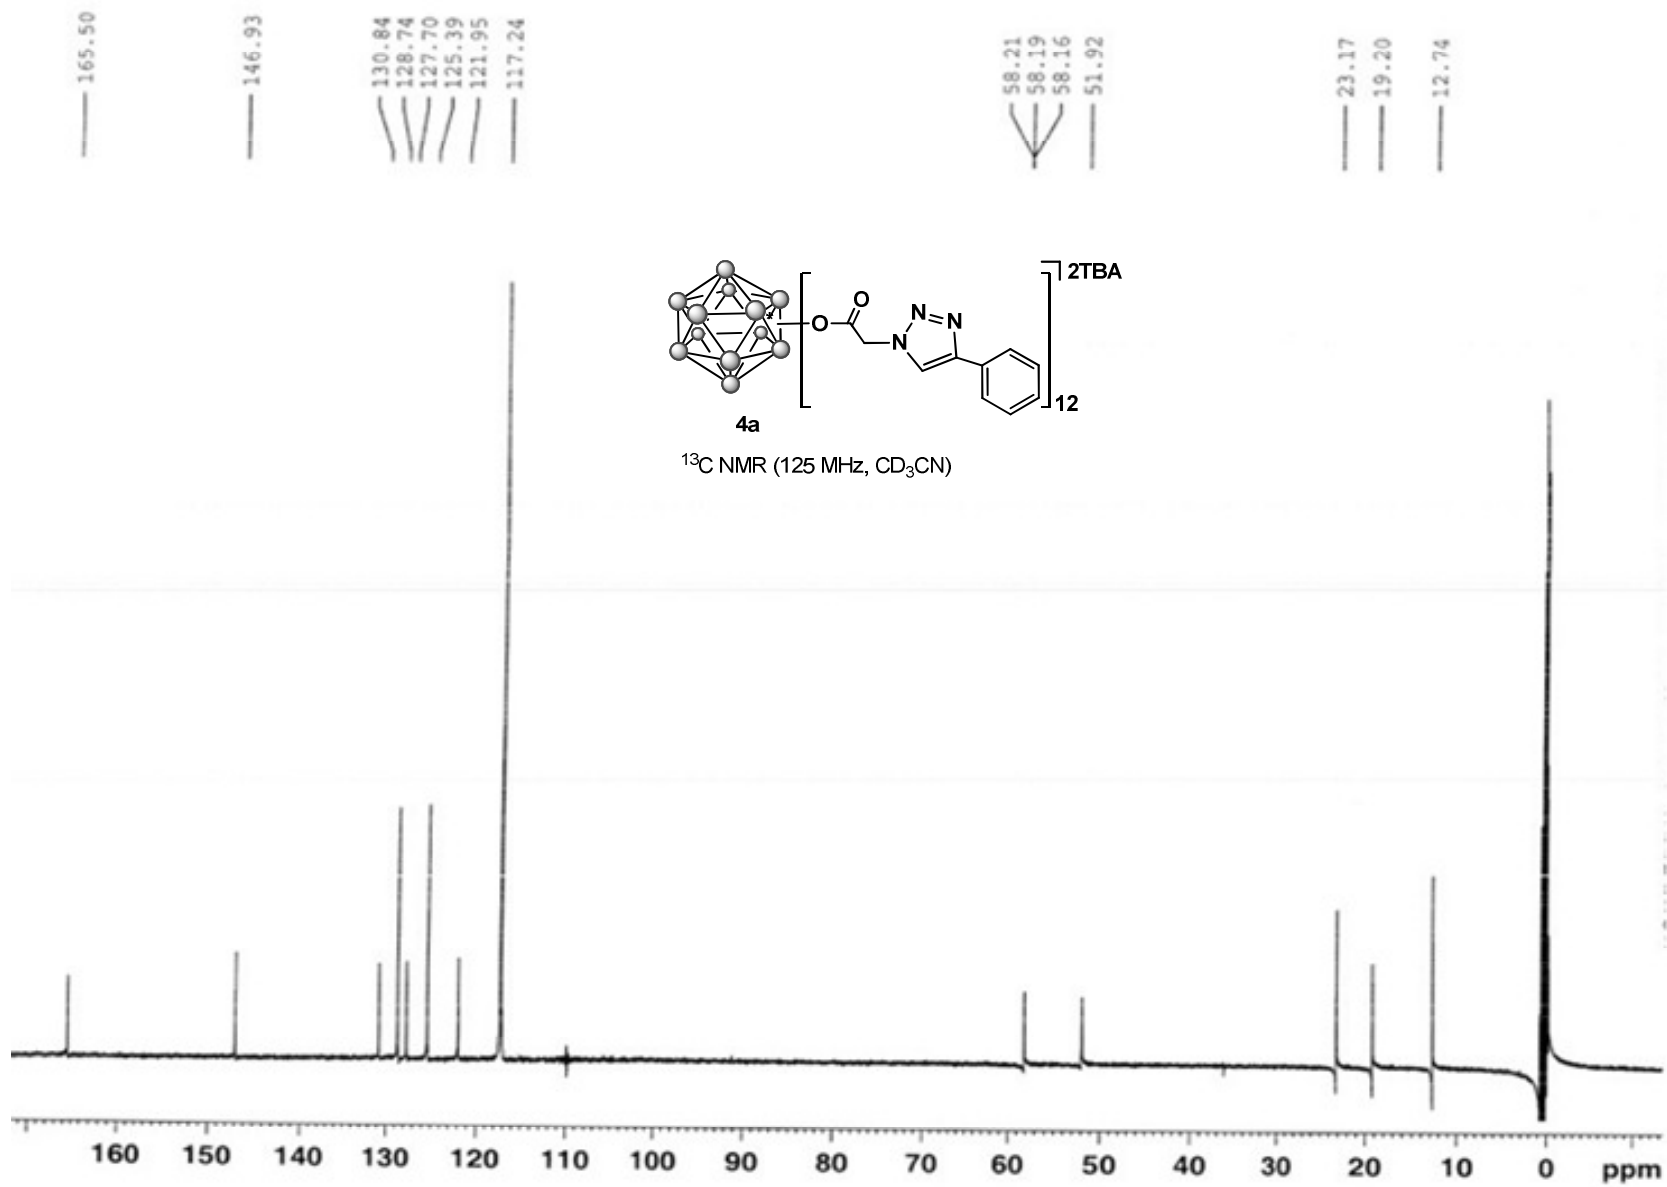

Mariner Spec #1 ASC[BP = 1278.4, 1029]

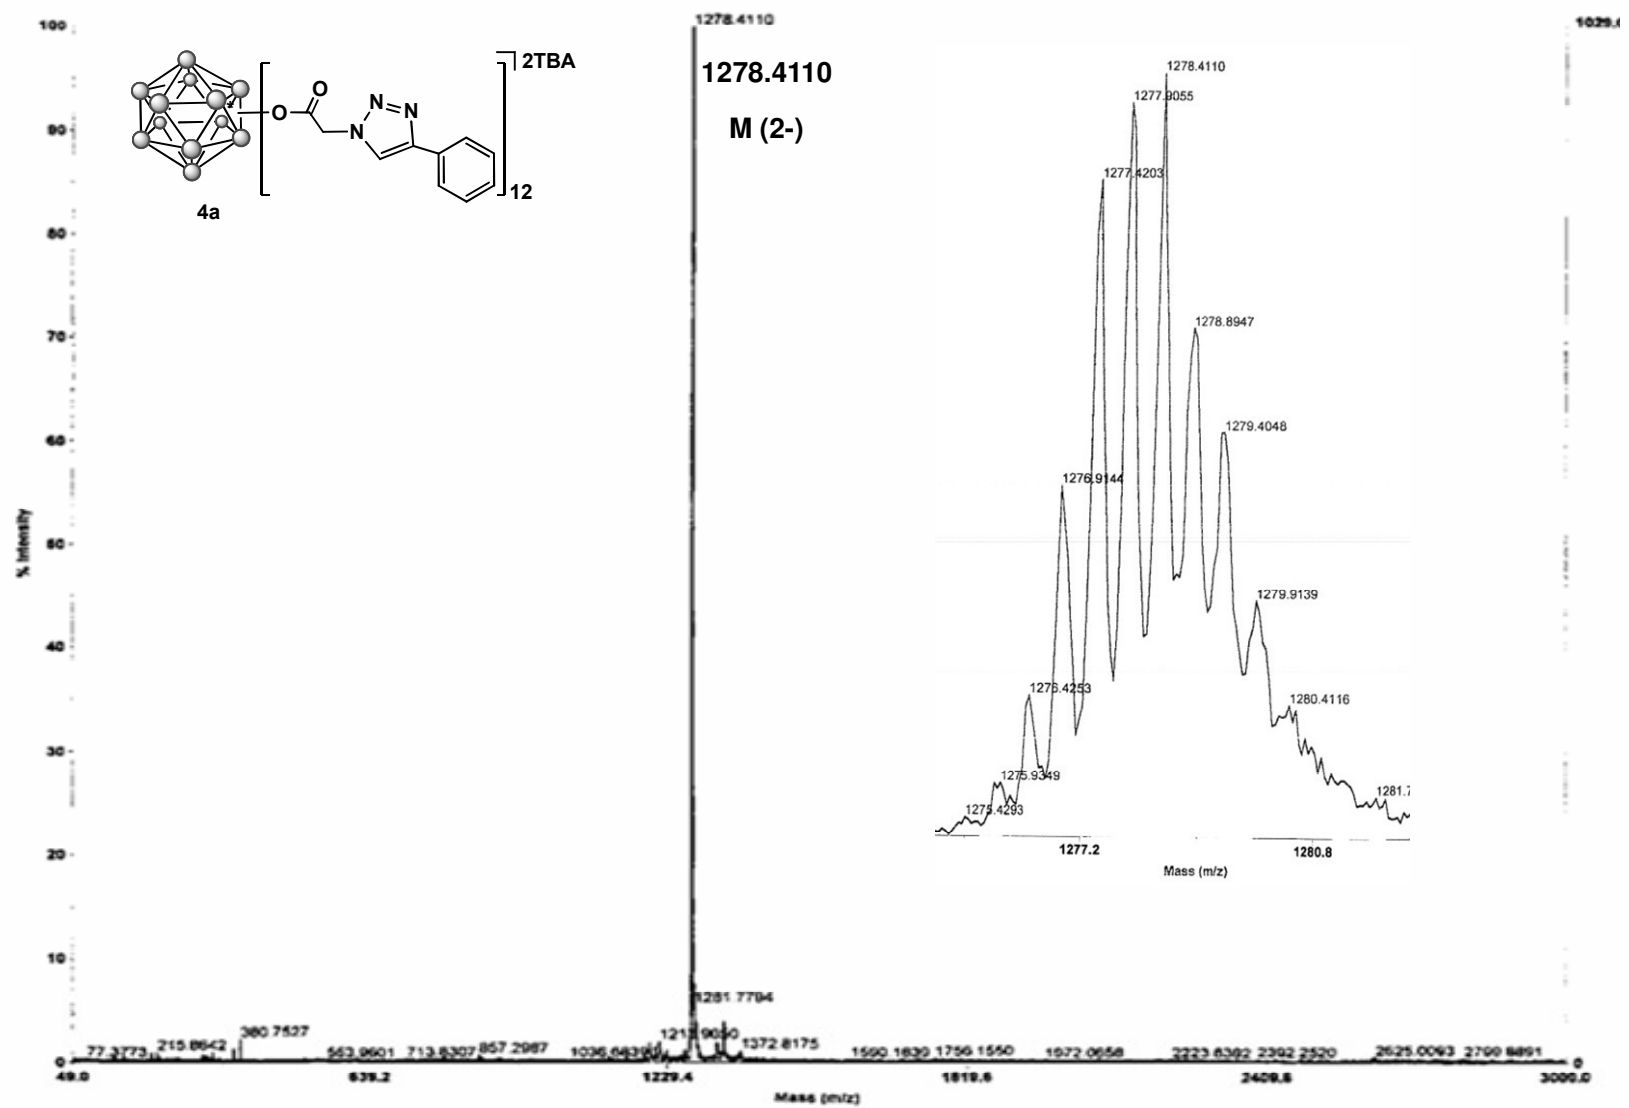

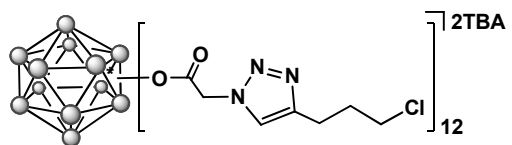

4e <sup>11</sup>B NMR (128 MHz, CD<sub>3</sub>CN)

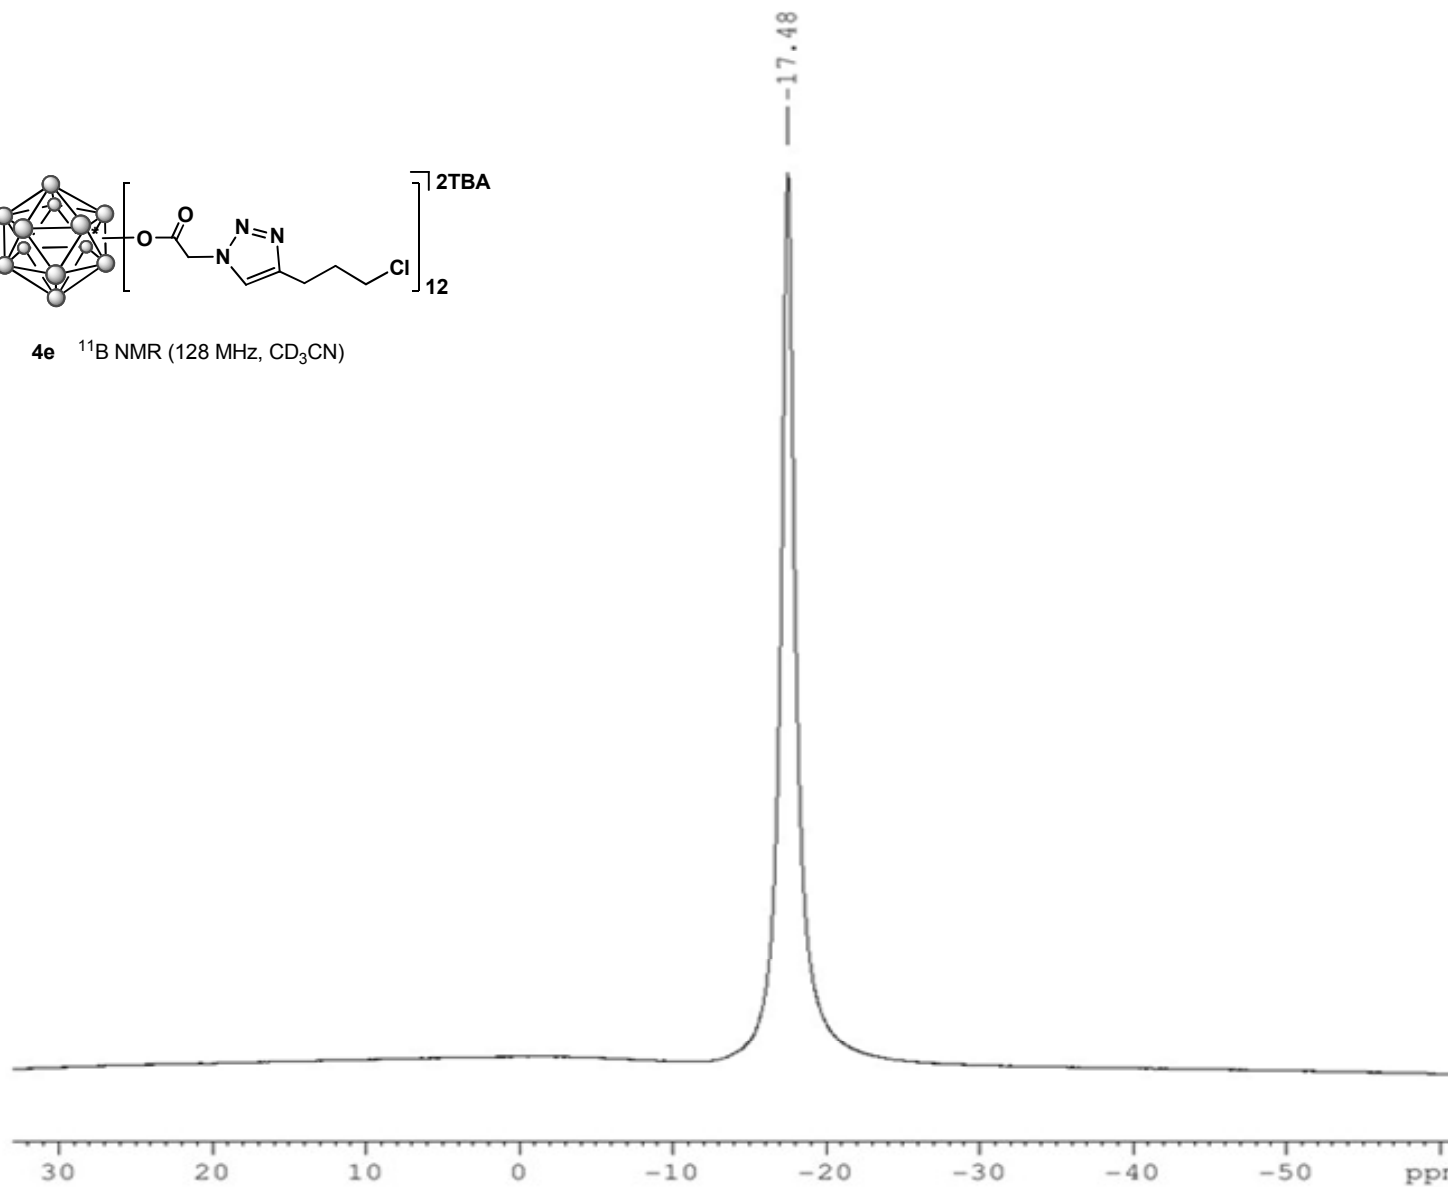

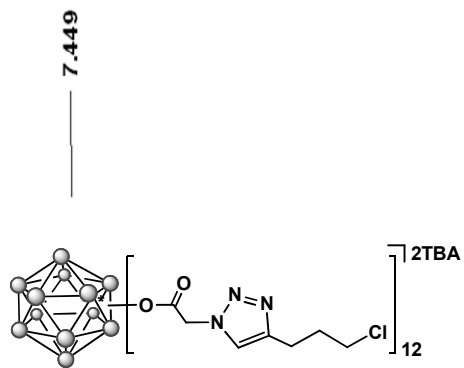

4e <sup>1</sup>H NMR (400 MHz, CD<sub>3</sub>CN) TBA impurity

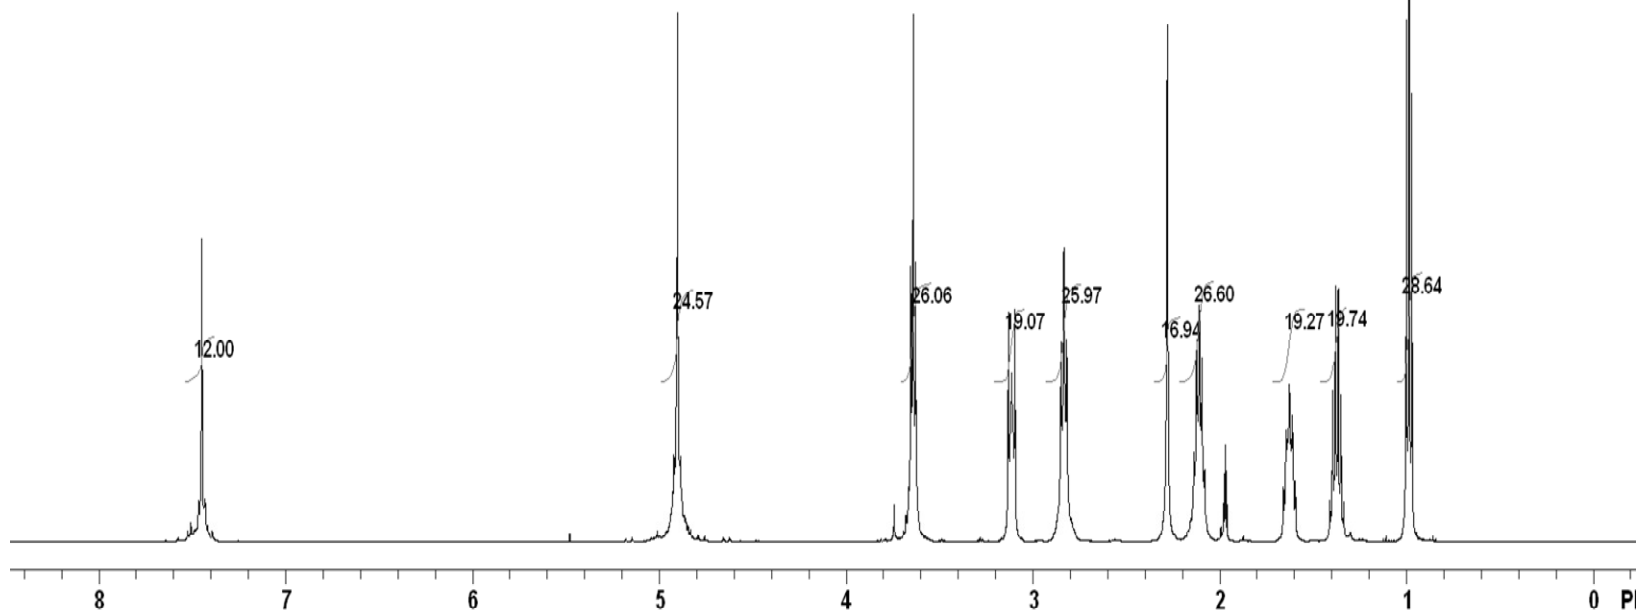

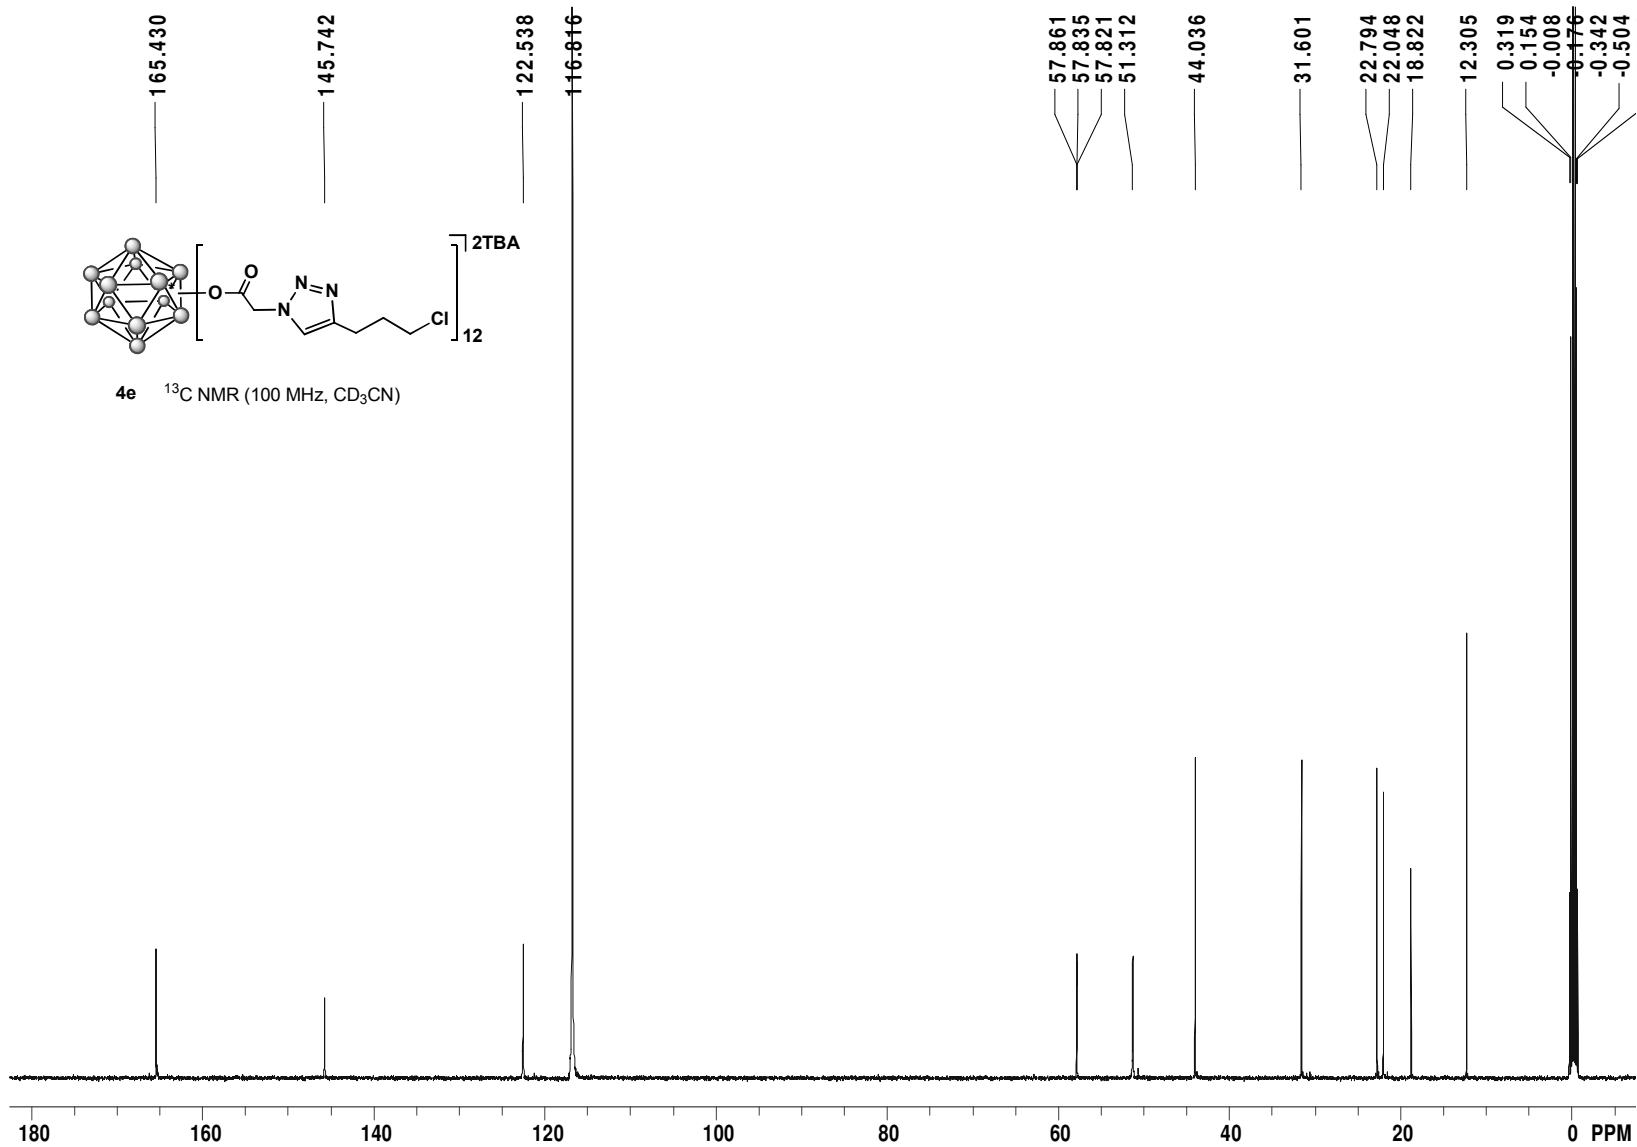

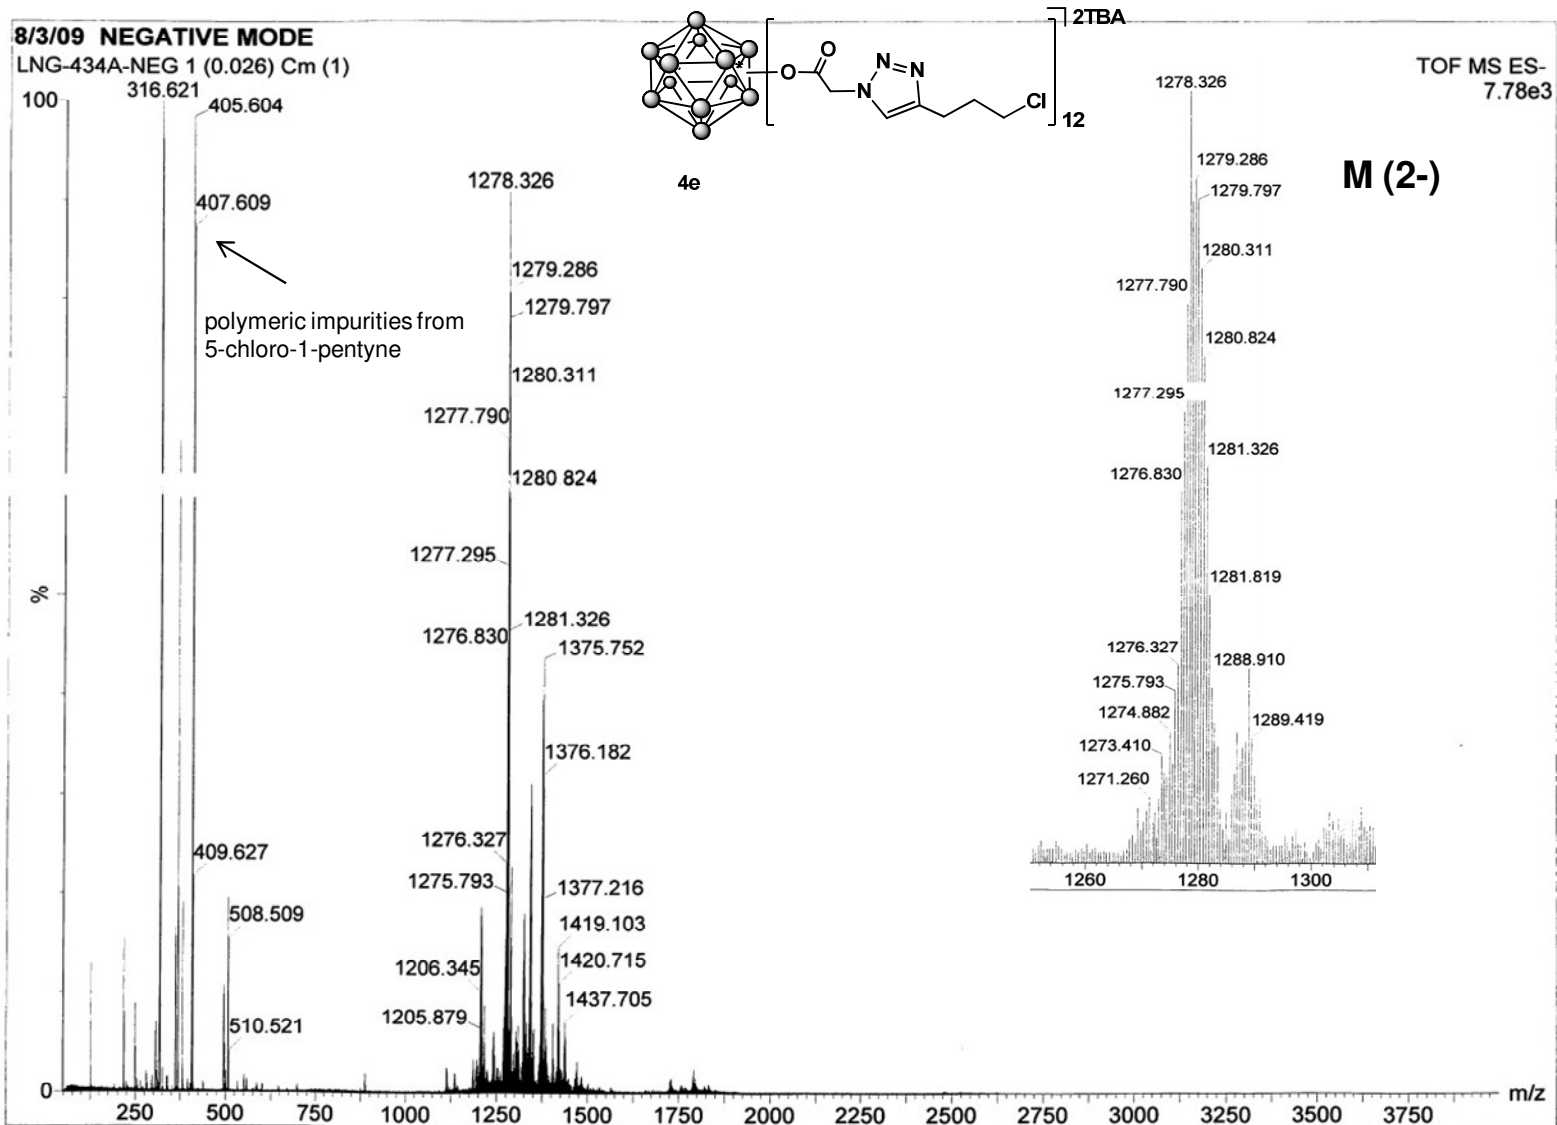



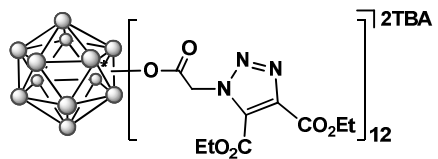

4d <sup>11</sup>B NMR (128 MHz, CD<sub>3</sub>CN)

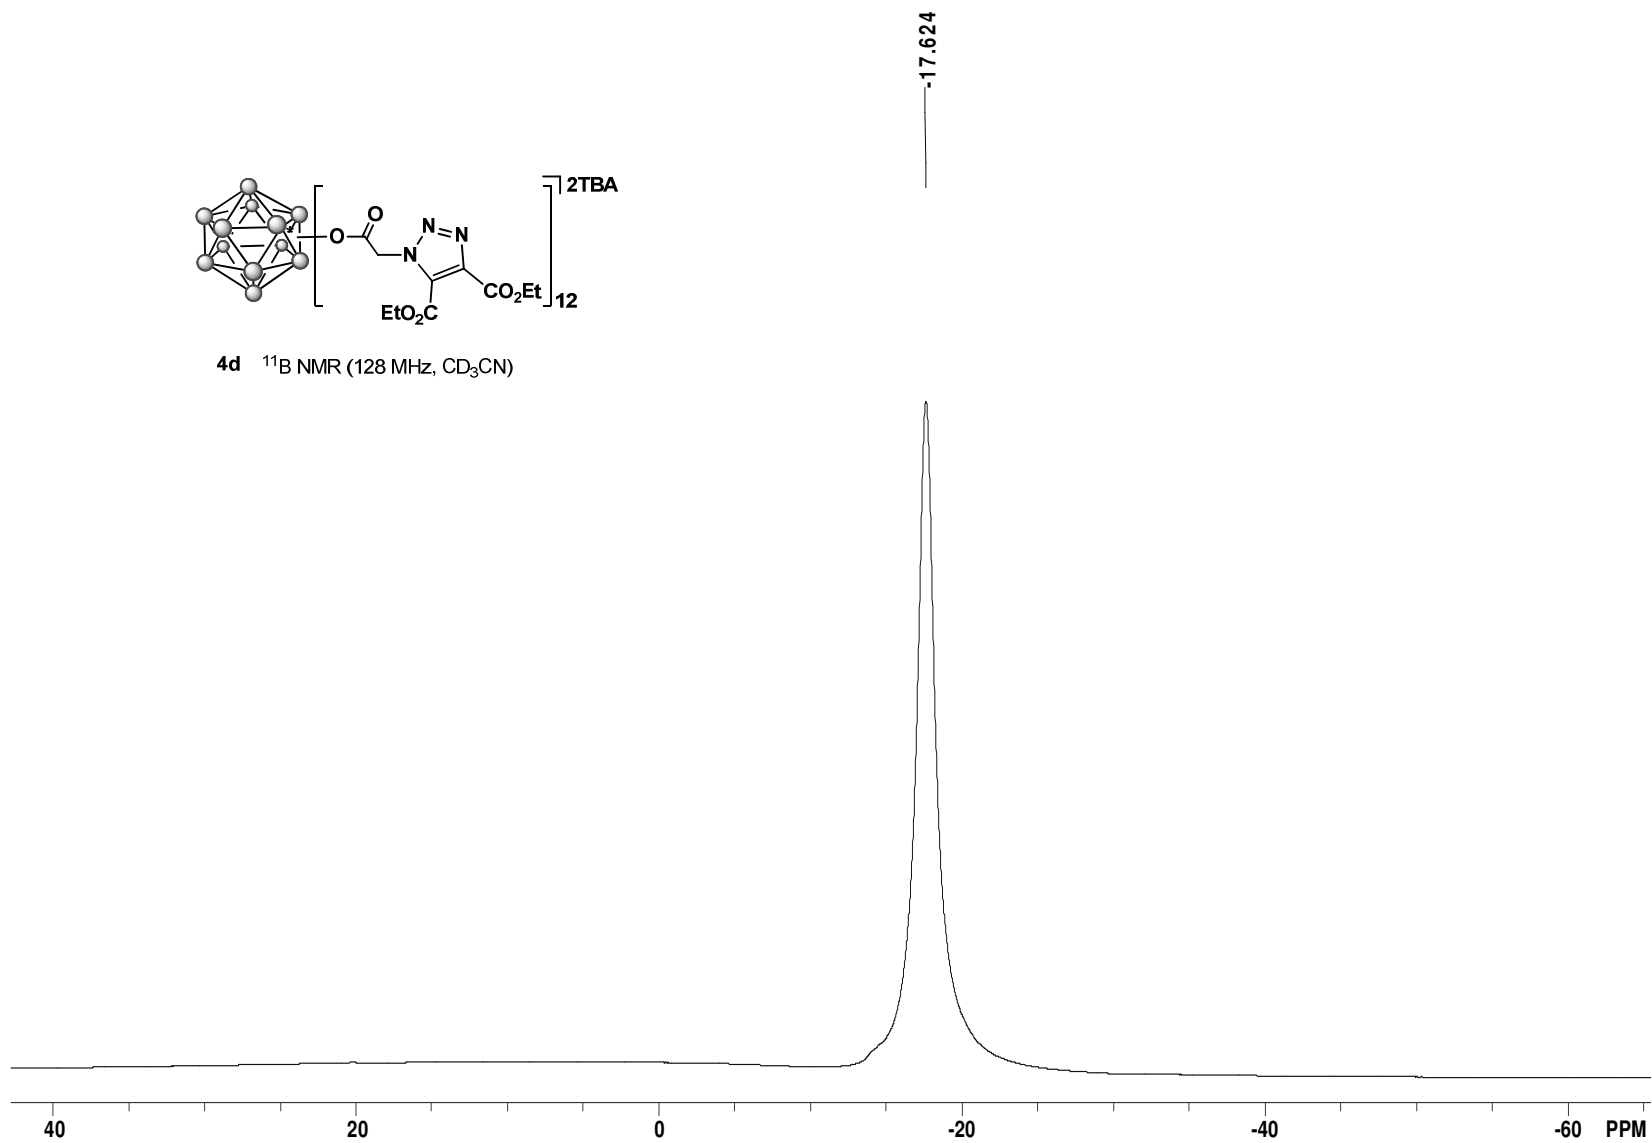

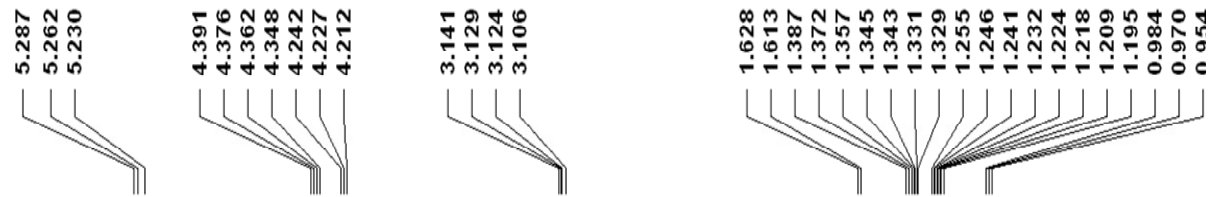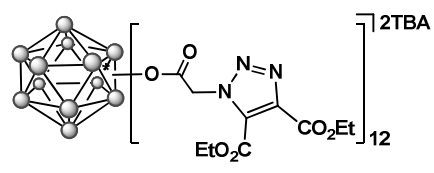

4d <sup>1</sup>H NMR (400 MHz, CD<sub>3</sub>CN)

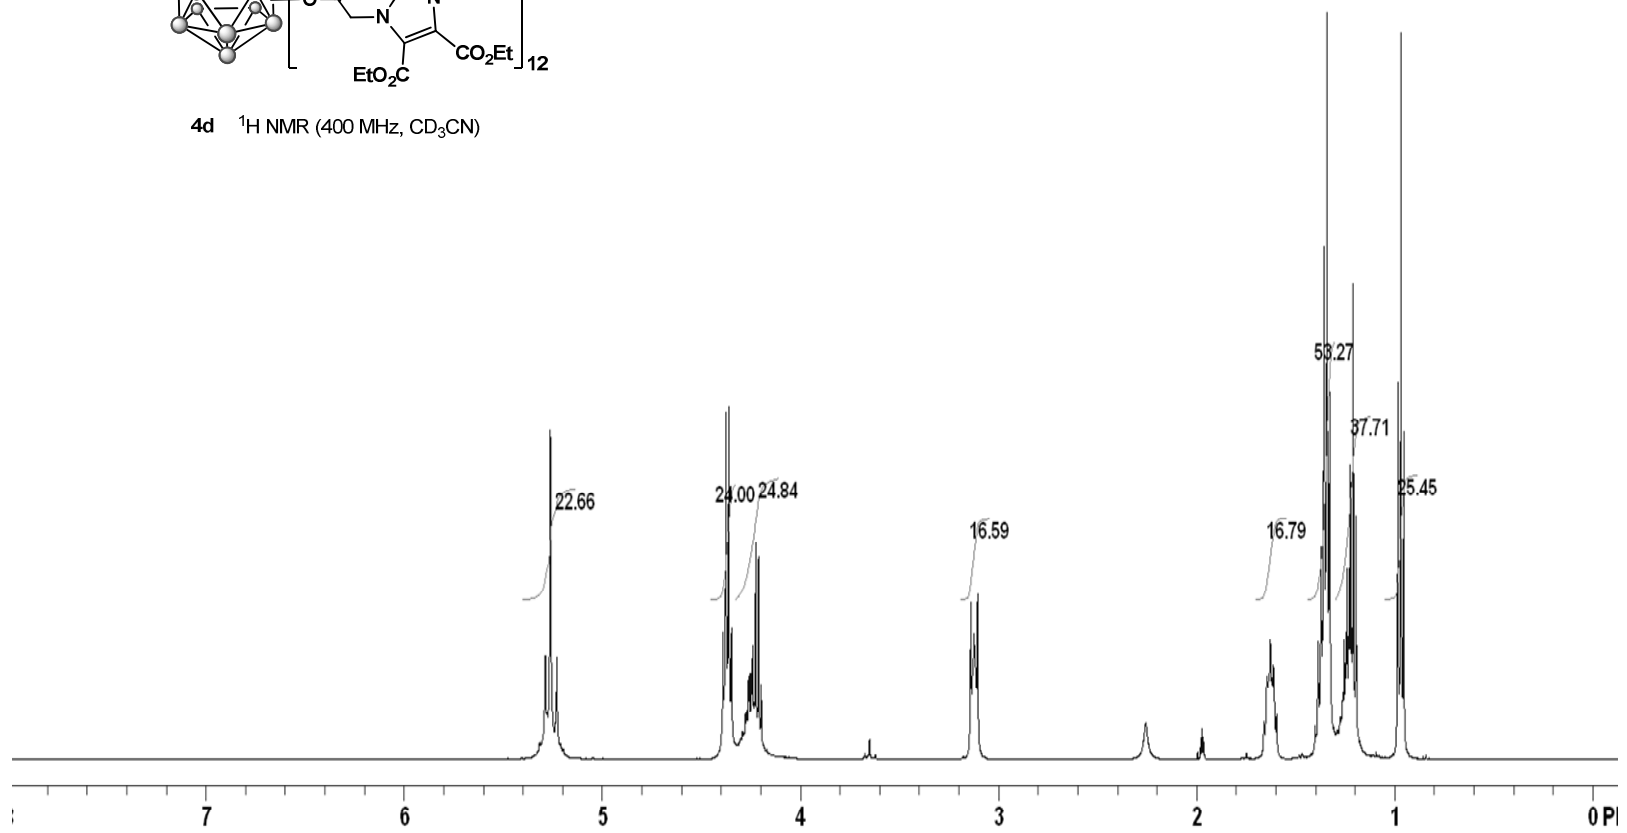

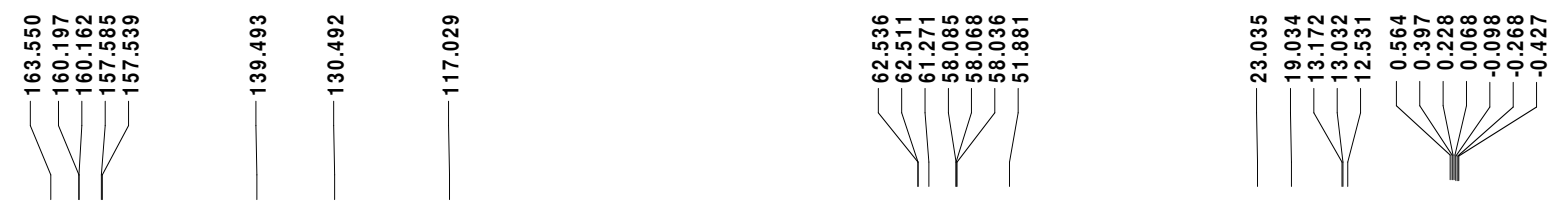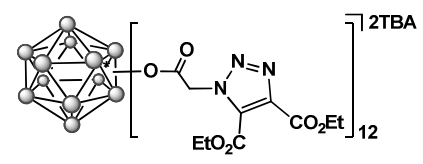

4d <sup>13</sup>C NMR (100 MHz, CD<sub>3</sub>CN)

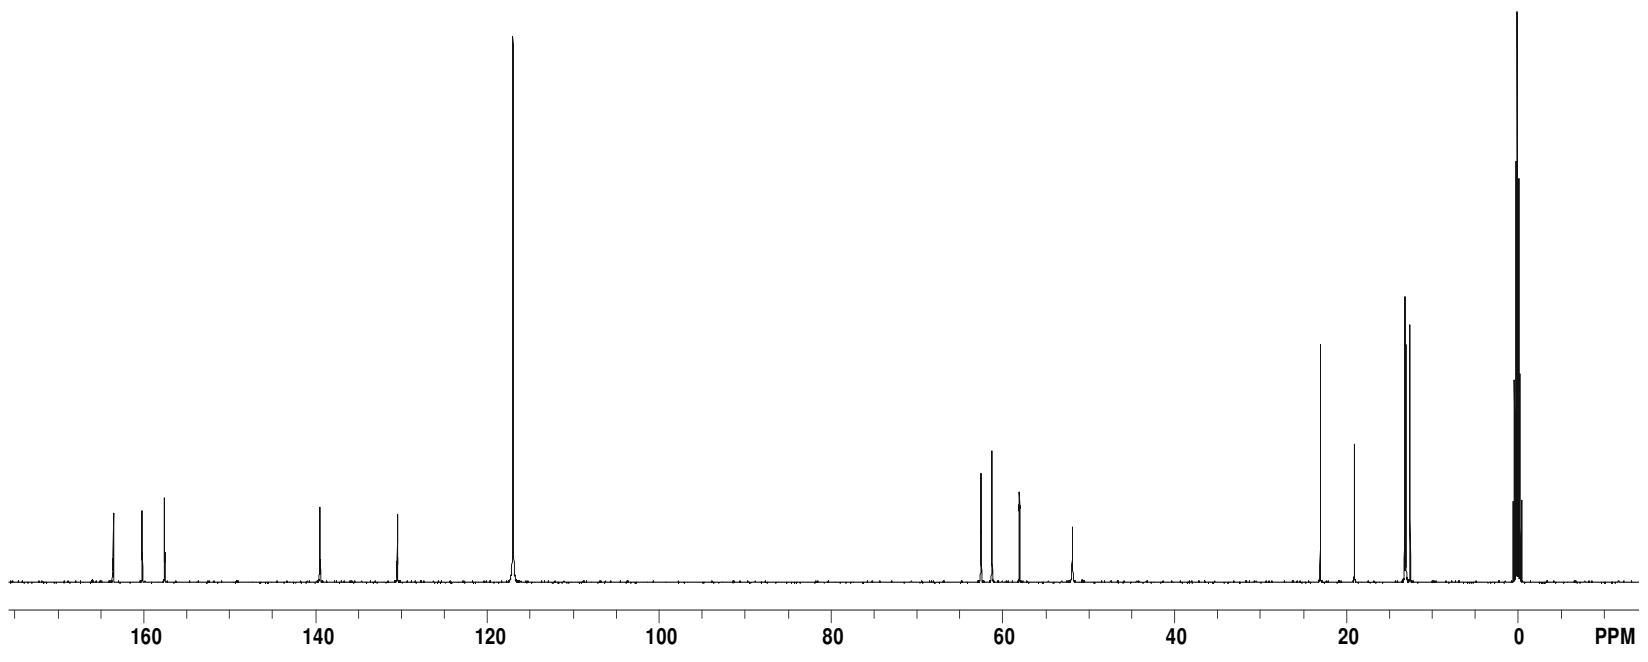

8/6/09 NEGATIVE MODE

LNG-436A-NEG 15 (0.274) Cm (1:16)

ES-37e5

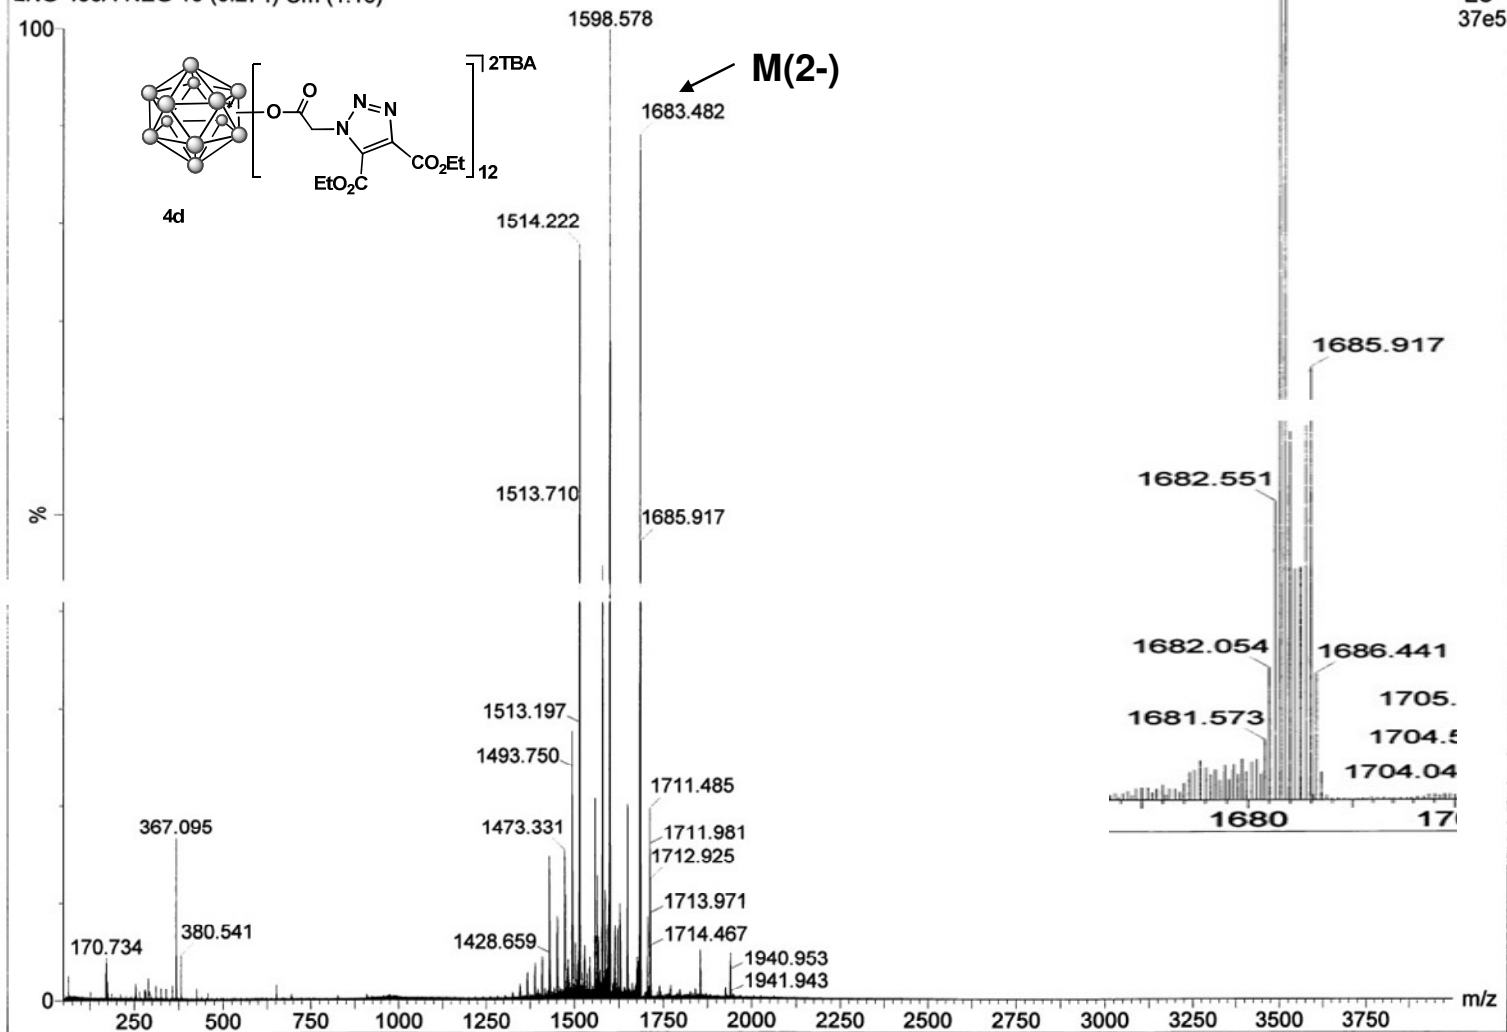

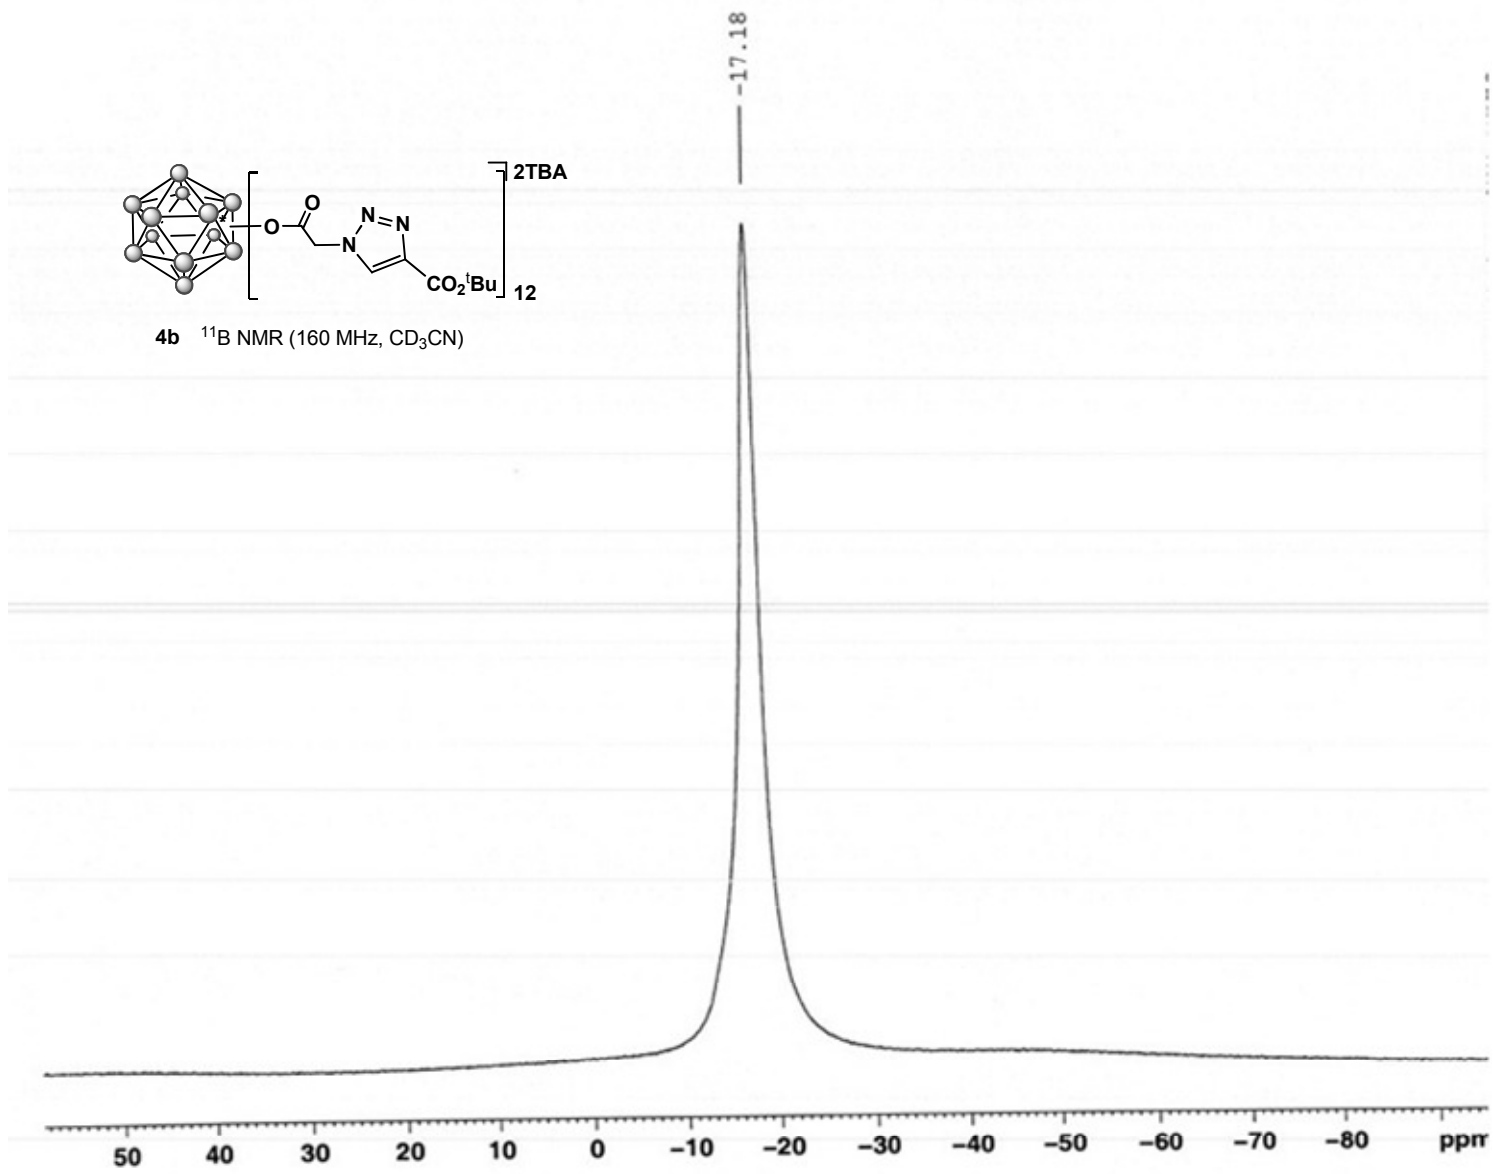

5.139  
5.025  
4.980  
4.931  
3.129  
3.119  
3.112  
3.107  
3.095  
2.238  
2.130  
2.123  
2.117  
2.110  
2.105  
2.100  
1.996  
1.989  
1.981  
1.976  
1.972  
1.966  
1.962  
1.660  
1.645  
1.635  
1.628  
1.619  
1.612  
1.596  
1.547  
1.524  
1.513  
1.462  
1.426  
1.413  
1.398  
1.383  
1.368  
1.353  
1.346  
1.339  
1.301  
1.270  
1.259  
1.224  
1.004  
0.998  
0.989  
0.975  
0.945  
0.922  
0.912

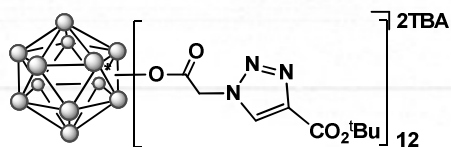

4b  $^1\text{H}$  NMR (500 MHz,  $\text{CD}_3\text{CN}$ )

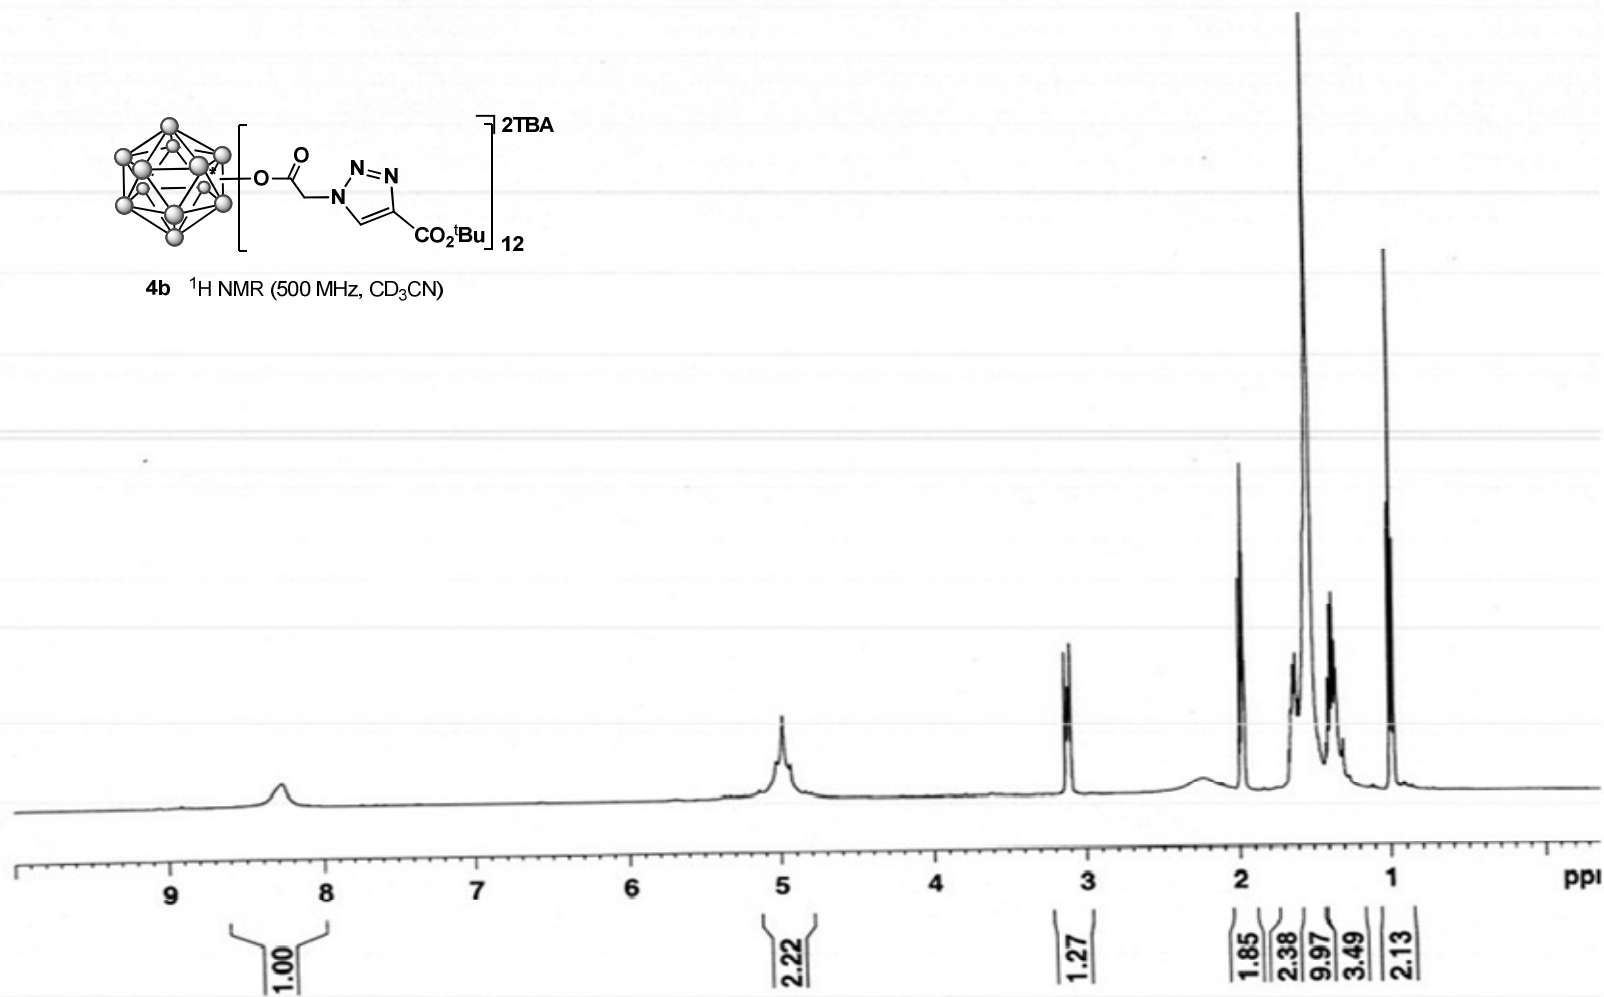

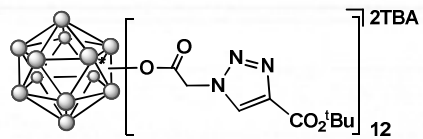

4b  $^{13}\text{C}$  NMR (125 MHz,  $\text{CD}_3\text{CN}$ )

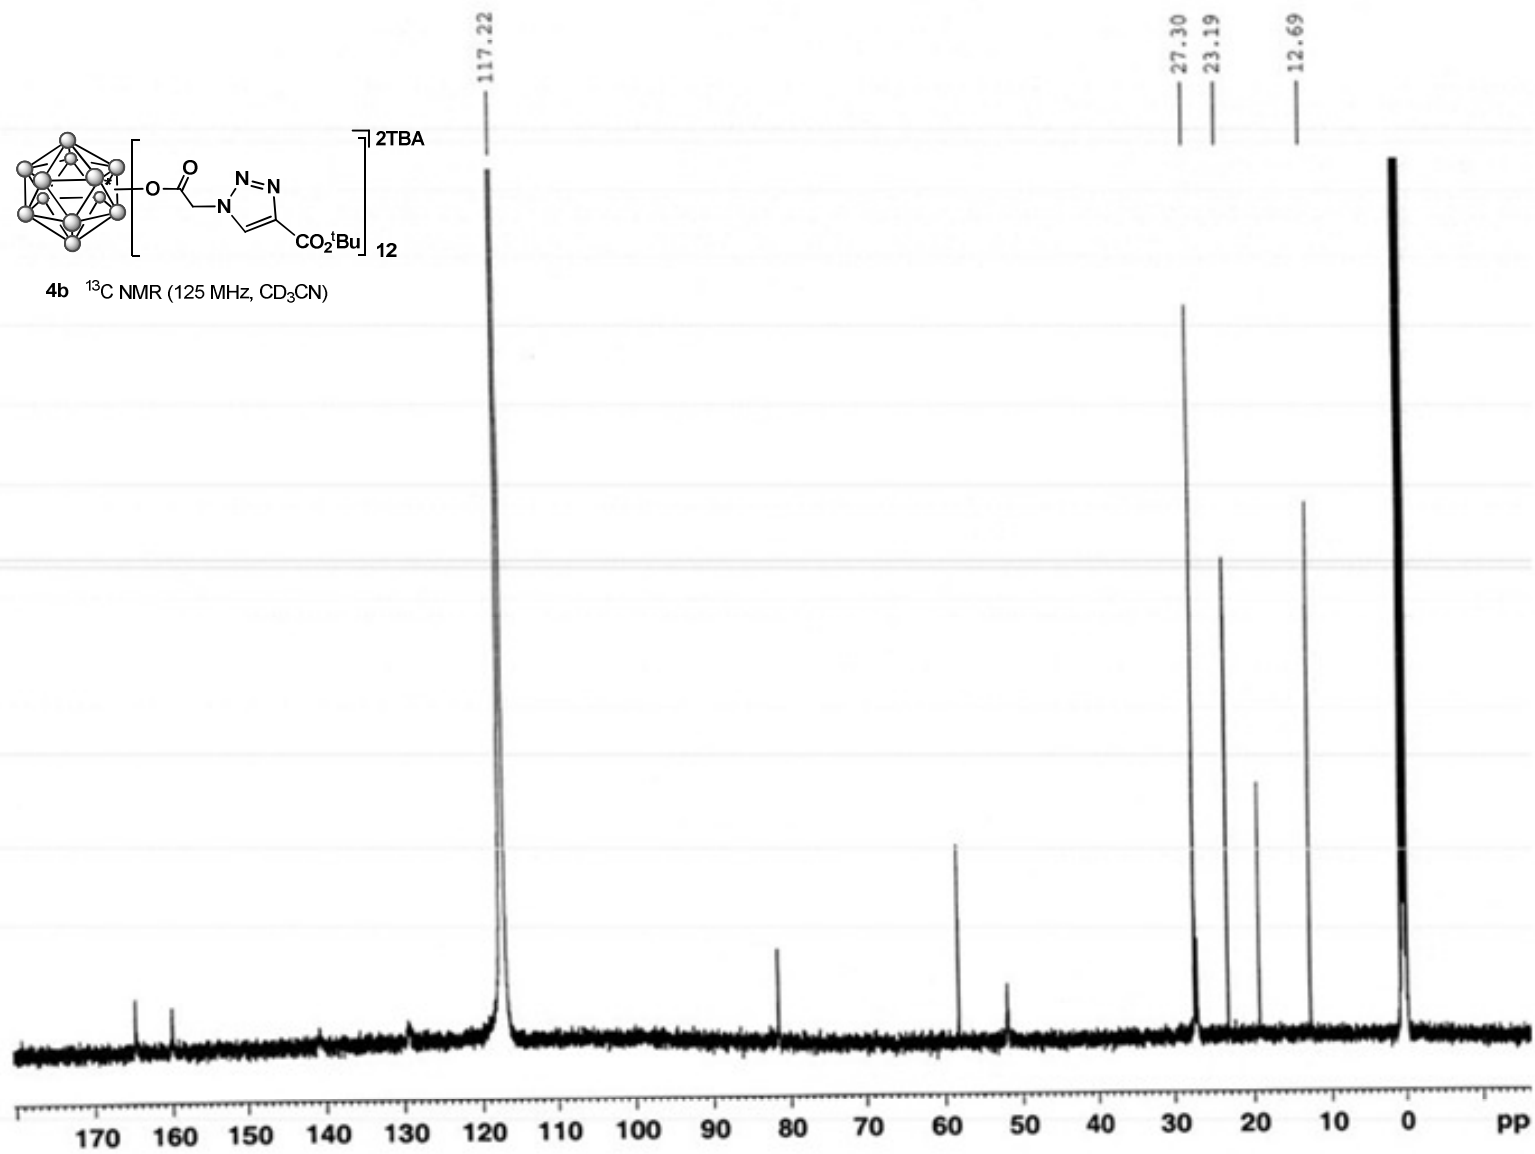

Mariner Spec #1 ASC[BP = 1421.5, 1018]

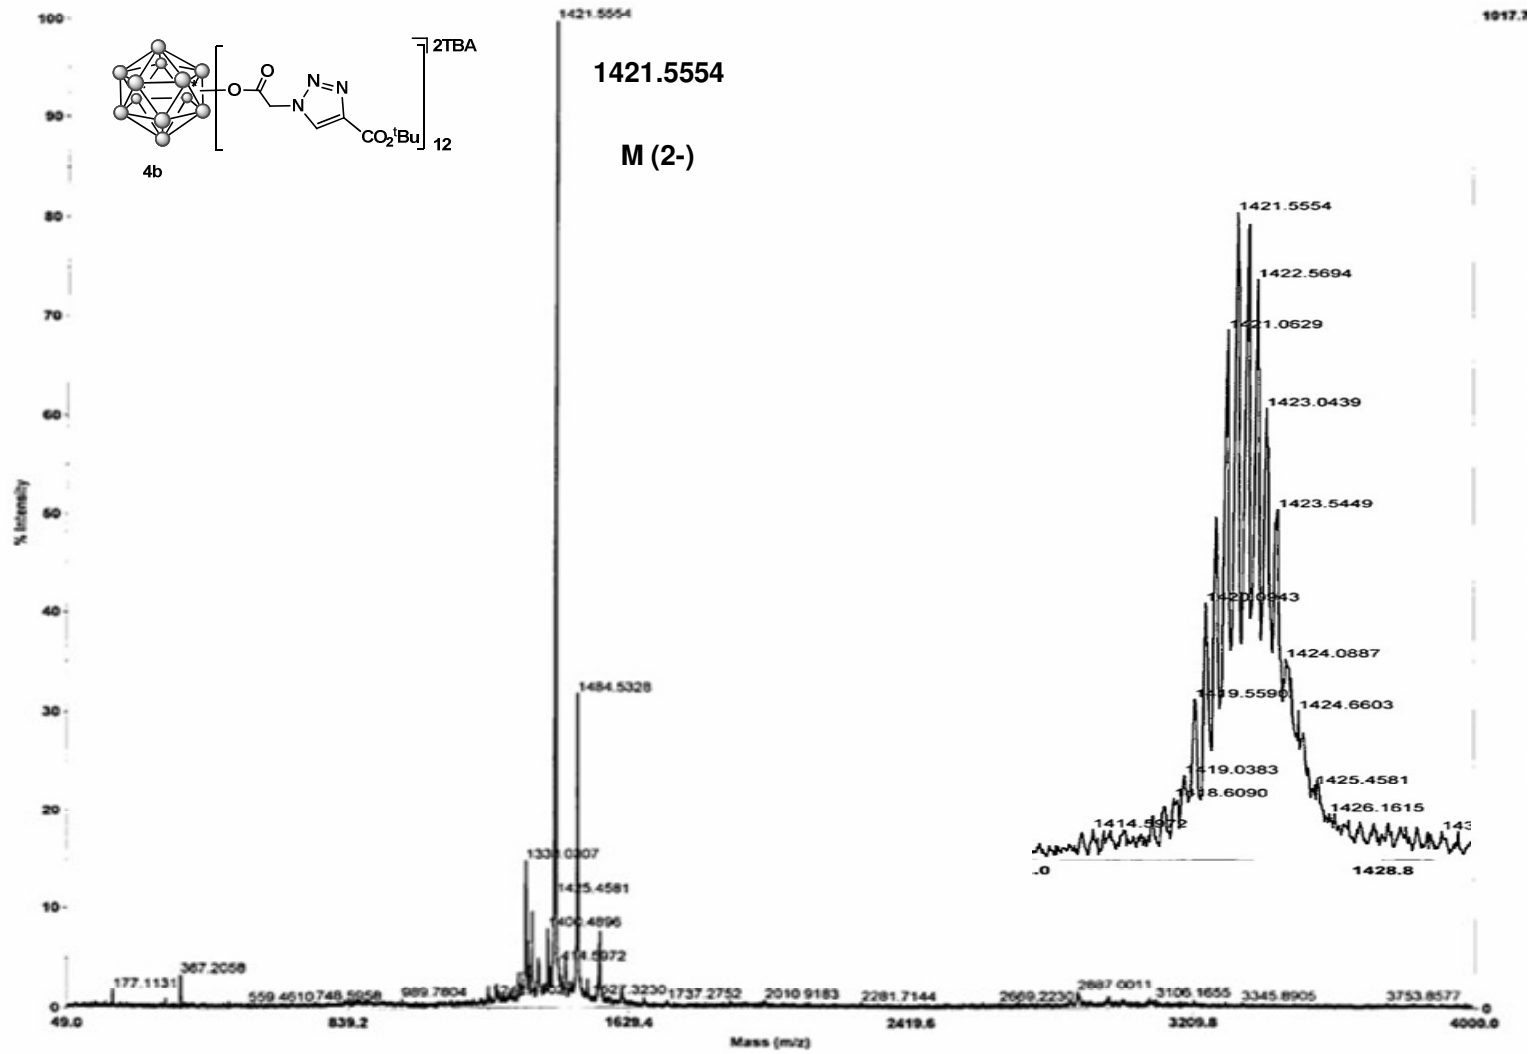



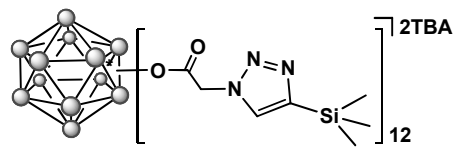

4c  $^{11}\text{B}$  NMR (96 MHz,  $\text{CD}_3\text{CN}$ )

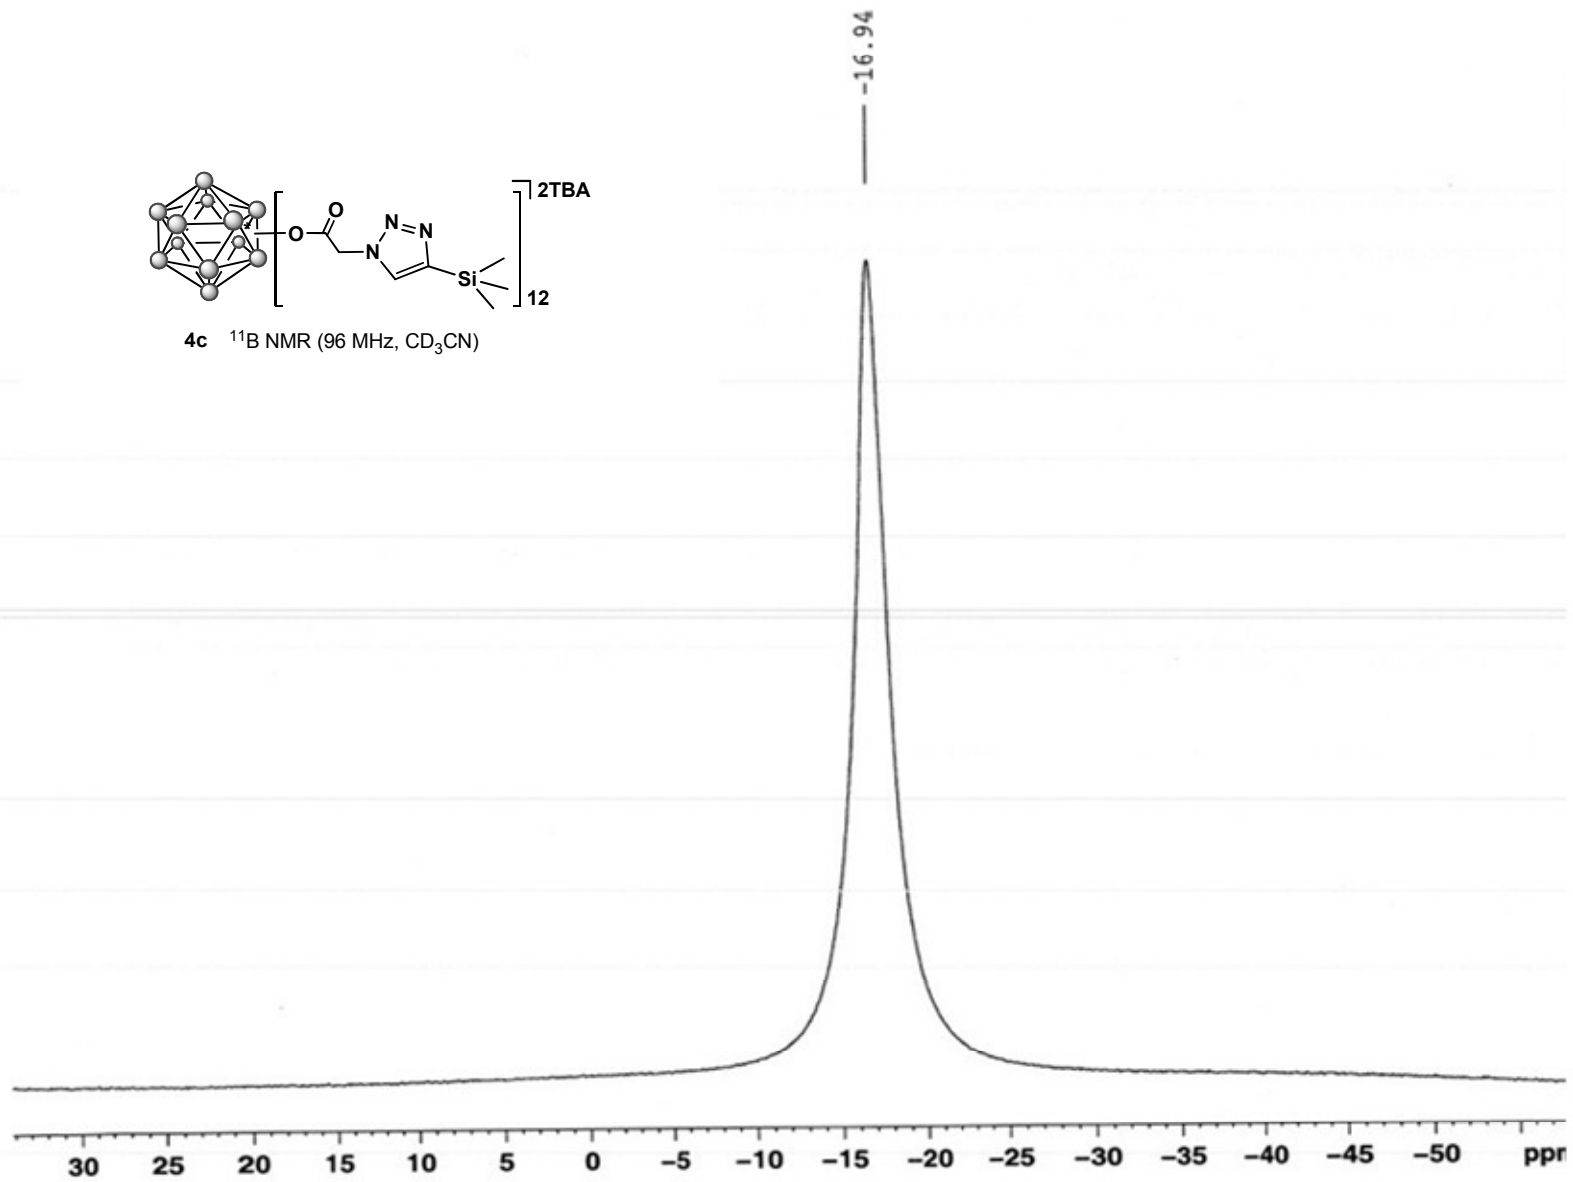

LG-263A\_silyl-PROTON 1 1 C:\Bruker\TOPSPIN\data\Topspin2\nmr goswami\_400

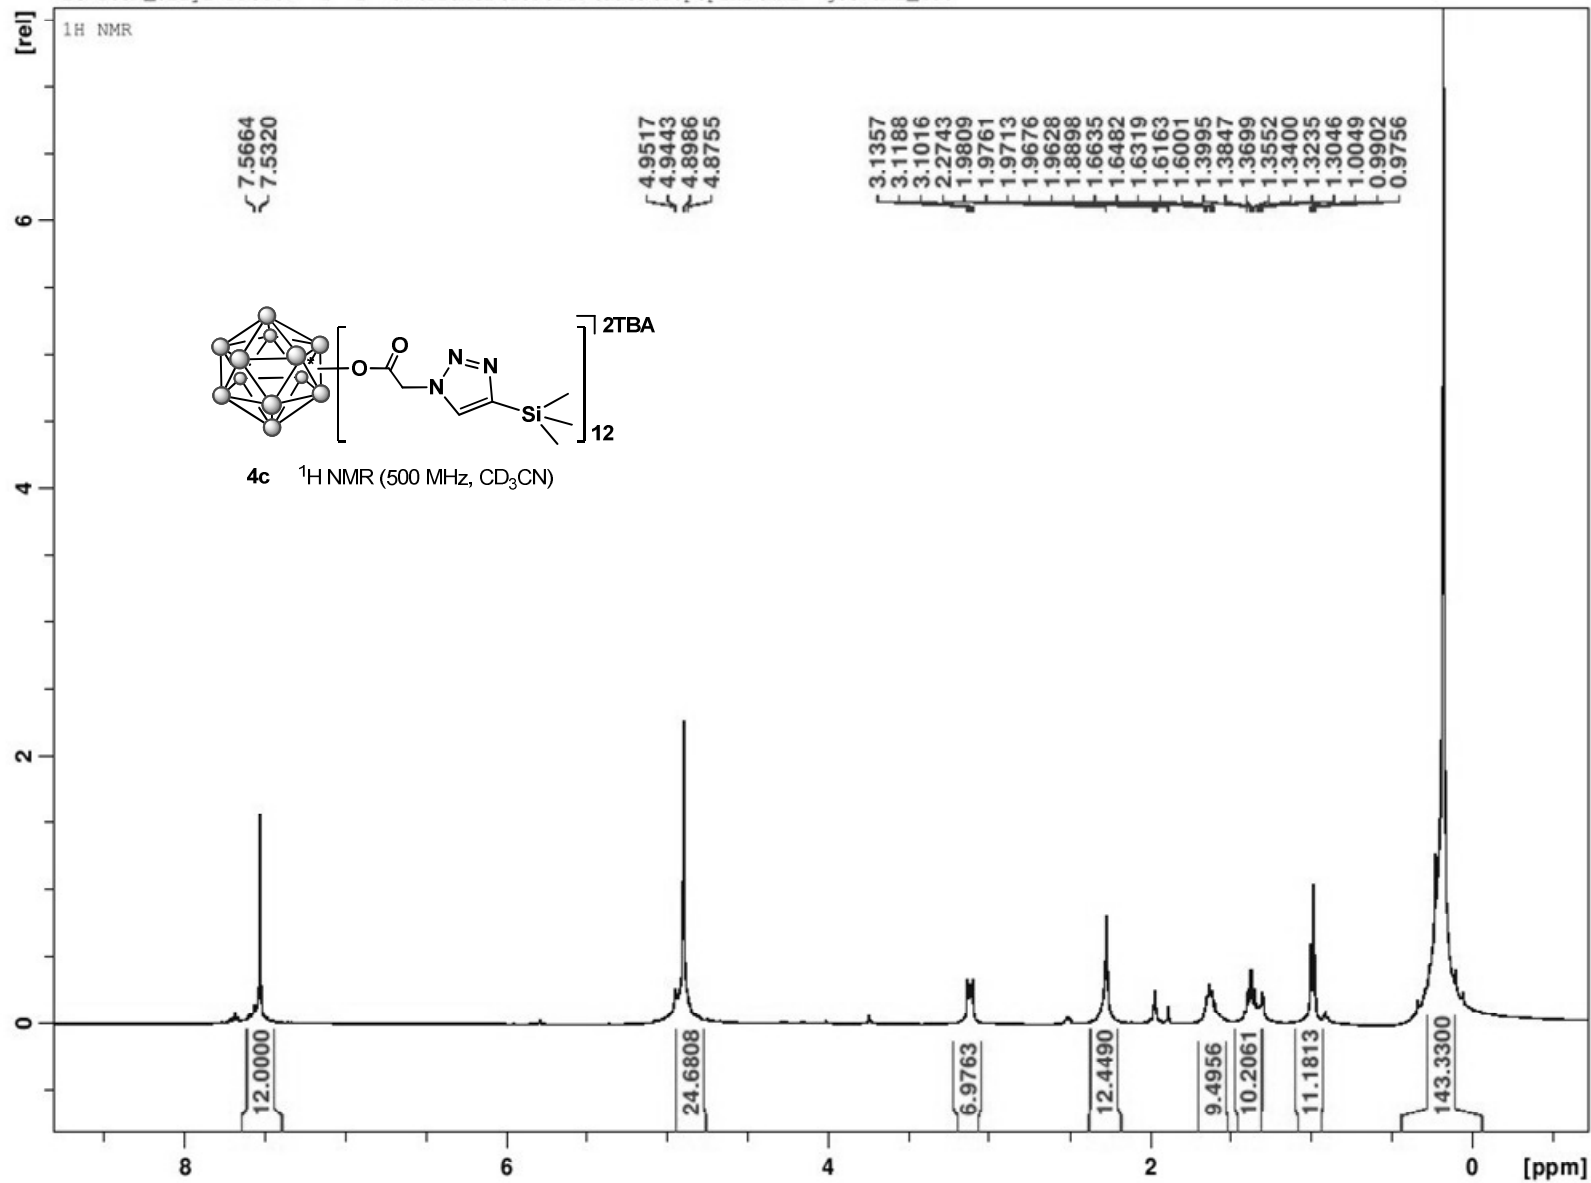

Mariner Spec #1 ASC[BP = 1254.7, 1413]

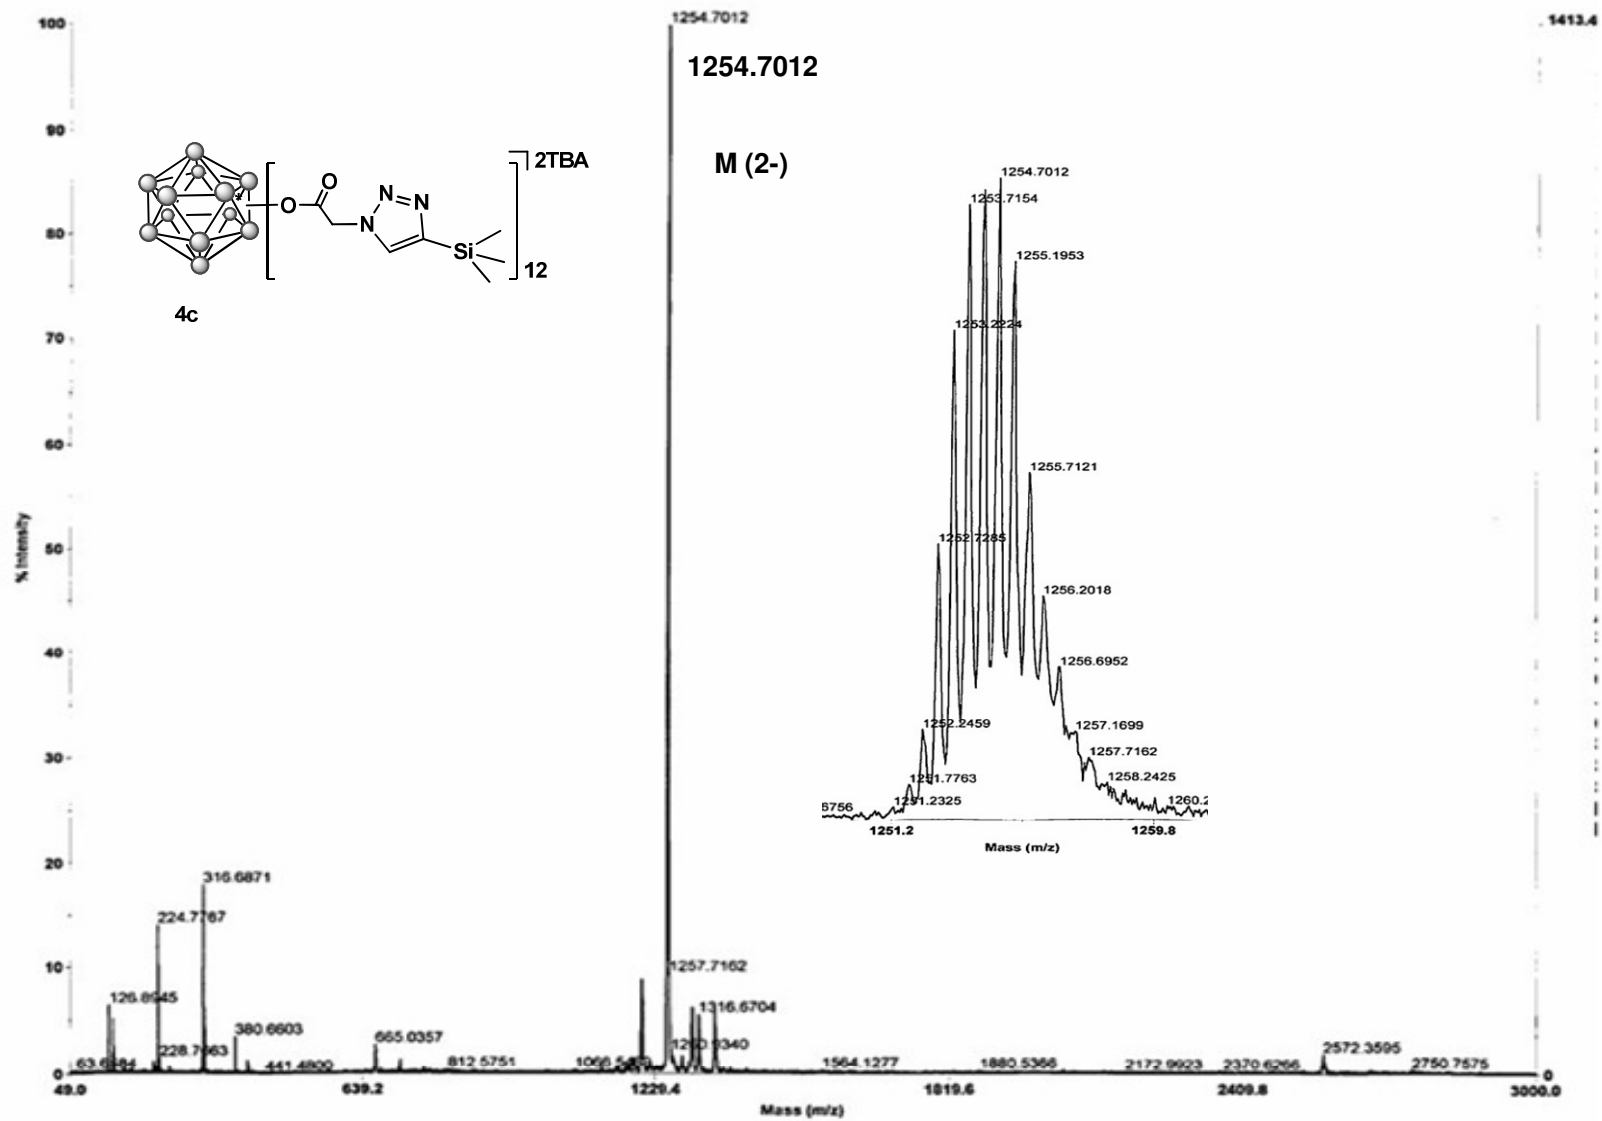

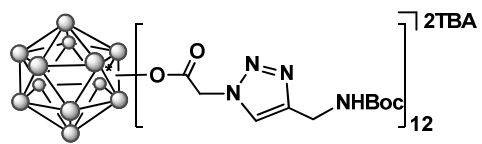

4f  $^{11}\text{B}$  NMR (96 MHz,  $\text{CD}_3\text{CN}$ )

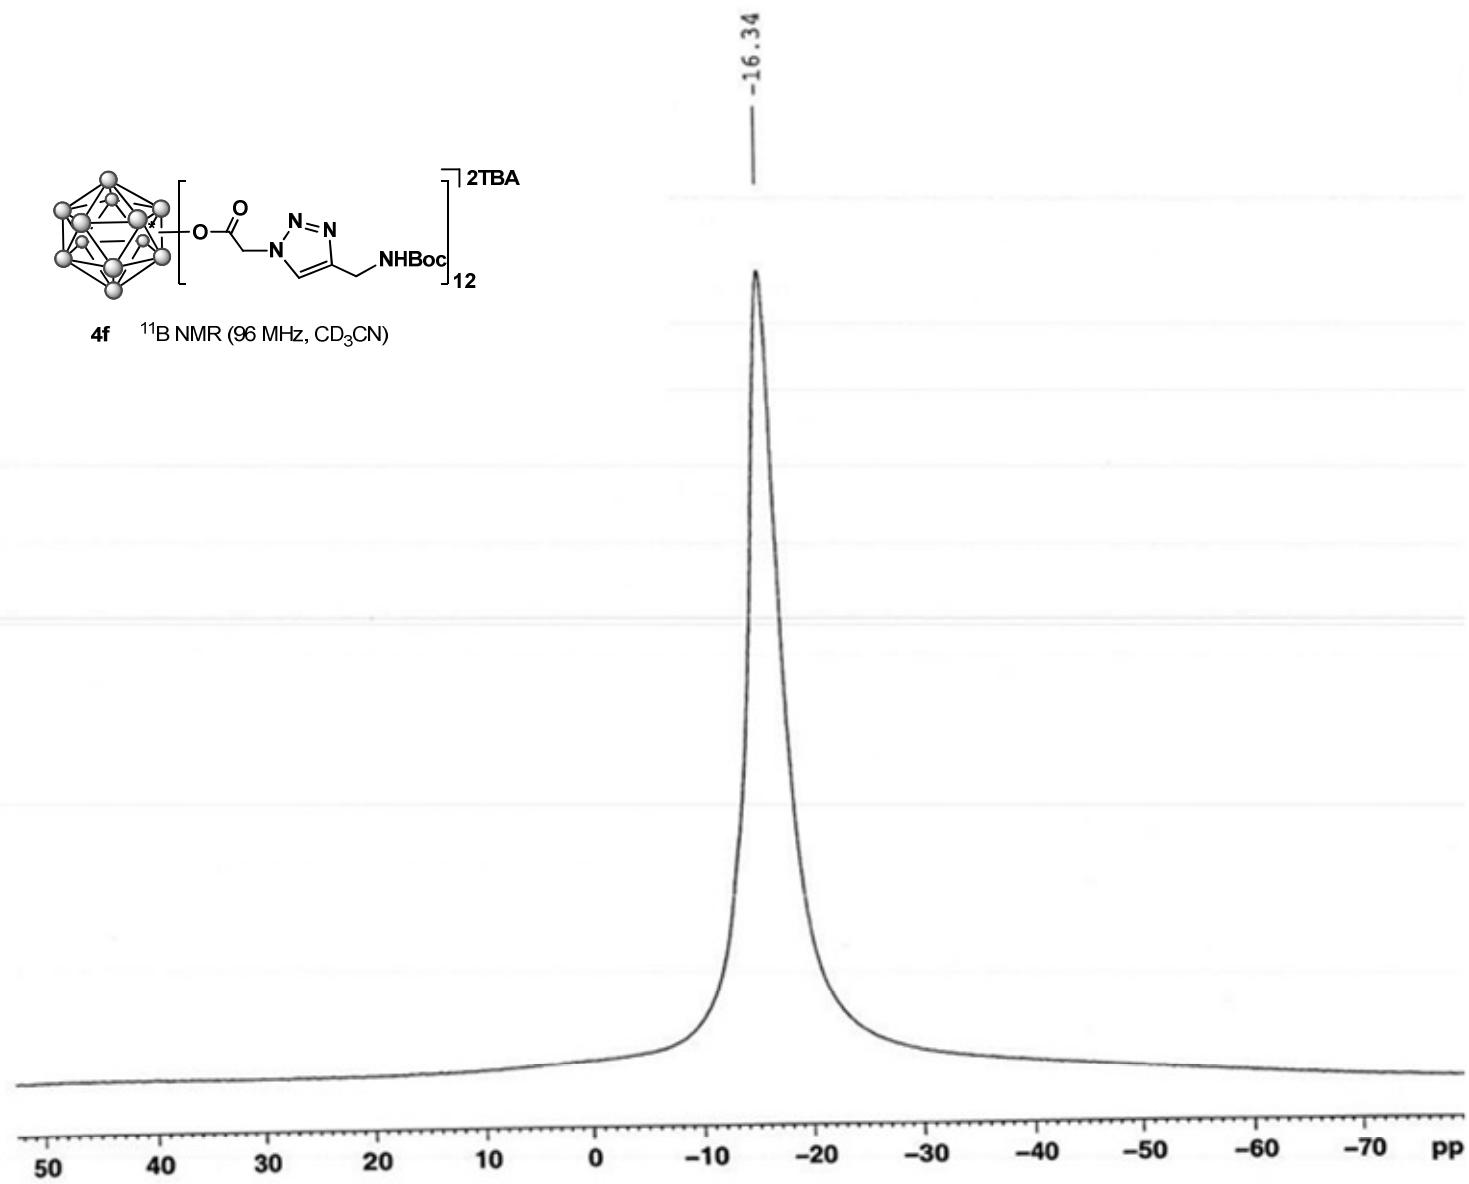

LG-270AA 1 1 C:\Bruker\TOPSPIN\data\Topspin2\nmr goswami\_400

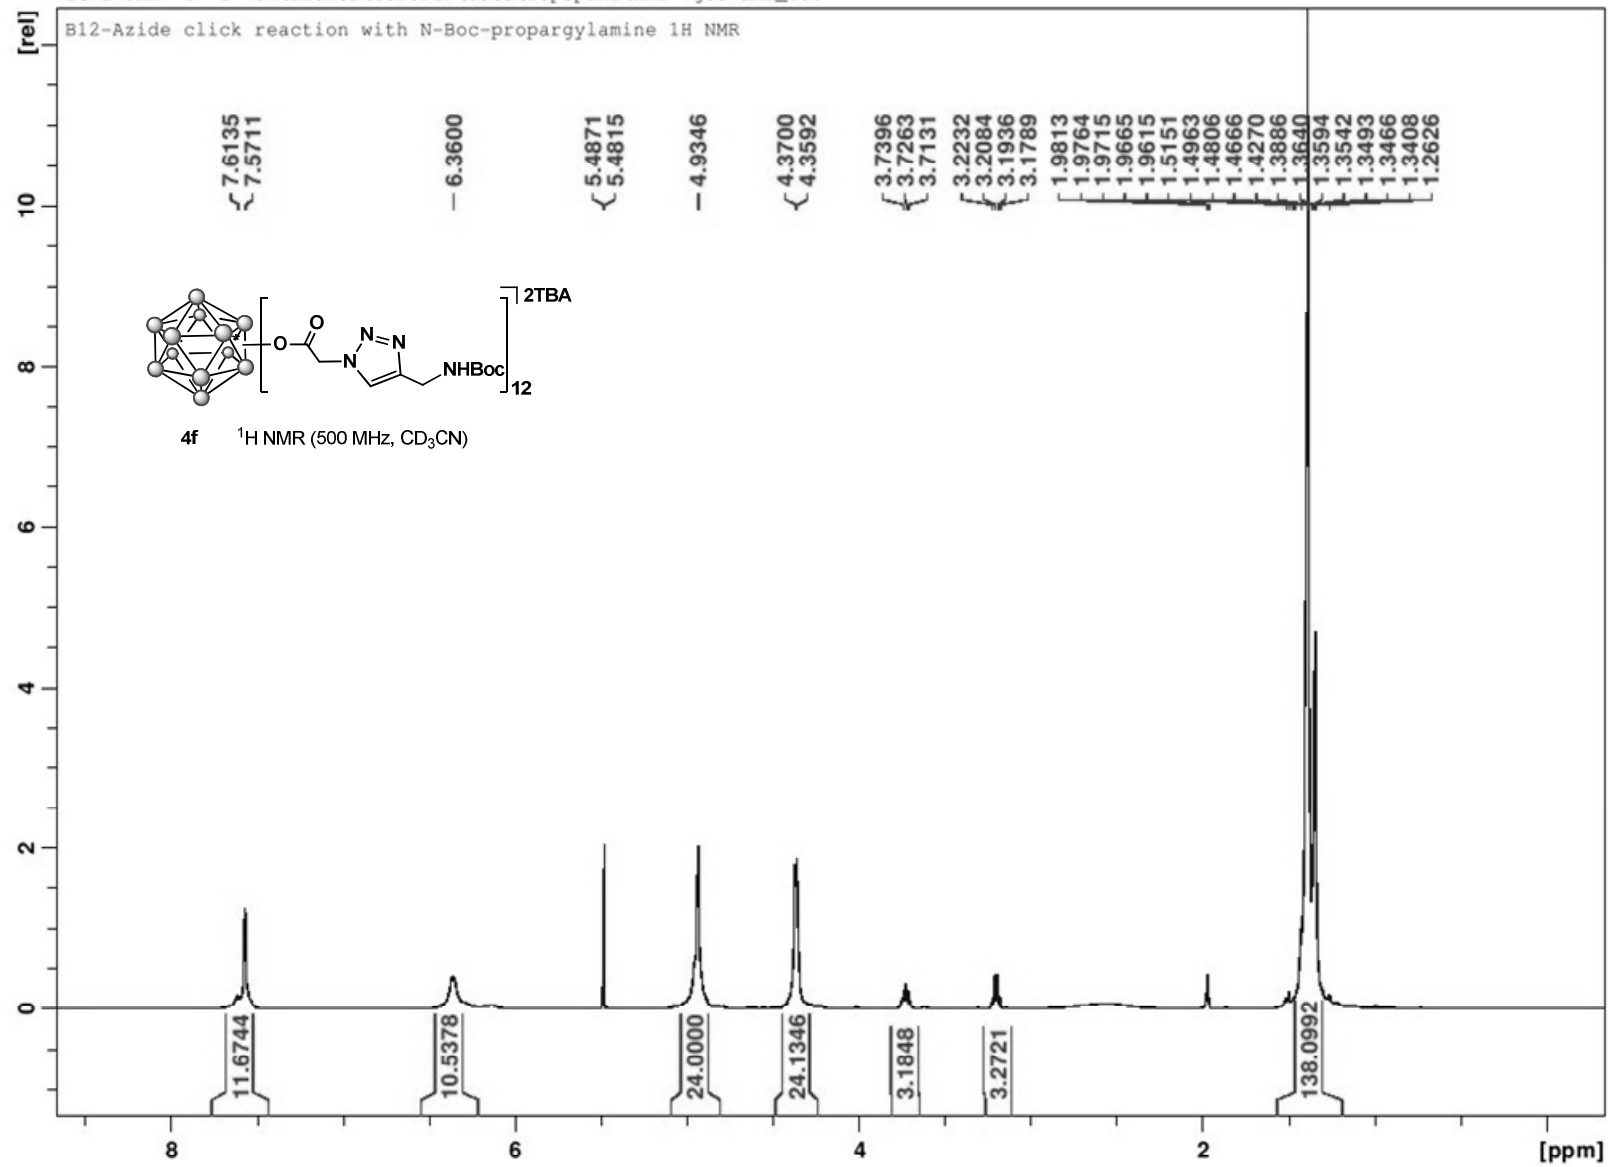

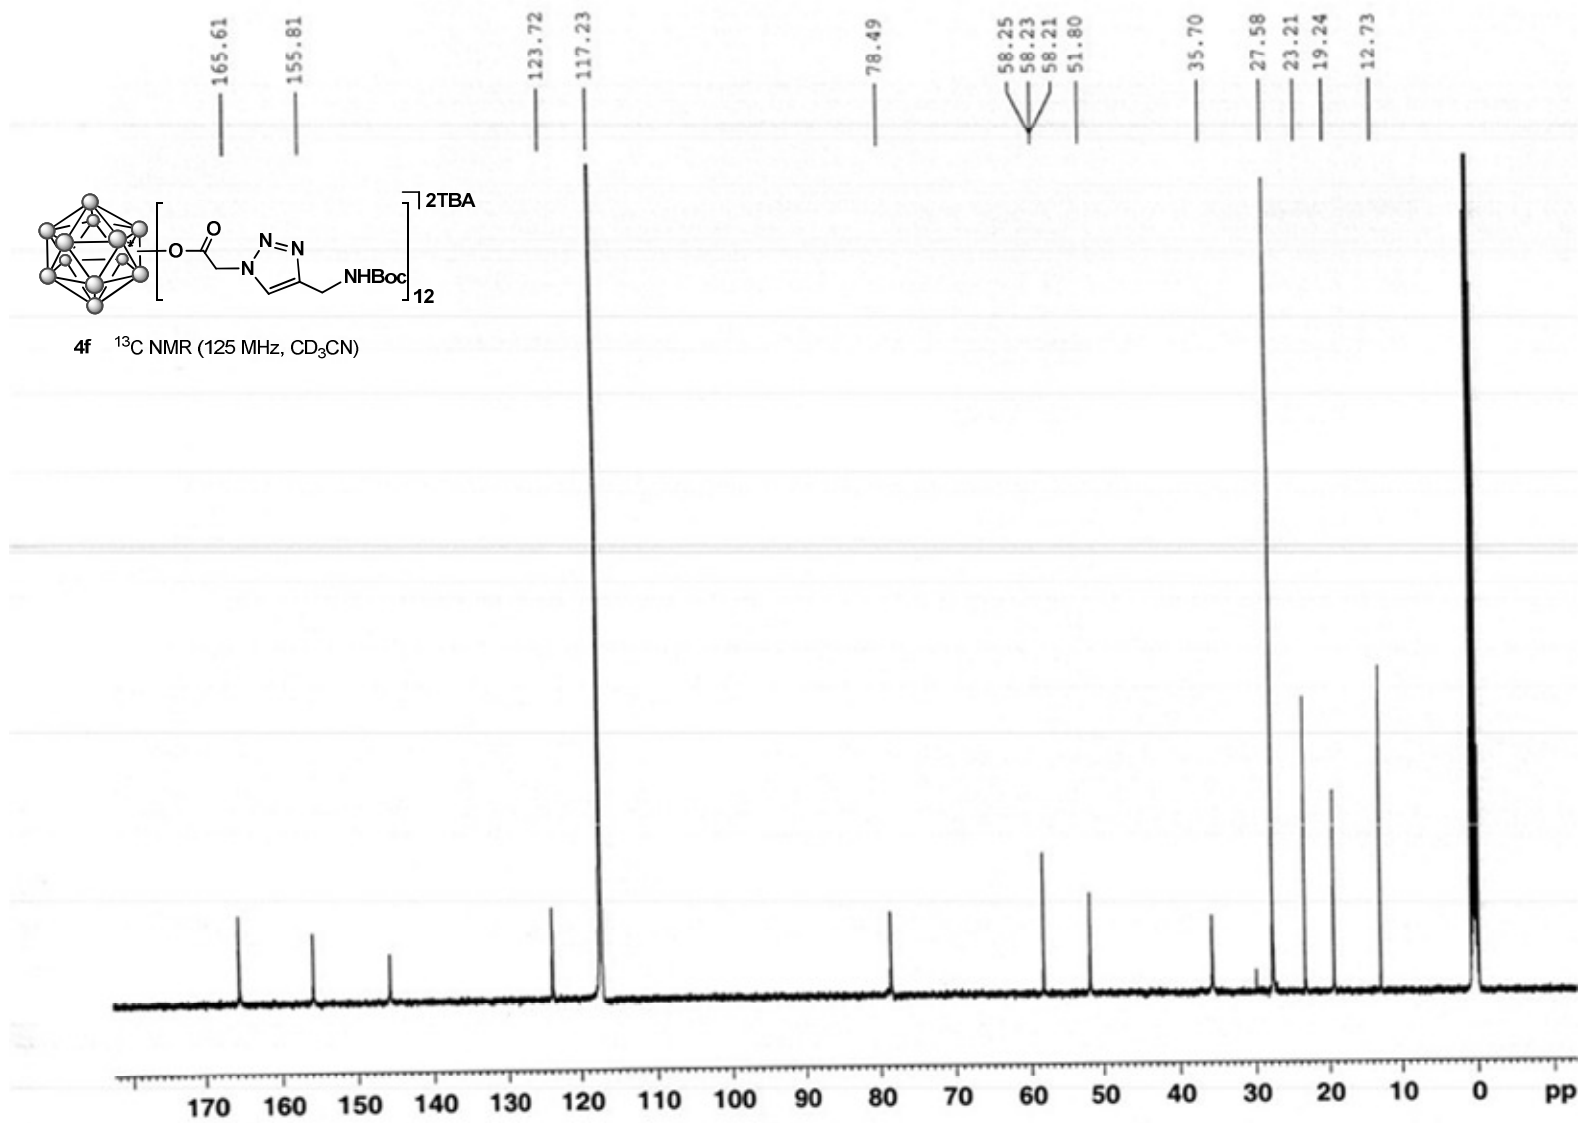

Mariner Spec #1 ASC[BP = 1595.7, 1204]

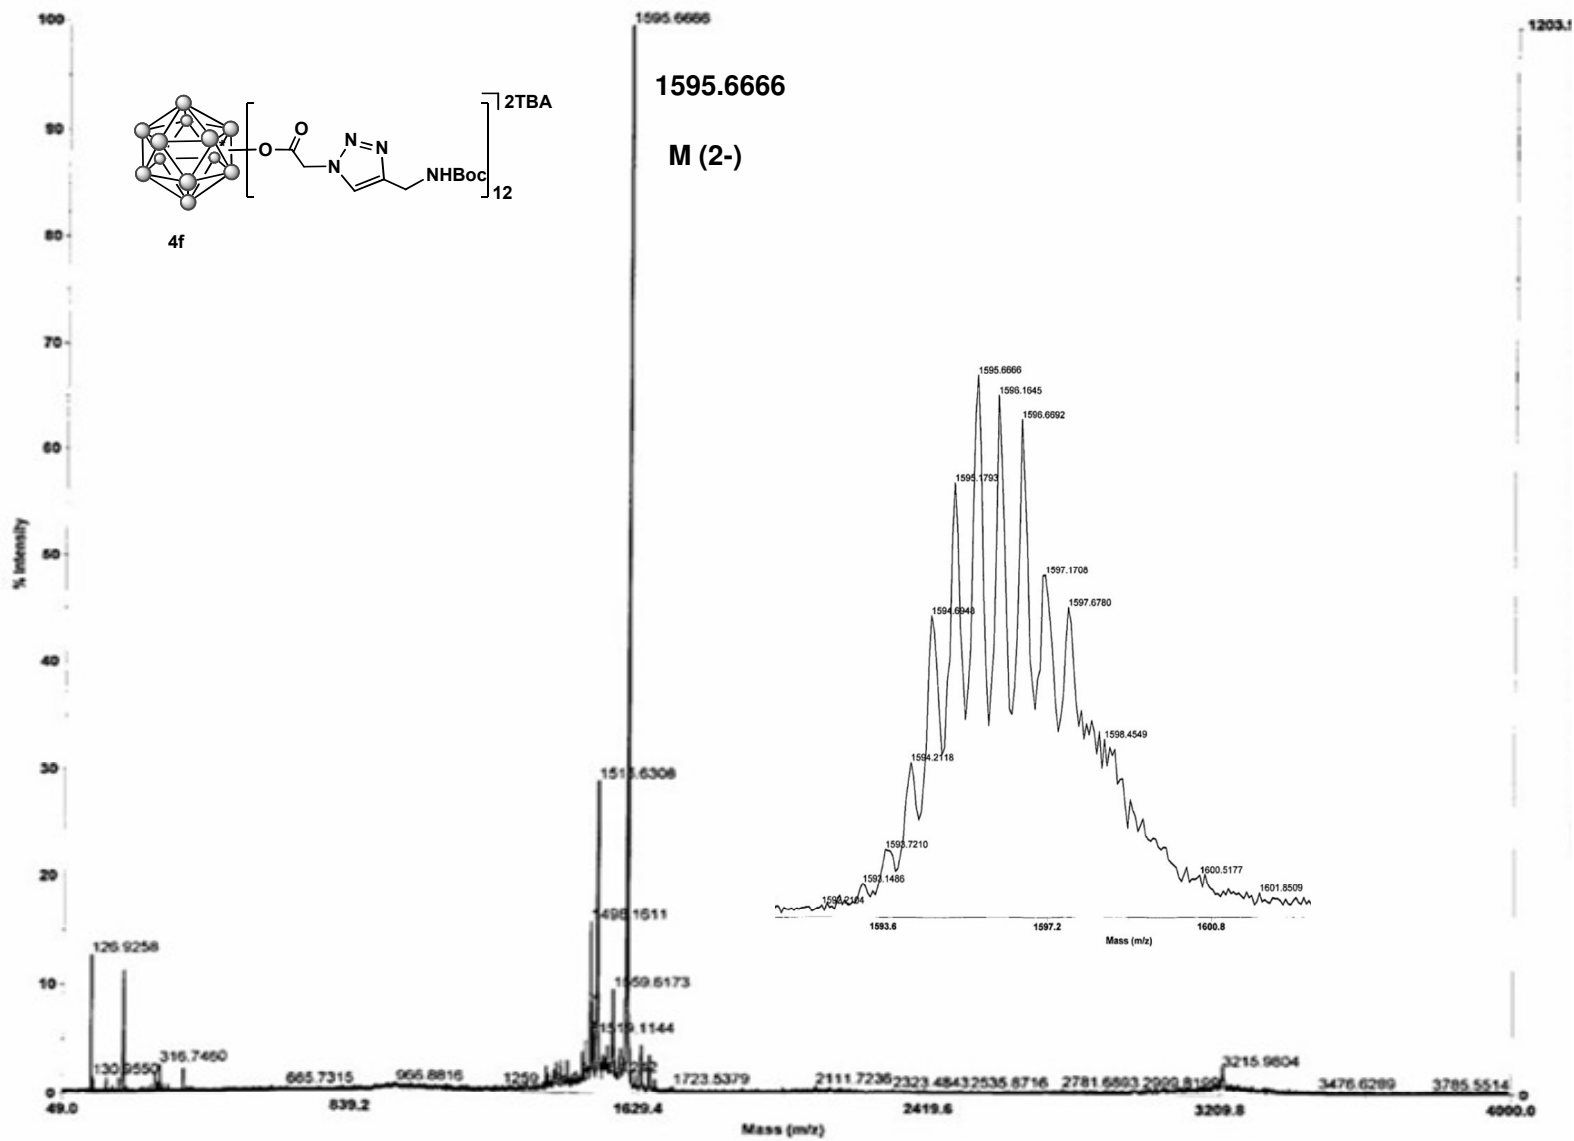

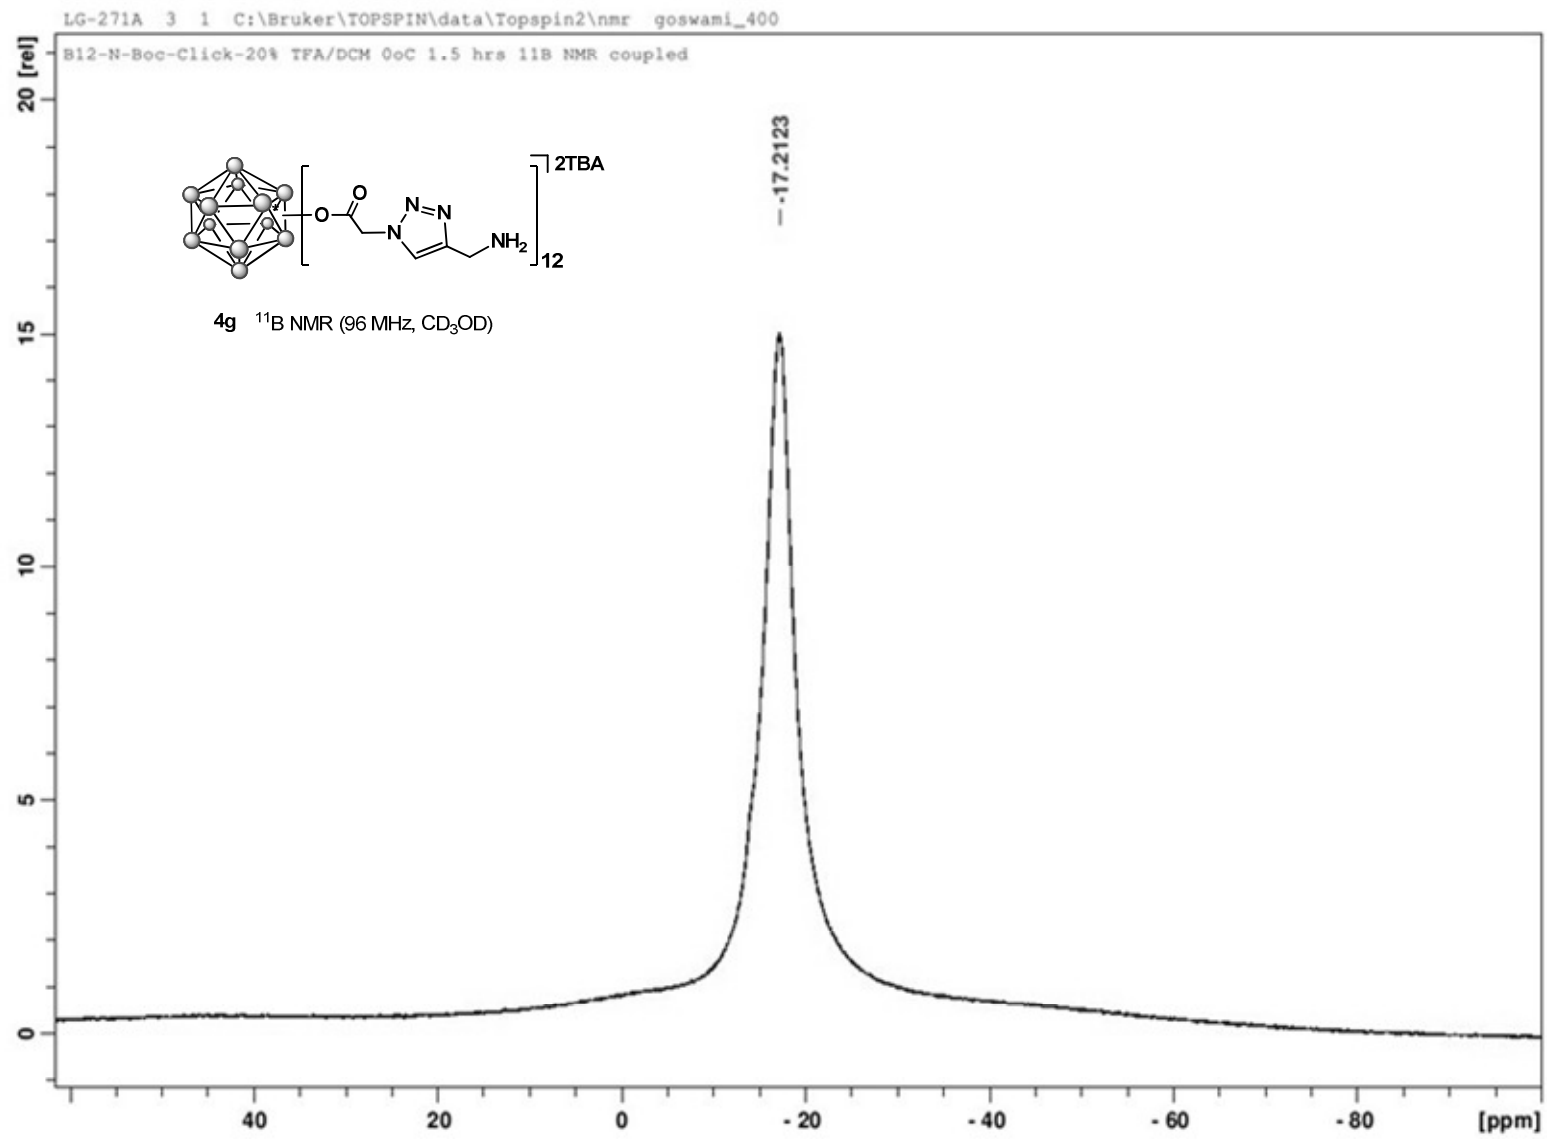



B12-CLICK-boc-propargylamine 20% TFA/DCM nmr in methanol 1H NMR

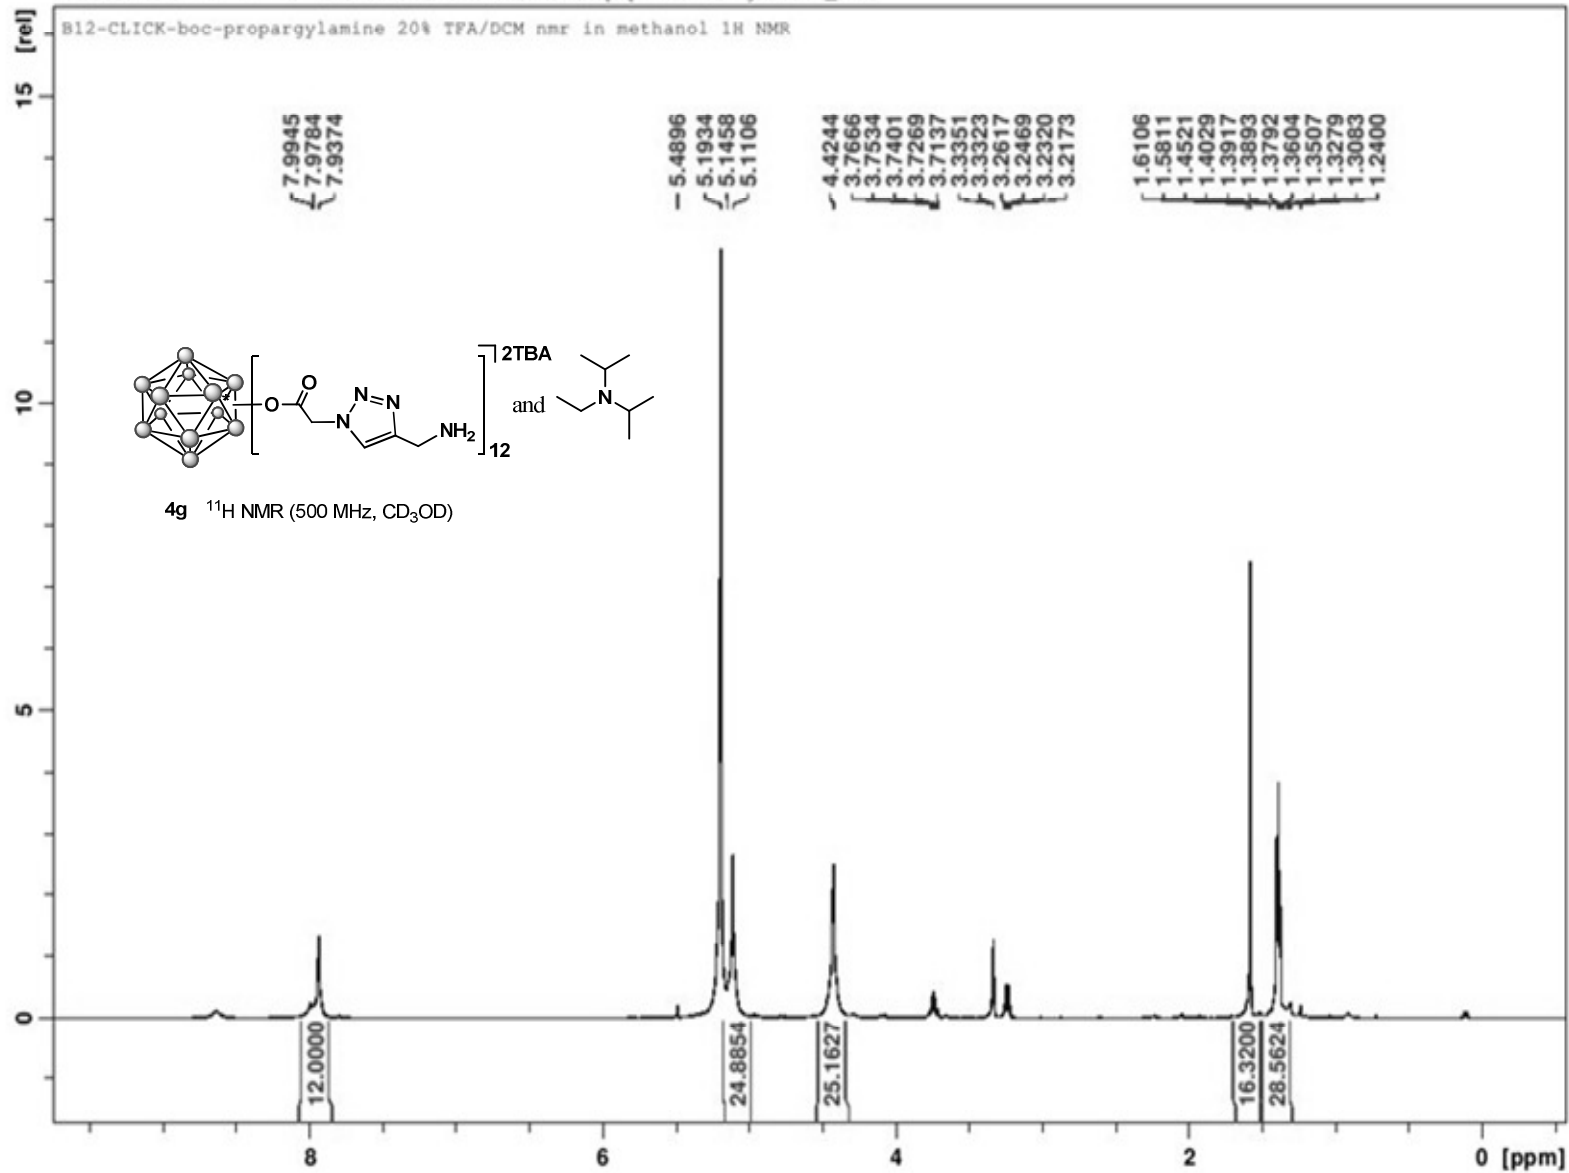

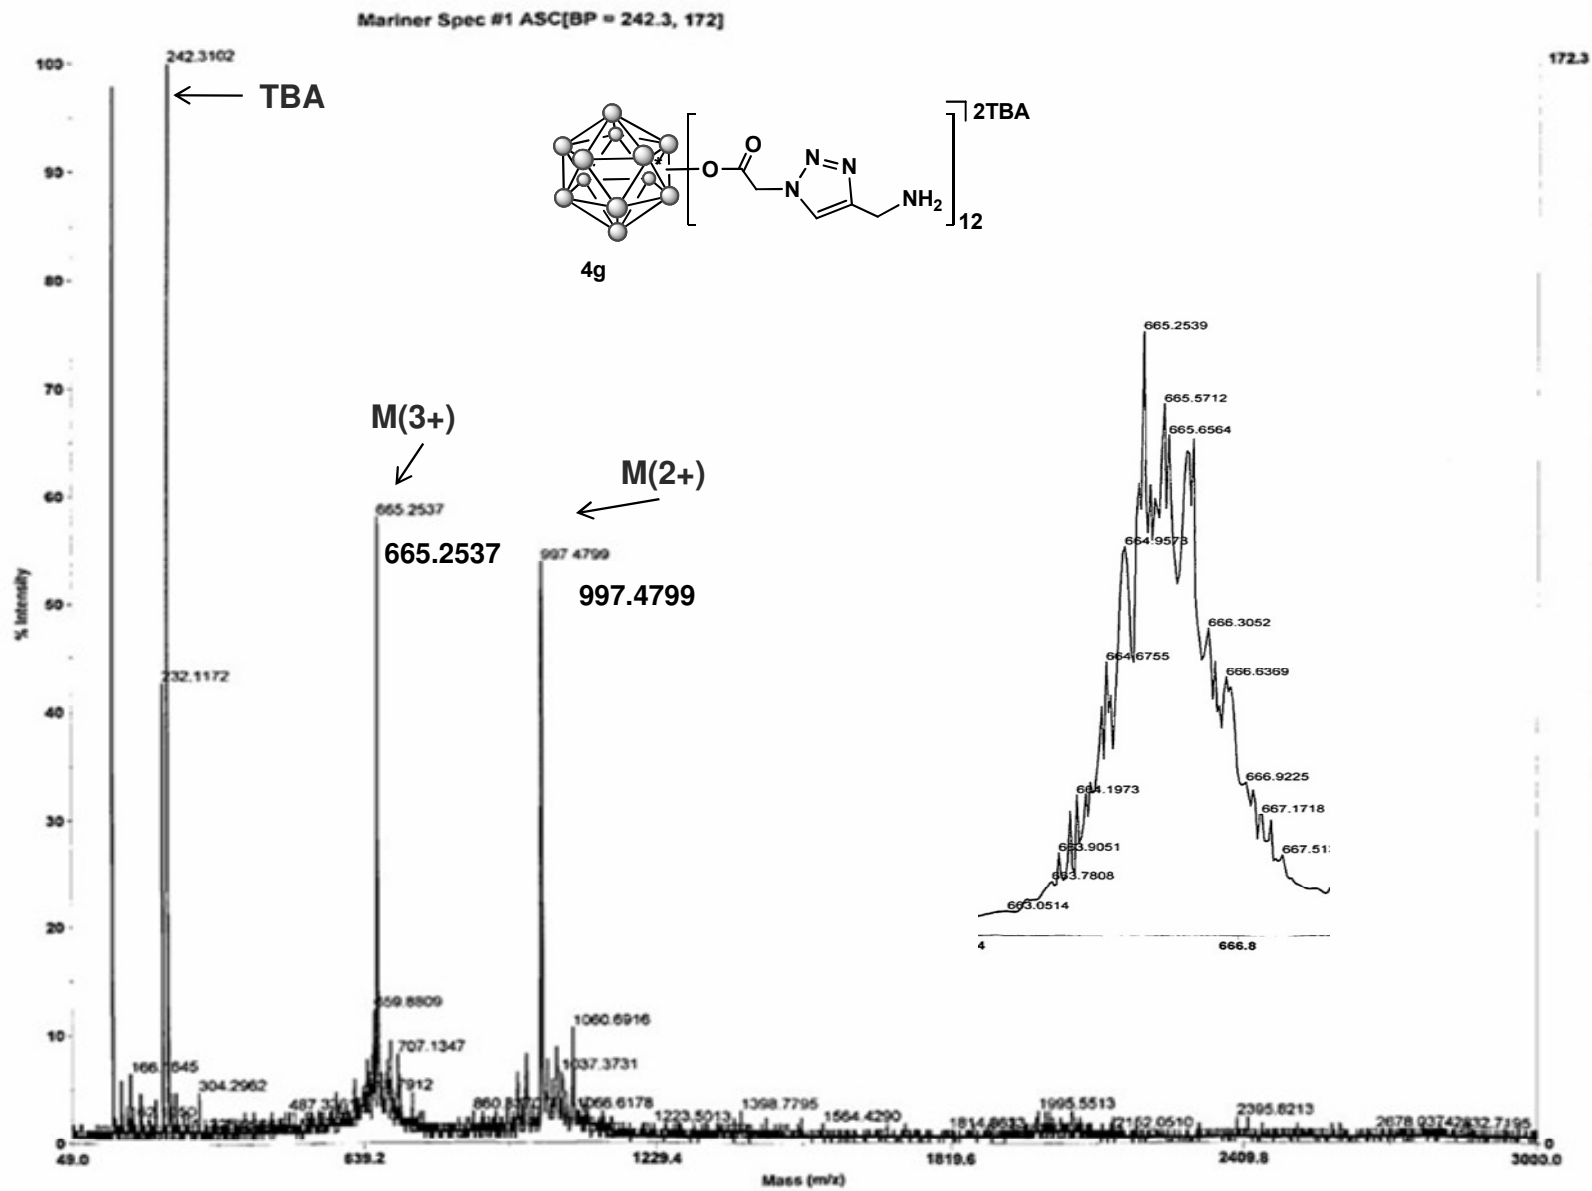

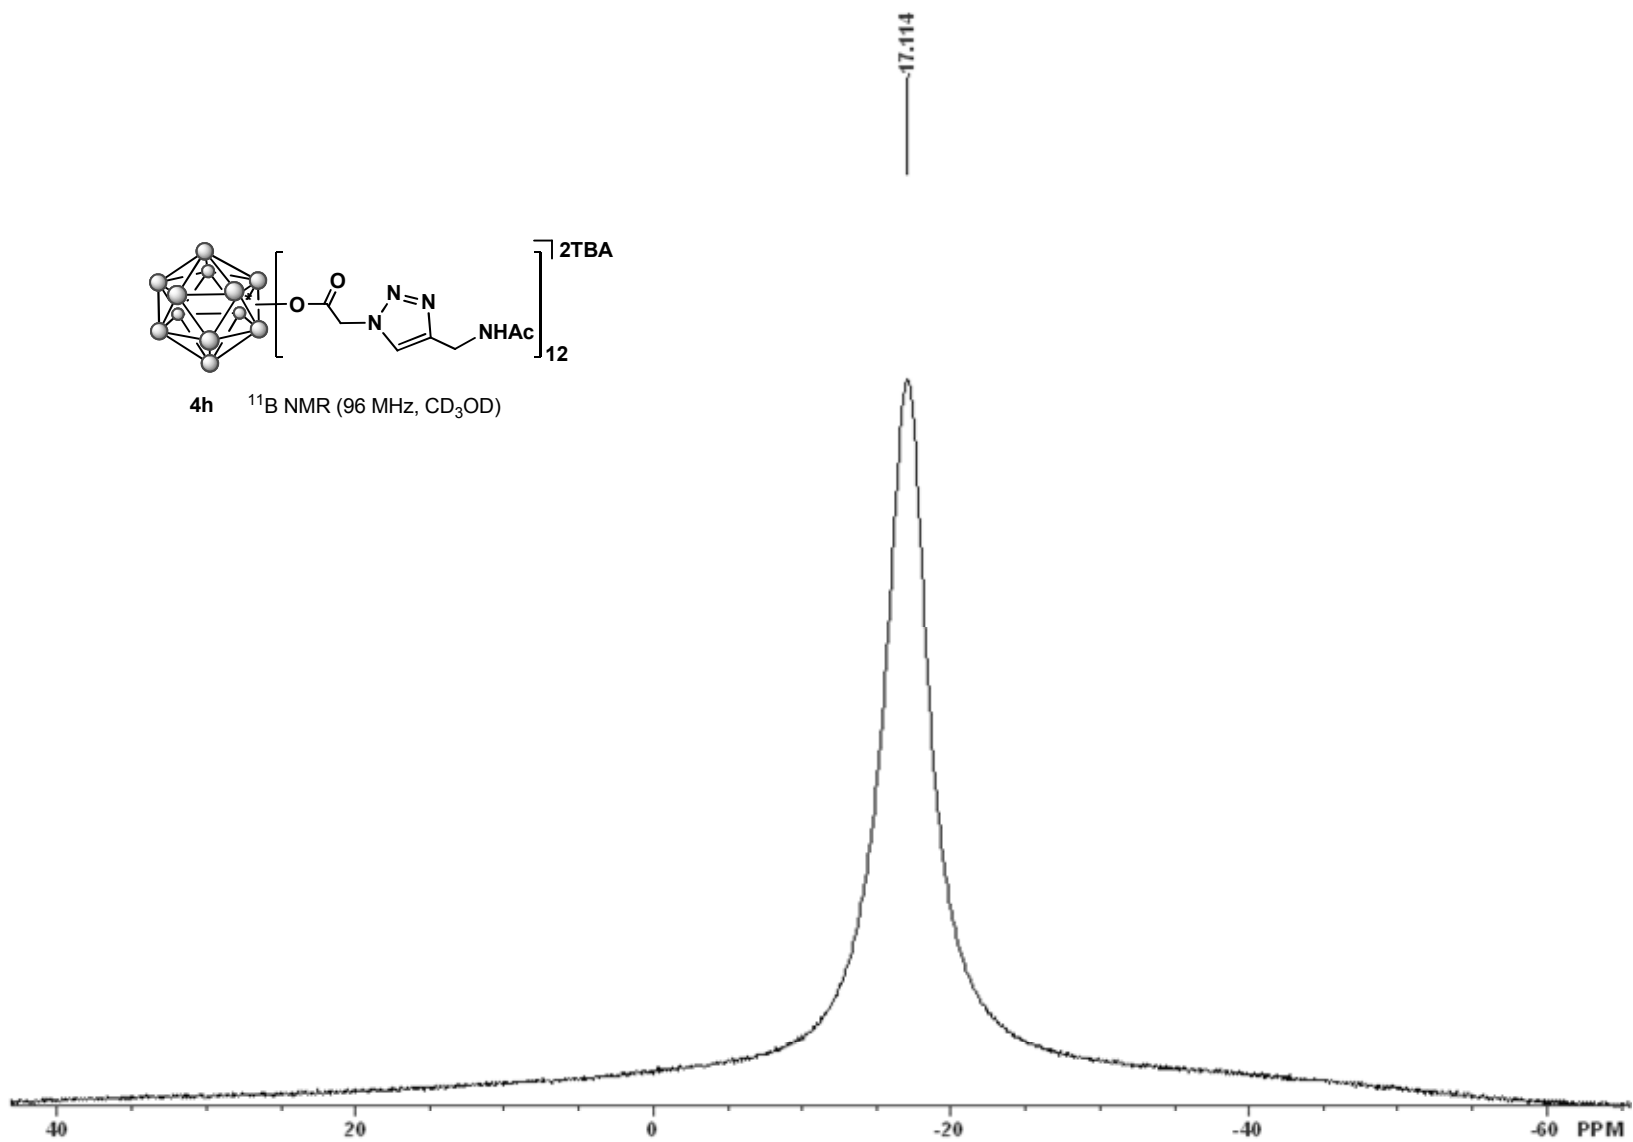

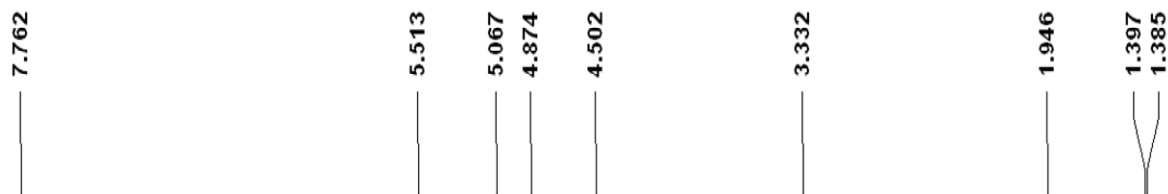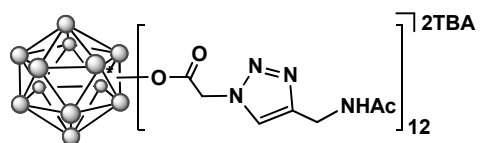

**4h**  $^1\text{H}$  NMR (500 MHz,  $\text{CD}_3\text{OD}$ )

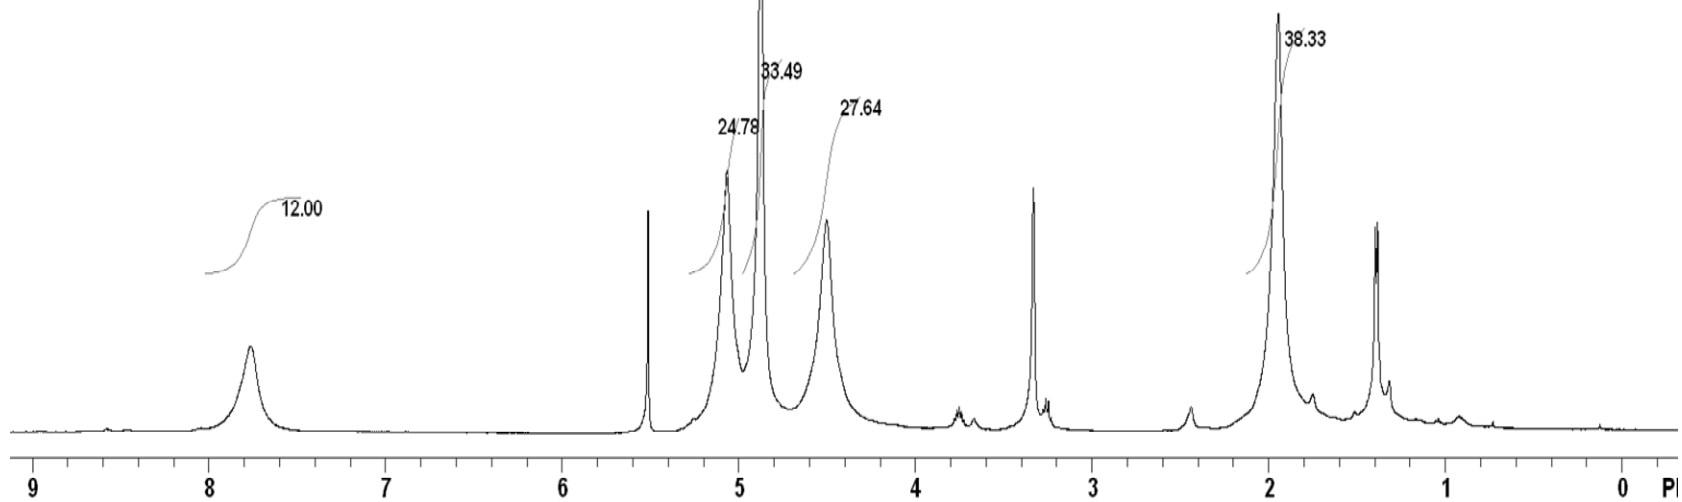

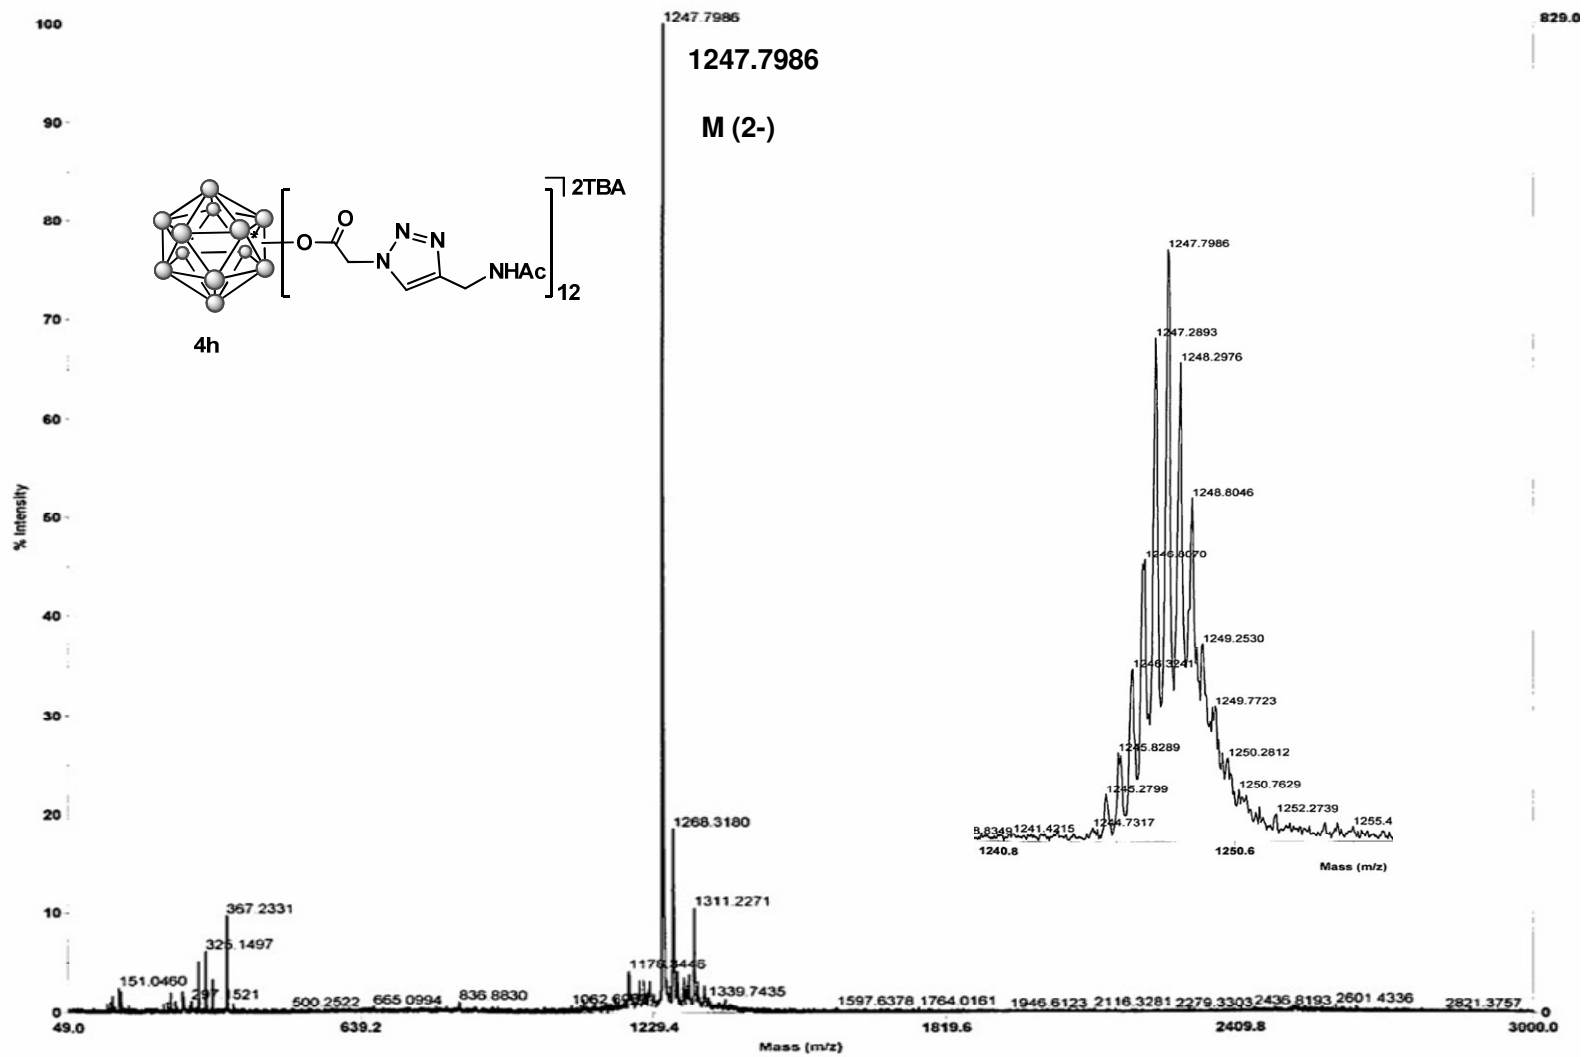

Acquired: Oct 14 16:16:00 2008  
 Mariner Mass Spectrum  
 C:\MarinerData\2008\Oct\14Tues\LNG-275001.dat
